# Supplementary material for: Bacterial small RNAs may mediate immune response differences seen in respiratory syncytial virus versus rhinovirus bronchiolitis
Source: Front Immunol. 2024 Feb 12;15:1330991. doi: 10.3389/fimmu.2024.1330991 (PMC10895043; doi:10.3389/fimmu.2024.1330991)
Supplement: Supplementary file 1 [file DataSheet_1.xlsx]

## Sheet: SupplementaryData1
Number	sRNA	Gene Sequence	RITT?	# RITTS	Rfam annotation?	Rfam description	Blast annotation?	Blast description	#A	#T/U	#C	#G	Length	C+G%	Detected in M35?
1	HiA_sRNA_00025	TTAACAGCAAGTGGCTTACTGCACGCATCCCTGCGGGATTTCTACCCAGTCCACCATAGA	n		n		n		15	14	19	12	60	51.6667	y
2	HiA_sRNA_00026	CCTTTAAAGCCACTATATCAGGAGACCAATCCTGTCTTCCTACAATATCCGTA	n		n		n		16	15	16	6	53	41.5094	y
3	HiA_sRNA_00032	TTAGCGCGACCTGACGAGGTAGCAAGCTAGGTTTAAC	n		n		n		10	8	8	11	37	51.3514	y
4	HiA_sRNA_00048	GGTTAAAGGTCAAGCGTAATTCACGCTGAATTTACTGTAAAATCTCACCGCACTTTGTATAAAAGTGCGGTGTTTTTATATC	y	1	n		y	eno	24	28	14	16	82	36.5854	y
5	HiA_sRNA_00051	GCACCCTAATCAGTTAAACCTTAGCCTAACTTTTGGGTGCAGATTCATTACTACTATTA	y	2	n		n		17	20	14	8	59	37.2881	y
6	HiA_sRNA_00072	GTGCTTCAATAATGTAAAAAGGGATGGTTGATTTTTCGTCAATCATCCCTTCTTTTATA	y	2	n		y	glyS	16	24	9	10	59	32.2034	y
7	HiA_sRNA_00076	ATTTCACGTACGTATAAAAAATGGTGCGTGAATTTTGAATTCA	y	1	n		n		15	15	5	8	43	30.2326	n
8	HiA_sRNA_00100	AATCGACCGTTTGGCACCCCGAT	n		n		n		5	5	8	5	23	56.5217	n
9	HiA_sRNA_00124	TAAAAAATAAGCGGCGATATTAATCGCCGCTAAACATATAATCAACGAAAGAAAATAA	y	1	n		n		30	11	9	8	58	29.3103	y
10	HiA_sRNA_00131	CATAAAAAAGCCCACATAAATGTGGGCAAAAATAAGGATAAAATTATGAAACTACAACTAAACTACT	y	1	n		y	-	35	13	11	8	67	28.3582	y
11	HiA_sRNA_00177	TAAACAAAAGGGGTGAGTATAAATTTACACTCAACCCTTTATCTTCATTA	n		n		n		19	16	9	6	50	30	y
12	HiA_sRNA_00190	AAAACAAAAGGCAGACTTCCGCCTGCCTTATTTAACGTATCTTATTCGCCGGAATAATCTTCACCGCCAGAGGCAGCTTCACTCACATCACTAGATAAGG	y	2	n		y	-	31	24	28	17	100	45	y
13	HiA_sRNA_00201	TCTTTAAAAAGGGGAAGATCCACTTCCCCTTAGACTACAACAAAAATTGA	y	1	n		n		20	12	11	7	50	36	y
14	HiA_sRNA_00208	TGTTTTTTGAATAATCTGAAATAACTTAAATTTTAACCGCACTTCTCAAATAGCGTCGTGAAGTGCGGTTTTATTTTGGGG	y	2	n		n		22	32	11	16	81	33.3333	n
15	HiA_sRNA_00218	GAGAGATTGCGAAAACACTAATTAGAGAATAGACCTAGAATAACTAGGTCTAGTTT	y	1	n		y	ispC	23	14	7	12	56	33.9286	n
16	HiA_sRNA_00236	TGATCTTGAAAAGCCCGTTTTCAGGATACTCAAACAGAATATCAAGGACATAAATGAGTTGAGCAGTATAACTACTCAACTGGTTCTTGGCAAGAAAAATGTT	n		n		n		38	28	17	20	103	35.9223	y
17	HiA_sRNA_00270	GGACGAACCCATCCACACTATTCAGATAGAATGGCAGATAGGCGG	n		n		n		15	7	11	12	45	51.1111	y
18	HiA_sRNA_00303	AAAACTAACACCAATCACAATTCTAACTTCAAATATAGAAAAGGAGGTGCAAGTTACCTGTTATATAGTCTCCAAATCGGAAAC	n		n		n		36	20	17	11	84	33.3333	y
19	HiA_sRNA_00336	AAATGATCTGCACCCCAAAAGCTGGACTAAA	y	1	n		n		13	5	8	5	31	41.9355	n
20	HiA_sRNA_00377	CAAAAAATAACGACGCACTTGGAAACTTAAAAAACTTCACAACAGTGCGTCGTTGTGTGCGGTGCATT	y	10	n		n		24	16	14	14	68	41.1765	n
21	HiA_sRNA_00426	AAAAAATAACGACGCACTTGGAAACTTAAAAAACTTCACAACAGTGCGTCGTTGTGTGCGGTGCATT	y	10	n		n		24	16	13	14	67	40.2985	n
22	HiA_sRNA_00435	TATGACCGCACTTTTAAGCAGGGATTACCAAACAGAAAATTAT	n		n		n		17	11	8	7	43	34.8837	y
23	HiA_sRNA_00470	ACTAAAAAGGCTAAGCCAGTAAAAAACTGAGCTTAGCCCCCAAACTAAATTTTT	n		n		n		23	12	12	7	54	35.1852	y
24	HiA_sRNA_00476	GTTACAAAAAAGGCGACTAAGCAATTTGCCCACCGCCTTTTTTAAGCTAATTATTT	y	1	n		y	glpT	18	18	12	8	56	35.7143	n
25	HiA_sRNA_00487	TATGATGTTGTGTTTGCATATTTTTGTTGTGGGTG	n		n		n		4	19	1	11	35	34.2857	y
26	HiA_sRNA_00504	CGAAAAGCCTCAATGAAACTCACTGAAGCTATAACGCCGACCAAGCACCCTCGATCCACTTGGCTC	y	1	n		n		21	11	23	11	66	51.5152	y
27	HiA_sRNA_00507	GGTGAGATGGCCGAGCAGGCTGAAGGCGCTCCCCTGCTAAGGGAGTATGGGGTTAAAAAGCTCCATCGAGGGTTCGAATCCCTCTCTCACCGCCAT	n		y	tRNA	y	-	21	19	26	30	96	58.3333	y
28	HiA_sRNA_00530	TGACAAAAGCCACCTTTTAGGTGGCCTTGTCTCAATATTGTAGGGGGGGTTTGATAATGCTATCAGTGACCAACGTTCCCTATCGTCGGGGC	y	2	n		n		20	27	20	25	92	48.913	y
29	HiA_sRNA_00532	TCAAACTCAATCTAAACAAGAAATCCTCGTATTTTAT	n		n		n		15	12	8	2	37	27.027	y
30	HiA_sRNA_00536	TAGTAGTTGTAGGGTGGGCTTTAGCCCACCAACAAACAAT	n		n		n		12	10	8	10	40	45	y
31	HiA_sRNA_00544	GAGAGACAGCGAGTGCTCACACAGAT	n		n		n		9	3	6	8	26	53.8462	n
32	HiA_sRNA_00563	AAAACGTAGGGTGGGCTTTAGCC	n		n		n		6	5	4	8	23	52.1739	n
33	HiA_sRNA_00576	ACCACCTAATTGTTATTTAGTGTGGTGAATTTTTATCCT	n		n		n		9	18	6	6	39	30.7692	n
34	HiA_sRNA_00578	GATTTTGAGTTAGGCATTGACTAAGATTCGCACGTTTTTACGTGCGAATTTTTATTTTCT	y	1	n		y	coaA	13	27	8	12	60	33.3333	y
35	HiA_sRNA_00586	GTCTTAAAGATAAAAGACAGAAGAAGTAAAAAGAAAAGTGCGGAGAAAATTCTCCGCATTTTTTTATTCTATATCTGAT	n		n		n		33	23	9	14	79	29.1139	n
36	HiA_sRNA_00605	CTAATAAAAAGTGCGGTTAATTTTTACCGCACTTTTGTTATCTACTTAATTGAT	y	2	n		n		16	23	8	7	54	27.7778	n
37	HiA_sRNA_00618	TAATTTGCTGAAATATTGGGCTCTGCATAATGTAGAGCTCAATTATTTATA	y	1	n		n		16	20	6	9	51	29.4118	y
38	HiA_sRNA_00644	GATTATAGAATTTAGTCCTTAAACAAATGTATC	n		n		n		13	12	4	4	33	24.2424	n
39	HiA_sRNA_00654	GGGAGCTGCCGAAGGTTGAGGGGAGATATAGAAAGCCCCCTTCCGTCCTTCGGGCATCTTCCCCCACAAGTAAGGGAAGTT	y	1	n		n		19	16	21	25	81	56.7901	y
40	HiA_sRNA_00666	CCATTATGAGCCGTTCGCGACTCATATTTTTGTGTGGTGCAATGAATTTTGCACTAAAAATTATCGGGGAGCTATTTA	n		n		n		20	28	13	17	78	38.4615	y
41	HiA_sRNA_00674	CACTTTTTGAAAGTGCGGTTTTTTTGTTTC	n		n		n		4	16	4	6	30	33.3333	n
42	HiA_sRNA_00710	AATTGGTTCCTTAGGTTATTTGCCCCACATTTATTGTGGGGTTTTTTCTTGC	y	1	n		n		7	25	9	11	52	38.4615	n
43	HiA_sRNA_00731	AATAAAAGGGCTTGTTTTCACAAGCCCTAAAACATTCAATTAATTGACCGCTCTTTCTGATTTACTCGTCACTTTACGGCGTGGTGCTTTAGGTTTAGCCTTCACTTTAACAAACTCAATGCCCTCTGGTGG	y	1	n		y	lon	33	45	31	23	132	40.9091	y
44	HiA_sRNA_00756	GAAGGCGAGCCAATTGACTCGCCCGATTTCACACTAAAGTGCG	y	1	n		n		12	8	12	11	43	53.4884	y
45	HiA_sRNA_00817	AGCGTACTAATTCTTAGTATTTCTAATACTTGAAAAACAGGATCCATTTTTTATTGGATTCTGTTTTGTTT	y	1	n		y	pal	19	33	9	10	71	26.7606	y
46	HiA_sRNA_00831	ATACACGGAAGCCCAATCTAAAATGATCGGGCCCCGGAATCAGCAGCAAACATAACATTTCAGT	n		n		n		24	11	17	12	64	45.3125	y
47	HiA_sRNA_00868	TGCCGAGAGGGCGGAGAATAAAATACCCGAAAGGGGAATAATCCCG	n		n		n		17	5	9	15	46	52.1739	n
48	HiA_sRNA_00905	GCGGTCAATTTTGACCGCATTTTTAGCG	y	2	n		n		5	10	6	7	28	46.4286	n
49	HiA_sRNA_00944	ACAAAAAGTAGAAGAAGTTAGCCAAGAGTTAGATAAAATCTTAGGCTAAAAATAATCTAAAAATTAACCGCACTTTAGAAAATATAATTAATCTGCACCTTAAAGGCTGAATAAATCAGCGAATTAAAGTGCAGATTTTTTTATAAAC	y	2	n		y	adk	68	40	19	21	148	27.027	y
50	HiA_sRNA_00952	ACGGAGGAATGGTCGAGTGGTTGAAGGCACCGGTCTTGAAAACCGGCGAGGGTTTACGCCCTCCTAGGGTTCGAATCCCTATTCCTCCGCCATCAA	n		y	tRNA	y	tRNA-Ser; tRNA-Ser	21	21	26	28	96	56.25	y
51	HiA_sRNA_00996	TTACTTCGTTAGAAAATAAATCTAATTAAGGTGCAGAATAAAATAAAGT	y	1	n		n		23	15	4	7	49	22.449	n
52	HiA_sRNA_01015	AAAAAATCTGACAGGCACGCAATTTAATTGGTGTCTGTCAGATT	y	1	n		n		15	13	7	9	44	36.3636	y
53	HiA_sRNA_01023	GCGTGAATGTACTGAAGTTTACATCGCCTTGCACGATAGGTTAAATCAATCTATATTTAATA	n		n		n		20	21	10	11	62	33.871	y
54	HiA_sRNA_01027	AAAAGTGAGGGGTAATTACTTACCCCTTTATTTTTATAACAATCCTGCGATTTTTAGCGCATCTTCTACTTTTGGTTG	y	1	n		y	dapA	19	32	14	13	78	34.6154	y
55	HiA_sRNA_01049	ACAAGAGATGGCGGTAACCATCTCTTGTCGGCATCAACTACTAATAGCC	y	1	n		n		15	11	13	10	49	46.9388	y
56	HiA_sRNA_01051	AACTCAGGATCTACGAAATAGCCCGACAGCGGCAACTGG	n		n		n		13	5	11	10	39	53.8462	y
57	HiA_sRNA_01052	TATCACAAAGCCTGTATTTTTTAACAGGCTTTTTTGTTCA	y	2	n		n		10	18	7	5	40	30	n
58	HiA_sRNA_01057	TCATAATTGATGAAAGTGCGGTAGAAAAATAAAACGTTTTTTGACCGCACTTTTTAATA	y	2	n		y	tgt	22	20	7	10	59	28.8136	n
59	HiA_sRNA_01081	CCCTGTGCCTTATATCTCCGCCCTGAAGGACGGAGTTTTACGGCACAGGGCTGATAAAT	y	1	n		n		13	15	16	15	59	52.5424	n
60	HiA_sRNA_01096	GAGAAAGTCTGAGTAGGCAAGACAGGAAAGTGAAAGAGAGAACTGAAAAGGAAACTCTAAAAACAAACCTGTTTTGTAA	n		n		n		37	13	9	20	79	36.7089	y
61	HiA_sRNA_01123	CATTGGGGACAACTCCTACATCGTCCCCTTGCGATTATCTTAGATAACTGTTCCGGAACAGCTAA	n		n		n		17	18	18	12	65	46.1538	y
62	HiA_sRNA_01181	ATATCTACAGTGAGGAAGATTGAACAATCTTCCTCTTTTTCTATCACGCTATTTCATTC	y	1	n		n		16	23	13	7	59	33.8983	n
63	HiA_sRNA_01215	CGGTCTGGCTCACTAATAATAGTAGTACGACAAGGATAATGAGTTTA	n		n		n		16	13	7	11	47	38.2979	y
64	HiA_sRNA_01216	TCTTCAAACGTTGCGAAAAAGCGCAACACTCGCTTTCAAG	n		n		n		13	9	11	7	40	45	y
65	HiA_sRNA_01224	GTCCCTGATTCTTTGAGTCGGGGATTTTTTATATGA	y	1	n		n		6	16	5	9	36	38.8889	y
66	HiA_sRNA_01232	CCTGTTTCTAAATTGACTGTACTTTTTATTTCT	n		n		n		6	18	6	3	33	27.2727	y
67	HiA_sRNA_01281	AAAAAAATGGCTAGTGCGAAAGGAGTGGGGGAATGCACTAGCCAAGTTTCATTACTATTAAATTAC	y	1	n		n		25	16	9	16	66	37.8788	y
68	HiA_sRNA_01288	TTAGGTTAATTCATTTGAGATGAAGTAGTATAAGGGTTAAAATCCTCAGTCTGATTAGATTGAGGATTTTTCTTTTTT	y	1	n		y	htpG	22	34	6	16	78	28.2051	y
69	HiA_sRNA_01291	AACGCGTGCGTGAATTTTTTCAAATACACGCACG	n		n		n		10	9	8	7	34	44.1176	n
70	HiA_sRNA_01312	CTATAAGTAACTTTAGCGCATTGATAAGATTGCCCCTTAATGGGGCAATTTTTTTGTCT	y	1	n		n		15	23	10	11	59	35.5932	y
71	HiA_sRNA_01313	TAAAAAATCCCCTGATTATCGCTAATCAGGGGATTCATCGCTCAATGGCGTTTAAAAACTCATCTTTCGATGATGATCGCTCTAAGGCGTTACGCTC	y	2	n		n		27	29	23	18	97	42.268	n
72	HiA_sRNA_01317	CCATTCAAATCTCCCCTAGCCCCTCTTTACAA	n		n		n		8	9	14	1	32	46.875	y
73	HiA_sRNA_01324	AATCTAACCTTAAAGGAGATGCTGAAACCCTGCATC	y	2	n		n		13	8	9	6	36	41.6667	n
74	HiA_sRNA_01326	AATGCTCGTTGTTACCAGCTACGCAGAACGAGCCTGCATATAGCCATACGCCGCCTACCTTGCGC	n		n		n		15	14	22	14	65	55.3846	y
75	HiA_sRNA_01360	CTTTTCAAGTGATGAATAATGATTGAATTTTGACTTTATGACCCCACTATTTAGTGGGGTTATTTTTTGGAA	y	1	n		y	-	19	31	8	14	72	30.5556	y
76	HiA_sRNA_01375	AAGGAAAAGTGCGGTTATTTTTAACCGCACTTTTTGTTCATATTCTAA	y	2	n		n		14	19	7	8	48	31.25	n
77	HiA_sRNA_01395	TTTTAACCGCACTTTTTCTTTTTCAGGATTTCAGCTTATTTGCCAAATCCTTTAAATAAGACTT	n		n		y	-	16	29	13	6	64	29.6875	y
78	HiA_sRNA_01456	CCGTTGGGGTAGTGTGAGATTCCTCAAAGAGGAACGACTATAACTAGCCGTGGGTATACTTACCCACGGTTACGCTAGT	n		n		n		20	20	17	22	79	49.3671	y
79	HiA_sRNA_01458	CTATTTTTGTCTATAAAGTGCGGTCAATTTTTTATGA	n		n		y	-	9	18	4	6	37	27.027	n
80	HiA_sRNA_01465	TTCTCTGCAAAATAAGATAGAATCTTAATAGTCATGAAGGGCGGATATTTCTGCCCTTTTGTTATTA	y	1	n		y		20	25	10	12	67	32.8358	y
81	HiA_sRNA_01467	TGGCGGCGGCTACGGCTGCTTTTTTAGGGTCAAGTGCGGTTGAATTTTCTTGTGTTTTTTCTACCGCACTTTTTGTTTTTT	n		n		y	modA	8	38	14	21	81	43.2099	y
82	HiA_sRNA_01472	TTAAACGATTAGCTGCGTAATATTTGGATTAACAATACTCAACTTGATTTATGAATTAAA	y	1	n		n		23	22	7	8	60	25	y
83	HiA_sRNA_01474	ATAATGACCGCACTTTATACAATAAAAAGTGAGCCTTGTTGCTCACTTTTCTATTTT	y	4	n		y	-	17	22	11	7	57	31.5789	y
84	HiA_sRNA_01481	GTAAAAGCCCGTACTGAACTTTAACCCACACAGTAAATA	n		n		n		16	8	10	5	39	38.4615	n
85	HiA_sRNA_01502	AAAATTAACCGCACTTTAAATATTTAAAAAGAATATTCCAAAGTGC	y	1	n		n		22	13	7	4	46	23.913	n
86	HiA_sRNA_01512	TGATTTGTCGTGGATTGGCAATGAGCACGAAAAAGGCTGCTTGATATAATATTTTGGCAATCGTAAGATCCAAGCCGTCGGTGCTTTCATAGATGATTCAGTCCGCATTGAAACCTT	n		n		n		32	36	21	28	117	41.8803	y
87	HiA_sRNA_01528	AAAGGCACATTAGTGCCTTTTTTGTTATAG	y	4	n		n		8	12	4	6	30	33.3333	n
88	HiA_sRNA_01537	CATTAATCGGTGGGCTTAAAGCCCACCTACAGATTACA	n		n		y	aceF	12	9	10	7	38	44.7368	y
89	HiA_sRNA_01540	TTTTAAAGTGCGGTCATAAAACACAATGTTTTTTGACCGCAGTTTTCATCAATTACGCATAAAGCGGATTGATACGATCTACATTCAAACCGAATTTCGCAATCGCATCTGCAACCACT	y	1	n		y	aceE	38	36	27	18	119	37.8151	y
90	HiA_sRNA_01549	AAAATAGAATAAAAACGGTGGGCTGAAGCCCACC	y	1	n		n		15	4	7	8	34	44.1176	n
91	HiA_sRNA_01556	AAAGGGCGTGGAAACACGCCCTTTTGGTGTATT	y	2	n		n		8	9	6	10	33	48.4848	n
92	HiA_sRNA_01565	TTTGGTTTAGAGTTTGTTTGTCTCCTTTTACAAATTCTAAATTAGCA	n		n		n		11	23	6	7	47	27.6596	n
93	HiA_sRNA_01586	ATTTCCTACAAATTCAATTCCACAAAGGTGGAAAAGAAGGGAACCCAATTTGTTCTT	n		n		n		21	16	11	9	57	35.0877	n
94	HiA_sRNA_01596	ATTGGCCGCACTTTTGATCTGCACTCCAAAAGTTGGATTAAATAACCAACTAAGGTGCAGATTTTTTATGAC	y	1	n		1y, 1n	-	22	23	14	13	72	37.5	y
95	HiA_sRNA_01604	ATCAAAGGGCGAAAGCCCTTTTTTGTTA	y	2	n		y	-	8	9	5	6	28	39.2857	n
96	HiA_sRNA_01618	GAAAAGTGCGGTGAAATTTCACCGCAGTTTTTTACTGTCTCGCCAATCTTAAATTTTC	y	2	n		y	queF	15	21	12	10	58	37.931	y
97	HiA_sRNA_01620	AAAATAACGCCCGAAAGGGCGTTTTTATTTAGAGGAAATATTGCACAGAATCAGA	y	2	n		n		22	13	8	12	55	36.3636	n
98	HiA_sRNA_01623	AGATTCCTTTGATGAAGCTAAACTTTAGAGATTTTATTCATAAATTCCTTTTTAATGCCCCT	n		n		n		18	26	11	7	62	29.0323	n
99	HiA_sRNA_01633	ACTTACCGCACTTTTTGCATTTATACATCGCCACGATAATTTCGTGGCGGTTTTTTATGGCAAG	y	1	n		n		14	24	14	12	64	40.625	y
100	HiA_sRNA_01684	AGACTTTCTTTACTCCTAAATTTATATGACACCTAAACCGCCTTCGTGGCGGTTTT	y	1	n		y	-	13	21	14	8	56	39.2857	y
101	HiA_sRNA_01686	GAATAACTTGGAGCGGTGGAAAGACAGACGCTCAATGCGTCTTTTTTTATCG	n		n		n		14	15	9	14	52	44.2308	y
102	HiA_sRNA_01687	ATGATGAACTGTTTAGGAGGATCGAAAGATCCGCCGTTTTGCTCTAAG	n		n		n		13	14	8	13	48	43.75	n
103	HiA_sRNA_01717	AAAAAATAAAGCCTTTCCGAAGAAAGGCTTTGATGAGTTAAACATTAAAATTGT	y	2	n		y	ftsH	24	15	6	9	54	27.7778	n
104	HiA_sRNA_01736	AATAGCTAACACTTGTTCGCAAAACTTGTCGGAGCAGTCACTCTTAGAAATTAT	n		n		n		18	16	11	9	54	37.037	y
105	HiA_sRNA_01739	GCTTTTCAGCGTCCTAATTCTTCTTTATCTAAACTTTA	n		n		n		8	18	9	3	38	31.5789	y
106	HiA_sRNA_01743	TTTTCAAAAGCAGTTAGGCTGCGTAGTGTGCCTAACATGCAGTTGTCTTTTCATTTAA	n		n		n		14	22	10	12	58	37.931	y
107	HiA_sRNA_01746	ATAACAAAGGGCGTATCAGATACGCCCTTAATCTACGACTTTGATTAAATTTCGTCAATAATTCGATAAACCCAATTTTCCAGTGGGTCATTCAGACGTTTCATCTCTGCAC	y	2	n		y	-	34	35	26	17	112	38.3929	y
108	HiA_sRNA_01787	ACCAATACGATTCATCAAATGAAACGTCGCAATAAAATGAAATGGGCAGCGTAGTTAAAAGCAAATAAAAAAGTGCGGTGAAAATCAACCGCACTTCTATCTAGTAT	y	2	n		y	-	46	23	19	19	107	35.514	y
109	HiA_sRNA_01797	GCCCACTCGAAAATAATCCCTTCCCCACATTCCAAA	n		n		n		12	7	15	2	36	47.2222	y
110	HiA_sRNA_01813	ATAAAAAAAGTGCCCCATTGGAGCACTACTCGGAAAGCAAAATAGATGTCGGCTATTTAAGATAGCACTTGTTTTTAGTGGTA	y	1	y	Aggregatibacter sRNA 20	n		29	23	13	18	83	37.3494	y
111	HiA_sRNA_01827	TTTACTGTGTGGGTTAAAGTTCAGTACGGGCTTTACCCA	n		n		n		8	14	7	10	39	43.5897	n
112	HiA_sRNA_01843	ATAAAAAAAACGCCTATTTGTGGGGAAATAGGCGGGAATGTTGGAGTGATTATCTAATATTGTTGTTGGAATGATT	y	1	n		n		25	25	5	21	76	34.2105	y
113	HiA_sRNA_01890	CCCTGAATGCTGACAGGGGTTAAAAGCCCTACTGACCATTAGTC	n		n		n		12	10	12	10	44	50	y
114	HiA_sRNA_01891	ATATCATAATTTTTGTGTTGTTAATGCTTTTAAGCTCCCCAGCATATTAAGCATAACCGACTAAACACAAGGGGTAGGCAACTGCCCCTTGCTCT	y	1	n		n		27	30	22	16	95	40	y
115	HiA_sRNA_01895	ATGAAAAACGGCCGTTTAAAACGACCGAGGTATTCTACAAAAATACAGCCAAAAAGAAAACGTT	y	1	n		n		30	11	12	11	64	35.9375	y
116	HiA_sRNA_01906	TGTTTGCATATAGTTCGGGAAACCGAACTTGAGTAACAATTTGTTACTCATTTACTTCCTGTATATTATTAAACCGATTTGGTTAAACGCTGCTCTCATTGAGTGGCGTTTTTTTCATCC	y	1	y	GcvB RNA	n		29	48	22	21	120	35.8333	y
117	HiA_sRNA_01915	GCCTGACTGGCGGGTCAGGCAGTAACTCAATCTCGATCAGCTTTGTTTAA	n		n		n		11	14	12	13	50	50	y
118	HiA_sRNA_01916	AATGATTATTATCGGGTTCTTGTTGCTGTCCTTTAGCTCCCCAGCTTGGTAGCAACCTAA	n		n		n		12	22	14	12	60	43.3333	y
119	HiA_sRNA_01933	ATCTTCTAACCAATTCCCCTCTTTTAACTCTTTTAAAGAGGGGAACTTTTTCTATAATCA	n		n		n		17	24	14	5	60	31.6667	n
120	HiA_sRNA_01938	AAATAAAAAAGACTGAAGTTTAAACCTTCAGCCTTTTTGAACCCTAACGAATTTACTTTCTACTCTACCTGTTGGAGCAACCTGCAATCGCTTAACAGAT	y	1	y	Haemophilus regulatory RNA responsive to iron	n		34	30	23	13	100	36	y
121	HiA_sRNA_01946	AATATAAAAAGTGAGGTCATAAAAACATTA	y	1	n		y	rapZ	17	7	2	4	30	20	n
122	HiA_sRNA_01971	CTAATTCAAGAGCAGATTGAAGTGCGGTTAT	n		n		n		10	9	4	8	31	38.7097	y
123	HiA_sRNA_01982	TTATTAATGTAGTAAATCCCCTATAGCTTATCGGCATAGGGGATTTTATTTAAT	y	2	n		y	xylB	16	22	7	9	54	29.6296	n
124	HiA_sRNA_01990	TAAAAGTGCGGTAAAAATTCACCGCACTTTATTCTTTTTTGTTTATCCCTCAATCCCTTCAAACAGTGCTGTGCTTAAGTAGCGTTCAGAAGCTGA	y	4	n		1y, 2n	cysK	26	33	21	16	96	38.5417	n
125	HiA_sRNA_02024	CCGTTAAATGATAAATTTAACGGGGATTTTTTTACCG	n		n		n		11	14	5	7	37	32.4324	n
126	HiA_sRNA_02036	AAAAAATGCTCCCTTTCTCTTAATCAACTTAA	n		n		n		12	11	8	1	32	28.125	n
127	HiA_sRNA_02039	ATTAATAACCAACTGGTGTGGC	n		n		n		7	6	4	5	22	40.9091	y
128	HiA_sRNA_02072	CTTTGGGGTAGAGCTTGACGTTCCCCAGAGGGGAACTATTATTACT	y	1	n		n		10	14	9	13	46	47.8261	y
129	HiA_sRNA_02073	GTGGGTATACTTACCCACGGTTGATTGCCTAGGGTAGGTACA	y	4	n		n		9	12	8	13	42	50	y
130	HiA_sRNA_02074	GTATACCCACGGCAGTAAAATAAAGAAAAGGCACATTCCGTGCCTTTCTTTTTGCCT	y	2	n		n		17	16	14	10	57	42.1053	y
131	HiA_sRNA_02100	TCTATGGTGGACTGGGTAGAAATCCCGCAGGGATGCGTGCAGTAAGCCACTTGCTGTTAA	n		n		n		14	15	12	19	60	51.6667	y
132	HiA_sRNA_02106	TAAGCTCGAGCTTACGGTTCGGATTGTTTAAAGCTGGTTAAACCTAGCTTGCTACCTCGTCAGGTCGCGCTAA	n		n		n		16	22	17	18	73	47.9452	y
133	HiA_sRNA_02122	GATATAAAAACACCGCACTTTTATACAAAGTGCGGTGAGATTT	y	1	n		n		16	12	7	8	43	34.8837	y
134	HiA_sRNA_02125	TAATAGTAGTAATGAATCTGCACCCAAAAGTTAGGCTAAGGTTTAACTGATTAGGGTGC	y	2	n		n		20	17	8	14	59	37.2881	y
135	HiA_sRNA_02148	CTATAAAAGAAGGGATGATTGACGAAAAATCAACCATCCCTTTTTACATTATTGAAGCAC	y	2	n		y	glyS	24	16	11	9	60	33.3333	y
136	HiA_sRNA_02152	ACGTGGGGTGTGTGAATTCAAAATTCACGCACCATTTTTTATACGTACGTGAAAT	y	1	n		n		16	18	9	12	55	38.1818	y
137	HiA_sRNA_02171	AGGCTTAATCGGGGTGCCAAACGGTCGATTAGCTGATATG	n		n		n		10	10	7	13	40	50	y
138	HiA_sRNA_02196	TTATTTTCTTTCGTTGATTATATGTTTAGCGGCGATTAATATCGCCGCTTATTTTTT	y	1	n		n		10	30	8	9	57	29.8246	y
139	HiA_sRNA_02203	GTAGTTTAGTTGTAGTTTCATAATTTTATCCTTATTTTTGCCCACATTTATGTGGGCTTTTTTAT	y	1	n		y	-	12	35	8	10	65	27.6923	n
140	HiA_sRNA_02244	TAATGAAGATAAAGGGTTGAGTGTAA	n		n		n		11	7	0	8	26	30.7692	n
141	HiA_sRNA_02256	ACCTTATCTAGTGATGTGAGTGAAGCTGCCTCTGGCGGTGAAGATTATTCCGGCGAATAAGATACGTTAAATAAGGCAGGCGGAAGTCTGCCTTTTGTTT	y	2	n		y	-	25	30	17	28	100	45	y
142	HiA_sRNA_02269	TCAATTTTTGTTGTAGTCTAAGGGGAAGTGGATCTTCCCCTTTTTAAAGA	y	1	n		n		12	20	7	11	50	36	y
143	HiA_sRNA_02278	CCCCAAAATAAAACCGCACTTCACGACGCTATTTGAGAAGTGCGGTTAAAATTTAAGTTATTTCAGATTATTCAAAAAACA	y	2	n		n		32	22	16	11	81	33.3333	n
144	HiA_sRNA_02287	AAACTAGACCTAGTTATTCTAGGTCTATTCTCTAATTAGTGTTTTCGCAATCTCTCTTGCTTG	y	1	n		y	ispC	14	27	13	9	63	34.9206	y
145	HiA_sRNA_02307	ACATTTTTCTTGCCAAGAACCAGTTGAGTAGTTATACTGCTCAACTCATTTATGTCCTTGATATTCTGTTTGAGTATCCTGAAAACGGGCTTTTCAAGATC	n		n		n		26	38	20	17	101	36.6337	y
146	HiA_sRNA_02342	CCGCCTATCTGCCATTCTATCTGAATAGTGTGGATGGGTTCGTCC	n		n		n		7	15	12	11	45	51.1111	n
147	HiA_sRNA_02400	TTTAGTCCAGCTTTTGGGGTGCAGATCATTT	y	1	n		n		5	13	5	8	31	41.9355	n
148	HiA_sRNA_02405	TAAAATCGTACCTAAAAGCTGGTGGATAAGCCCAACT	y	1	n		n		14	8	8	7	37	40.5405	y
149	HiA_sRNA_02440	ATCTGTGTGGGCACTTGTTGATTGACTTGTTTTAAA	n		n		n		7	16	4	9	36	36.1111	n
150	HiA_sRNA_02441	AATGCACCGCACACAACGACGCACTGTTGTGAAGTTTTTTAAGTTTCCAAGTGCGTCGTTATTTTTT	y	10	n		n		16	24	14	13	67	40.2985	n
151	HiA_sRNA_02540	AAAAATTTAGTTTGGGGGCTAAGCTCAGTTTTTTACTGGCTTAGCCTTTTTAGT	n		n		n		12	23	7	12	54	35.1852	y
152	HiA_sRNA_02545	TTCTATTATAACCGTAGGTAAGTTTACTTACGGTTATTAA	n		n		n		12	17	5	6	40	27.5	n
153	HiA_sRNA_02548	AATAATTAGCTTAAAAAAGGCGGTGGGCAAATTGCTTAGTCGCCTTTTTTGTAAC	y	1	n		y	glpT	17	18	8	12	55	36.3636	y
154	HiA_sRNA_02560	CACCCACAACAAAAATATGCAAACACAACATCATA	n		n		n		19	4	11	1	35	34.2857	n
155	HiA_sRNA_02570	GCGAGCCGTTGATTGTTGATTAGTAG	n		n		n		5	9	3	9	26	46.1538	n
156	HiA_sRNA_02575	GAGCCAAGTGGATCGAGGGTGCTTGGTCGGCGTTATAGCTTCAGTGAGTTTCATTGAGGCTTTTCG	y	1	n		n		11	21	11	23	66	51.5152	y
157	HiA_sRNA_02581	GGCGGTGAGAGAGGGATTCGAACCCTCGATGGAGCTTTTTAACCCCATACTCCCTTAGCAGGGGAGCGCCTTCAGCCTGCTCGGCCATCTCACC	n		y	tRNA	y	-	18	20	30	26	94	59.5745	y
158	HiA_sRNA_02608	GCCCCGACGATAGGGAACGTTGGTCACTGATAGCATTATCAAACCCCCCCTACAATATTGAGACAAGGCCACCTAAAAGGTGGCTTTTGTCA	y	2	n		n		27	20	25	20	92	48.913	y
159	HiA_sRNA_02610	ATAAAATACGAGGATTTCTTGTTTAGATTGAGTTTGA	n		n		n		12	15	2	8	37	27.027	n
160	HiA_sRNA_02614	ATTGTTTGTTGGTGGGCTAAAGCCCACCCTACAACTACTAATC	n		n		n		11	13	11	8	43	44.186	n
161	HiA_sRNA_02639	GGCTAAAGCCCACCCTACGTTTT	n		n		n		5	6	8	4	23	52.1739	n
162	HiA_sRNA_02651	AGGATAAAAATTCACCACACTAAATAACAATTAGGTGGT	n		n		n		18	9	6	6	39	30.7692	n
163	HiA_sRNA_02653	AAGAAAATAAAAATTCGCACGTAAAAACGTGCGAATCTTAGTCAATGCCTAACTCAAAATC	y	1	n		y	coaA	28	13	12	8	61	32.7869	y
164	HiA_sRNA_02660	AGAATAAAAAAATGCGGAGAATTTTCTCCGCACTTTTCTTTTTACTTCTTCTGTCTTTTATCTTTAAGAC	n		n		n		19	30	13	8	70	30	n
165	HiA_sRNA_02677	ATCAATTAAGTAGATAACAAAAGTGCGGTAAAAATTAACCGCACTTTTTA	y	2	n		n		22	14	7	7	50	28	n
166	HiA_sRNA_02691	TATAAATAATTGAGCTCTACATTATGCAGAGCCCAATATTTCAGCAAATTA	y	1	n		n		20	16	9	6	51	29.4118	n
167	HiA_sRNA_02717	GATACATTTGTTTAAGGACTAAATTCTATAATC	n		n		n		12	13	4	4	33	24.2424	n
168	HiA_sRNA_02728	AACTTCCCTTACTTGTGGGGGAAGATGCCCGAAGGACGGAAGGGGGCTTTCTATATCTCCCCTCAACCTTCGGCAGCTCCC	y	1	n		n		16	19	25	21	81	56.7901	y
169	HiA_sRNA_02738	TAAATAGCTCCCCGATAATTTTTAGTGCAAAATTCATTGCACCACACAAAAATATGAGTCGCGAACGGCTCATAATGG	n		n		n		28	20	17	13	78	38.4615	y
170	HiA_sRNA_02784	GCAAGAAAAAACCCCACAATAAATGTGGGGCAAATAACCTAAGGAACCAATT	y	1	n		n		25	7	11	9	52	38.4615	n
171	HiA_sRNA_02807	AGTTTGTTAAAGTGAAGGCTAAACCTAAAGCACCACGCCGTAAAGTGACGAGTAAATCAGAAAGAGCGGTCAATTAATTGAATGTTTTAGGGCTTGTGAAAACAAGCCCTTTTAT	y	1	n		y	lon	41	30	18	26	115	38.2609	y
172	HiA_sRNA_02824	TAAACAAGGTGCGCTGAATTTACAGTGGACGTTTTAAGTTAA	n		n		n		14	13	5	10	42	35.7143	y
173	HiA_sRNA_02827	CTAAAAGGACTAAGCCCTGTAGATTA	n		n		n		10	6	5	5	26	38.4615	y
174	HiA_sRNA_02831	CGCACTTTAGTGTGAAATCGGGCGAGTCAATTGGCTCGCCTTCGTTAT	y	1	n		n		9	15	11	13	48	50	y
175	HiA_sRNA_02894	TGAAAACAAAACAGAATCCAATAAAAAATGGATCCTGTTTTTCAAGTATTAGAAATACTAAGAATTAGTACGCTA	y	1	n		y	pal	35	20	10	10	75	26.6667	n
176	HiA_sRNA_02925	CCTTTTAAGTATGGTTTAATTGGAATGAAAAACCCCGAGAGTTCGCTGCTTTCGGGGTTTTAGTTT	y	2	n		n		15	25	10	16	66	39.3939	y
177	HiA_sRNA_02942	CCGGGATTATTCCCCTTTCGGGTATTTTATTCTCCGCCCTCTCGGCA	n		n		n		5	17	16	9	47	53.1915	y
178	HiA_sRNA_02948	TGTGAATTTTGGGTGTAGCAATCCGCCGCACGGATTTCTTTGGGAAAAGTGCGGTCGGATTTTTC	n		n		n		12	22	11	20	65	47.6923	y
179	HiA_sRNA_02949	GCAGTGAGTGGAGAAAGGAAACACCGCTTGTCACGTGTACATCGCTATCTTACAGGCAATAA	n		n		n		20	13	13	16	62	46.7742	y
180	HiA_sRNA_02980	ATACCCATCTATCCCCCAAACACCGCTAAAAATGCGGTCAAAATTGACCGC	y	2	n		y	iscA	18	9	18	6	51	47.0588	y
181	HiA_sRNA_03021	AGTTTATAAAAAAATCTGCACTTTAATTCGCTGATTTATTCAGCCTTTAAGGTGCAGATTAATTATATTTTCTAAAGTGCGGTTAATTTTTAGATTATTTTTAGCCTAAGATTTTATCTAACTCTTGGCTAACTTCTTCTACTTTTTGT	y	2	n		y	adk	41	68	21	19	149	26.8456	y
182	HiA_sRNA_03068	AATAAAATATGGCGGACTAAAGCCCGCCT	y	1	n		n		11	5	7	6	29	44.8276	n
183	HiA_sRNA_03069	AACTTTATTTTATTCTGCACCTTAATTAGATTTATTTTCTAACGAAGTAA	y	1	n		n		16	23	7	4	50	22	y
184	HiA_sRNA_03097	TATTAAATATAGATTGATTTAACCTATCGTGCAAGGCGATGTAAACTT	n		n		n		17	17	6	8	48	29.1667	y
185	HiA_sRNA_03102	AACCAAAAGTAGAAGATGCGCTAAAAATCGCAGGATTGTTATAAAAATAAAGGGGTAAGTAATTACCCCTCACTTTT	y	1	n		y	dapA	32	19	12	14	77	33.7662	y
186	HiA_sRNA_03127	CCAGTTGCCGCTGTCGGGCTATTTCGTAGATCCTGAGTT	n		n		n		5	13	10	11	39	53.8462	n
187	HiA_sRNA_03128	TGAACAAAAAAGCCTGTTAAAAAATACAGGCTTTGTGAT	y	2	n		n		17	10	5	7	39	30.7692	n
188	HiA_sRNA_03156	ATTTATCAGCCCTGTGCCGTAAAACTCCGTCCTTCAGGGCGGAGATATAAGG	y	1	n		n		13	13	13	13	52	50	y
189	HiA_sRNA_03196	TTAGCTGTTCCGGAACAGTTATCTAAGATAATCGCAAGGGGACGATGTAGGAGTTGTCCCCAATG	n		n		n		18	17	12	18	65	46.1538	y
190	HiA_sRNA_03257	GAATGAAATAGCGTGATAGAAAAAGAGGAAGATTGTTCAATCTTCCTCACTGTAGATAT	y	1	n		n		23	16	7	13	59	33.8983	n
191	HiA_sRNA_03268	TTTCAATTTTTAGGCAATTTGCGTCTGTTTGAGCGTAGCGAGTTCAGCAAATTGCCGTTAAGA	n		n		n		15	23	10	15	63	39.6825	y
192	HiA_sRNA_03291	TTAAACTCATTATCCTTGTCGTACTACTATTATTAGTGAGCCAGACCG	n		n		n		13	17	11	7	48	37.5	y
193	HiA_sRNA_03292	CTTGAAAGCGAGTGTTGCGCTTTTTCGCAACGTTTGAAGA	n		n		n		9	13	7	11	40	45	y
194	HiA_sRNA_03300	TCATATAAAAAATCCCCGACTCAAAGAATCAGGGAC	y	1	n		n		16	6	9	5	36	38.8889	y
195	HiA_sRNA_03307	AGAAATAAAAAGTACAGTCAATTTAGAAACAGGTTCTAAA	n		n		n		21	9	4	6	40	25	y
196	HiA_sRNA_03329	TGTGTGAGCACTCGCTGTCTCTCG	n		n		n		2	8	7	7	24	58.3333	y
197	HiA_sRNA_03355	GTAATTTAATAGTAATGAAACTTGGCTAGTGCATTCCCCCACTCCTTTCGCACTAGCCATTTTTTT	y	1	n		n		16	25	16	9	66	37.8788	y
198	HiA_sRNA_03363	AAAAAAGAAAAATCCTCAATCTAATCAGACTGAGGATTTTAACCCTTATACTACTTCATCTCAAATGAATTAACCTAACAACTT	y	1	n		y	htpG	36	24	18	6	84	28.5714	n
199	HiA_sRNA_03366	GCGTGCGTGTATTTGAAAAAATTCACGCACGCGTTTAC	n		n		n		10	11	8	9	38	44.7368	y
200	HiA_sRNA_03384	AAGACAAAAAAATTGCCCCATTAAGGGGCAATCTTATCAATGCGCTAAAGTTACTTATAG	y	1	n		n		24	15	11	10	60	35	n
201	HiA_sRNA_03386	GAGCGTAACGCCTTAGAGCGATCATCATCGAAAGATGAGTTTTTAAACGCCATTGAGCGATGAATCCCCTGATTAGCGATAATCAGGGGATTTTTTA	y	2	n		n		29	27	18	23	97	42.268	y
202	HiA_sRNA_03392	CTCACTTATCCCCCTCTTTTGTAAAGAGGGGCTAGGGGAGATTTGAATGG	n		n		n		11	15	10	14	50	48	n
203	HiA_sRNA_03395	GATGAATCTCGAAGATCGCGGGCGAAGAGGTGAAATAGACTCGGGACTGTGTGCGGTGGGTTCGAGCCCCGCCTAGT	n		n		n		17	15	16	29	77	58.4416	y
204	HiA_sRNA_03399	GAGATGCAGGGTTTCAGCATCTCCTTTAAGGTTAGATT	y	2	n		n		9	13	6	10	38	42.1053	n
205	HiA_sRNA_03401	GCGCAAGGTAGGCGGCGTATGGCTATATGCAGGCTCGTTCTGCGTAGCTGGTAACAACGAGCATT	n		n		n		14	15	14	22	65	55.3846	y
206	HiA_sRNA_03435	TTCCAAAAAATAACCCCACTAAATAGTGGGGTCATAAAGTCAAAATTCAATCATTATTCATCACTTGAAAAG	y	1	n		y	-	31	19	14	8	72	30.5556	y
207	HiA_sRNA_03446	TTAGAATATGAACAAAAAGTGCGGTTAAAAATAACCGCACTTTTCC	y	2	n		n		19	12	8	7	46	32.6087	n
208	HiA_sRNA_03470	AAGTCTTATTTAAAGGATTTGGCAAATAAGCTGAAATCCTGAAAAAGAAAAAGTGCGGTTAAAA	n		n		y	-	29	16	6	13	64	29.6875	y
209	HiA_sRNA_03491	ACAGGTTTTGTTTTTAGAGTTCCCTTTTCAGTTCCCTCCTCTCACTTTCCTATCTTG	n		n		n		7	27	16	7	57	40.3509	y
210	HiA_sRNA_03529	ACTAGCGTAACCGTGGGTAAGTATACCCACGGCTAGTTATAGTCGTTCCTCTTTGAGGAATCTCACACTACCCCAACGG	n		n		n		20	20	22	17	79	49.3671	y
211	HiA_sRNA_03531	ATAAAAAATTGACCGCACTTTATAGACAAAAATAG	n		n		y	-	18	8	5	4	35	25.7143	n
212	HiA_sRNA_03532	AAACTAAAAAATGCGGTAAAATTTACAAAATAATTTACCGCACAAAT	y	1	n		n		25	11	7	4	47	23.4043	n
213	HiA_sRNA_03539	TAATAACAAAAGGGCAGAAATATCCGCCCTTCATGACTATTAAGATTCTATCTTATTTTGCAGA	y	1	n		y	modA	23	20	12	9	64	32.8125	n
214	HiA_sRNA_03542	ACCAAATCTTTCCTTCCCCTGCTTGCGGGGGAAGGTGTCACGAAGCG	n		n		1y, 1n	-	9	11	14	13	47	57.4468	y
215	HiA_sRNA_03547	TTTAATTCATAAATCAAGTTGAGTATTGTTAATCCAAATATTACGCAGCTAATCGTTTAA	y	1	n		n		22	23	8	7	60	25	n
216	HiA_sRNA_03549	AAAATAGAAAAGTGAGCAACAAGGCTCACTTTTTATTGTATAAAGTGCGGTCATTAT	y	4	n		y	-	22	17	7	11	57	31.5789	y
217	HiA_sRNA_03556	TATTTACTGTGTGGGTTAAAGTTCAGTACGGGCTTTTAC	n		n		n		8	16	5	10	39	38.4615	n
218	HiA_sRNA_03578	CGCACTTTGGAATATTCTTTTTAAATATTTAAAGTGCGGTTAATTTTT	y	1	n		n		13	23	5	7	48	25	n
219	HiA_sRNA_03619	GCAGATTTACGTCGCTTAGTAATGTAATCTGTAGGTGGGCTTTAAGCCCACCGATTAATGAAATCTTTG	n		n		y	aceF	18	23	12	16	69	40.5797	y
220	HiA_sRNA_03630	GGTTAATTGGTGGGCTAAAGCCCACCC	n		n		n		6	6	7	8	27	55.5556	n
221	HiA_sRNA_03631	GGGTGGGCTTCAGCCCACCGTTTTTATTCTATTTT	y	1	n		n		4	15	8	8	35	45.7143	n
222	HiA_sRNA_03632	AAATTTTAAAATTCGGGGTAGGGCTTTTAGACCTATTTATTACG	n		n		n		13	17	5	9	44	31.8182	n
223	HiA_sRNA_03641	AATACACCAAAAGGGCGTGTTTCCACGCCCTTTGTTTATGTTAAGAAGAGCGGTGAATTATTTATTATCT	y	2	n		y	dnaK	20	24	12	14	70	37.1429	y
224	HiA_sRNA_03652	GTTAAAAATAAAGCCCATCAACATGATGGGCTCAAAATCTT	y	1	n		n		17	10	8	6	41	34.1463	y
225	HiA_sRNA_03667	ATACTGTTTTATGCTAAAGGGTTTACTTTAATTGTCGTTGAACTCACAATTGAT	n		n		n		15	23	7	9	54	29.6296	n
226	HiA_sRNA_03683	GTCATAAAAAATCTGCACCTTAGTTGGTTATTTAATCCAACTTTTGGAGTGCAGATCAAAAGTGCGGCCAAT	y	1	n		1y, 1n	-	23	22	13	14	72	37.5	y
227	HiA_sRNA_03693	CAACAAAAAAGGGCTTTCGCCCTTTTATTATG	y	8	n		y	-	10	10	7	5	32	37.5	n
228	HiA_sRNA_03694	TAACAAAAAAGGGCTTTCGCCCTTTGATTATGCTCTGTCAATGATTGGGTTTGGAGTGTCCCATTCGCGTGGGAACG	y	2	n		y	-	17	24	15	21	77	46.7532	y
229	HiA_sRNA_03700	AAGACTTCGCTTTTGTAACTGTAACGGACGATTAGATGC	n		n		n		11	12	7	9	39	41.0256	y
230	HiA_sRNA_03710	GAAAATTTAAGATTGGCGAGACAGTAAAAAACTGCGGTGAAATTTCACCGCACTTTTC	y	2	n		y	queF	21	15	10	12	58	37.931	n
231	HiA_sRNA_03714	TCTGATTCTGTGCAATATTTCCTCTAAATAAAAACGCCCTTTCGGGCGTTATTTT	y	2	n		n		13	22	12	8	55	36.3636	n
232	HiA_sRNA_03717	AGGGGCATTAAAAAGGAATTTATGAATAAAATCTCTAAAGTTTAGCTTCATCAAAGGAATCT	n		n		n		26	18	7	11	62	29.0323	n
233	HiA_sRNA_03718	TAGATAAAAAAAGCCCCTAAAT	n		n		n		12	4	4	2	22	27.2727	n
234	HiA_sRNA_03728	GCCATAAAAAACCGCCACGAAATTATCGTGGCGATGTATAAATGCAAAAAGTGCGGTAAGTT	y	1	n		n		24	13	11	14	62	40.3226	n
235	HiA_sRNA_03780	CTCACAAATGGCGTCTGCTTAACGTCCGAAACGTGCTATGCCCTATTGCCTGTGGCTTG	n		n		n		11	17	17	14	59	52.5424	y
236	HiA_sRNA_03786	GGAAAAAGAAAACCGCCACGAAGGCGGTTTAGGTGTCATATAAATTTAGGAGTAAAGAAAGTCT	y	1	n		y	-	26	13	8	17	64	39.0625	y
237	HiA_sRNA_03789	CGATAAAAAAAGACGCATTGAGCGTCTGTCTTTCCACCGCTCCAAGTTATTC	n		n		n		15	14	14	9	52	44.2308	y
238	HiA_sRNA_03792	TTAGGTGTGAGAATCCGCCGCAG	n		n		n		5	5	5	8	23	56.5217	n
239	HiA_sRNA_03824	ACAATTTTAATGTTTAACTCATCAAAGCCTTTCTTCGGAAAGGCTTTATTTTTT	y	2	n		y	ftsH	15	24	9	6	54	27.7778	y
240	HiA_sRNA_03847	TGTTTAAGTTTGACTTAAATGAAAAGACAACTGCATGTTAGGCACACTACGCAGCCTAACTGCTTTTGAAAA	n		n		n		25	21	13	13	72	36.1111	y
241	HiA_sRNA_03849	TGTGAATACTATAGAATTCGTGGGATTTTGCTCGTTTCTCGCGGGCAACAAA	n		n		n		13	17	9	13	52	42.3077	y
242	HiA_sRNA_03850	GTGCAGAGATGAAACGTCTGAATGACCCACTGGAAAATTGGGTTTATCGAATTATTGACGAAATTTAATCAAAGTCGTAGATTAAGGGCGTATCTGATACGCCCTTTGTTAT	y	2	n		y	-	35	34	17	26	112	38.3929	y
243	HiA_sRNA_03892	ATACTAGATAGAAGTGCGGTTGATTTTCACCGCACTTTTTTATTTGCTTTTAACTACGCTGCCCATTTCATTTTATTGCGACGTTTCATTTGATGAATCGTATTGGTTACGGTGCCGACAA	y	2	n		y	-	27	48	23	23	121	38.0165	y
244	HiA_sRNA_03923	TACCACTAAAAACAAGTGCTATCTTAAATAGCCGACATCTATTTTGCTTTCCGAGTAGTGCTCCAATGGGGCACTTTTTTTAT	y	1	y	Aggregatibacter sRNA 20	n		23	29	18	13	83	37.3494	y
245	HiA_sRNA_03939	TGGGTAAAGCCCGTACTGAACTTTAACCCACACAGTAAA	n		n		n		14	8	10	7	39	43.5897	y
246	HiA_sRNA_03943	TTACGGCGGGAGGCTGATAAACTGTCAGCGCGCGGGAGCGTTATAAATATAAAAGTGCGGTTGATTTTTGAG	n		n		y	yccS	19	19	10	24	72	47.2222	y
247	HiA_sRNA_03959	AATCATTCCAACAACAATATTAGATAATCACTCCAACATTCCCGCCTATTTCCCCACAAATAGGCGTTTTTTTTAT	y	1	n		n		25	25	21	5	76	34.2105	n
248	HiA_sRNA_03983	TATAAAAAAAGACCGCACTTTTAAAGTGCGGTCTGAAAATCAAAAGAAATTAAGCAGCGAACGGATCACGTAAAATCATTGTTTCTACACGATCAGGGCCAGTTGAAAGAATATCAATAGGTACGCCAGTTACTT	y	1	n		y	purA	53	32	24	26	135	37.037	y
249	HiA_sRNA_03984	TTAGTATGTCTGTTGTCGTGGGGCTTGCACTTTCAATCTTTTAATCAAATCAACTTTTTATTATCACCGCAGTTTTGTTTCTACAAAGTGCGGTGATTTTT	y	1	n		n		21	45	17	18	101	34.6535	y
250	HiA_sRNA_03995	GTTTTTACCATTAGCGGCGAAGCAGTCTTCGGCGTTAGTATTAGGGATGATTGACAGACTGTCGTAATAATCTTTTAATAAGATAATAAATGCTAAAATTAAAGGCATAGCTATTAGCTATGCCTTTTAT	y	2	n		y	-	41	45	18	26	130	33.8462	y
251	HiA_sRNA_04003	GACTAATGGTCAGTAGGGCTTTTAACCCCTGTCAGCATTCAGGG	n		n		n		10	12	10	12	44	50	y
252	HiA_sRNA_04004	AGAGCAAGGGGCAGTTGCCTACCCCTTGTGTTTAGTCGGTTATGCTTAATATGCTGGGGAGCTTAAAAGCATTAACAACACAAAAATTATGATAT	y	1	n		n		30	27	16	22	95	40	y
253	HiA_sRNA_04008	AACGTTTTCTTTTTGGCTGTATTTTTGTAGAATACCTCGGTCGTTTTAAACGGCCGTTTTTCAT	y	1	n		n		11	30	11	12	64	35.9375	y
254	HiA_sRNA_04018	GGGATGAAAAAAACGCCACTCAATGAGAGCAGCGTTTAACCAAATCGGTTTAATAATATACAGGAAGTAAATGAGTAACAAATTGTTACTCAAGTTCGGTTTCCCGAACTATATGCAAACA	y	1	y	GcvB RNA	n		48	29	21	23	121	36.3636	y
255	HiA_sRNA_04030	GTTAAACAAAGCTGATCGAGATTGAGTTACTGCCTGACCCGCCAGTCAGGC	n		n		n		14	11	13	13	51	50.9804	y
256	HiA_sRNA_04031	TTAGGTTGCTACCAAGCTGGGGAGCTAAAGGACAGCAACAAGAACCCGATAATAATCATT	n		n		n		22	12	12	14	60	43.3333	y
257	HiA_sRNA_04032	ACTAGAGCCGACTAAATCAGTCGG	n		n		n		8	4	6	6	24	50	n
258	HiA_sRNA_04041	AAGTGCACTTTTGAACGTTCCTTTGGCGTAAACAAAGGAATTGAATTTGTCAAAAGGTAATAAAGTAGGGCAAATTCAAAACCCTAGTTAAGTGACTGTTTAGAATGTAACTTTAATTAAAAGTTCAGTATAAACAA	n		n		n		54	41	17	25	137	30.6569	y
259	HiA_sRNA_04048	TTATAGAAAAAGTTCCCCTCTTTAAAAGAGTTAAAAGAGGGGAATTGGTTAGAAGAT	n		n		n		23	16	5	13	57	31.5789	y
260	HiA_sRNA_04052	CACACATCTGTTAAGCGATTGCAGGTTGCTCCAACAGGTAGAGTAGAAAGTAAATTCGTTAGGGTTCAAAAAGGCTGAAGGTTTAAACTTCAGTCTTTTTT	y	1	y	Haemophilus regulatory RNA responsive to iron	n		31	31	16	23	101	38.6139	y
261	HiA_sRNA_04058	TAATGTTTTTATGACCTCACTTTTTATATT	y	1	n		y	rapZ	7	17	4	2	30	20	n
262	HiA_sRNA_04059	CCTAGTGAGATTGTAAAGCCTGTGAGTGTATAAA	n		n		y	pheA	11	10	4	9	34	38.2353	n
263	HiA_sRNA_04060	ATTGTTTTATTGTTGAAAAAGCT	n		n		n		7	11	1	4	23	21.7391	n
264	HiA_sRNA_04085	ATAACCGCACTTCAATCTGCTCTTGAATTAG	n		n		n		9	10	8	4	31	38.7097	y
265	HiA_sRNA_04098	ATTAAATAAAATCCCCTATGCCGATAAGCTATAGGGGATTTACTACATTAATAA	y	2	n		y	xylB	22	16	9	7	54	29.6296	y
266	HiA_sRNA_04106	TATTTTGCCTTCAGCTTCTGAACGCTACTTAAGCACAGCACTGTTTGAAGGGATTGAGGGATAAACAAAAAAGAATAAAGTGCGGTGAATTTTTACCGCA	y	2	n		y	cysK	33	28	17	22	100	39	y
267	HiA_sRNA_04116	ATGTATTTAGCGTGAAAATAGACAGGTACAAAGCCTGTCTAAATGAATATA	y	1	n		n		21	14	6	10	51	31.3725	n
268	HiA_sRNA_04145	CGGTAAAAAAATCCCCGTTAAATTTATCATTTAACGG	n		n		n		14	11	7	5	37	32.4324	n
269	HiA_sRNA_04157	TTAAGTTGATTAAGAGAAAGGGAGCATTTTTT	n		n		n		11	12	1	8	32	28.125	n
270	HiA_sRNA_04160	GCCACACCAGTTGGTTATTAAT	n		n		n		6	7	5	4	22	40.9091	n
271	HiA_sRNA_04193	GGAACGTCAAGCTCTACCCCAAAGGGTAGCACTGGGATAAACCTAGGGTATACCTACCCTAG	n		n		n		19	11	17	15	62	51.6129	y
272	HiA_sRNA_04194	CAATCAACCGTGGGTAAGTATAC	n		n		n		8	5	5	5	23	43.4783	n
273	HiA_sRNA_04195	TGTGTACCTACCCTAGGCAATCAACCGTGGGTAAGTATACCCACGGTTAATTATAGTAATAATAGTTCCCCTCTGGGGAACGTCAAGCTCTACCCCAAAGGGGTAGC	y	5	n		n		30	26	27	24	107	47.6636	y
274	HiA_sRNA_04196	CAGGCAAAAAGAAAGGCACGGAATGTGCCTTTTCTTTATTTTACTGCCGTGGGTATAC	y	2	n		n		16	17	11	14	58	43.1034	y
275	HiB_sRNA_00017	AACCTTTAAAGCCACTATATCAGGAGACCAATCCTGTCTTCCTACAATATCCGTA	n		n		n		18	15	16	6	55	40	y
276	HiB_sRNA_00023	AATTTACTGTAAAATCTCACCGCACTTTGTATAAAAGTGCGGTGTTTTTATATC	y	1	n		n		16	21	9	8	54	31.4815	y
277	HiB_sRNA_00024	AAAAAAATCTGCACCCTAATCAGTTAAACCTTAGCCTAACTTTTGGGTGCAGATTCATTACTACTATTATTT	y	2	n		n		24	25	15	8	72	31.9444	y
278	HiB_sRNA_00046	AAAAAATAAGCGGCGATATTAATCGCCGCTAAACATATAATCAACGAAAGAAAATAA	y	1	n		n		30	10	9	8	57	29.8246	n
279	HiB_sRNA_00072	ATAAATTTACACTCAACCCTTTATCTTCATTAAGAGACAATATTA	n		n		n		18	16	9	2	45	24.4444	y
280	HiB_sRNA_00077	AAAACAAAAGGCAGACTTCCGCCTGCCTTATTTAACGTATCTTATTCGCCGGAATAATCTTCACCGCCAGAGGCAGCTTCACTCACATCACTAGATAAGGTGT	y	2	n		y	-	31	26	28	18	103	44.6602	y
281	HiB_sRNA_00088	CTTTAAAAAGGGGAAGATCCACTTCCCCTTAGACTACAACAAAAATTGA	y	1	n		n		20	11	11	7	49	36.7347	n
282	HiB_sRNA_00155	ACATATCGTCATGCCCGTTCAATAAATGATT	n		n		n		10	10	7	4	31	35.4839	y
283	HiB_sRNA_00204	TCTACAACTATCAGCCAATCTGTGT	n		n		n		7	8	7	3	25	40	y
284	HiB_sRNA_00210	GCAAAAAATAACGACGCACTTGGAAACTTAAAAAACTTCACAACAGTGCGTCGTTGTGTGCGGTGCATTA	y	10	n		n		25	16	14	15	70	41.4286	y
285	HiB_sRNA_00247	CAAAAAATAACGACGCACTTGGAAACTTAAAAAACTTCACAACAGTGCGTCGTTGTGTGCGGTGCATTA	y	10	n		n		25	16	14	14	69	40.5797	y
286	HiB_sRNA_00255	GATCGCTTTTATTAAAAAGAGCGACCGCACTTTTATTCAATCAT	y	1	n		n		14	15	9	6	44	34.0909	n
287	HiB_sRNA_00265	ACTAAAAAGGCTAAGCCAGTAAAAAACTGAGCTTAGCCCCCAAACTAAATTTT	n		n		n		23	11	12	7	53	35.8491	n
288	HiB_sRNA_00278	TGTTGGTGGGCTGAAGCCCAGCCTACA	n		n		n		5	6	7	9	27	59.2593	y
289	HiB_sRNA_00281	AACTCACTGAAGCTATAACGCCGACCAAGCACCCTCGATCCACTTGGCTC	n		n		n		14	9	19	8	50	54	y
290	HiB_sRNA_00292	ACTCCCCTACGGTCTTGGATGGGGCTTGAATAGGTC	n		n		n		6	10	9	11	36	55.5556	y
291	HiB_sRNA_00303	CTATCAGTGACCAACGTTCCCTATCGTCGGGG	n		n		n		6	8	10	8	32	56.25	y
292	HiB_sRNA_00305	TCAATCTAAACAAGAAATCCTCGTATTTTATTTTT	n		n		n		12	15	6	2	35	22.8571	y
293	HiB_sRNA_00308	TGTTTCCTATAATGCGAACCGTTGATTGTTGATTAGTAGTTGTAGGGTGGGCTTTAGCCCACCAACAAA	n		n		n		17	23	12	17	69	42.029	n
294	HiB_sRNA_00338	TTTTGAGTTAGGCATTGACTAAGATTCGCACGTTTTTACGTGCGAATTTTTATTTTCTTAA	y	1	n		y	coaA	14	28	8	11	61	31.1475	y
295	HiB_sRNA_00354	ATGTAGGGTGGGCTTTAGCCCACCGATCTTACTA	n		n		n		7	10	8	9	34	50	y
296	HiB_sRNA_00355	TTTAACTTGCACTTGTCACCCTTGAACATTGGTTGCCTG	n		n		n		7	15	10	7	39	43.5897	y
297	HiB_sRNA_00363	GATTGGTGGCTGATCTACGTCAAAGG	n		n		n		6	7	4	9	26	50	y
298	HiB_sRNA_00375	TTTAGTCCTTAAACAAATGTATCTGA	n		n		n		9	10	4	3	26	26.9231	n
299	HiB_sRNA_00380	CTTCGGGCATCTTCCCCCACAAGTAA	n		n		n		6	6	10	4	26	53.8462	n
300	HiB_sRNA_00384	ATGAGCCGTTCGCGACTCATATTTTTGTGTGGTGCA	n		n		n		6	13	7	10	36	47.2222	y
301	HiB_sRNA_00388	GCACTTTTTGAAAGTGCGGTTTTTTTGTTTC	n		n		n		4	16	4	7	31	35.4839	n
302	HiB_sRNA_00409	AAATTGGTTCCTTAGGTTATTTGCCCCACATTTATTGTGGGGTTTTTTCTTGC	y	1	n		n		8	25	9	11	53	37.7358	y
303	HiB_sRNA_00413	AGTATAATATAGATGAAGTGAACTTCATTTAGTTTAAGGGCTAAGTTCTAT	n		n		n		18	19	4	10	51	27.451	y
304	HiB_sRNA_00421	AATAAAAGGGCTTGTTTTCACAAGCCCTAAAACATTCAATTAATTGACCGCTCTTTCTGATTTACTCGTCACTTT	y	1	n		y	lon	22	27	17	9	75	34.6667	y
305	HiB_sRNA_00435	TATAACGAAGGCGAGCCAATTGACTCGCCCGATTTCACACTAAAGTGCG	y	1	n		n		15	10	13	11	49	48.9796	y
306	HiB_sRNA_00442	AAGAATTTGACCGCTTAAATAGAAAACTAA	n		n		n		15	7	4	4	30	26.6667	y
307	HiB_sRNA_00451	ATTTGACCGCACTTTTATTGGGTTAGAATAGTGGACGTTTTAAA	n		n		n		12	17	5	10	44	34.0909	n
308	HiB_sRNA_00469	ATACACGGAAGCCCAATCTAAAATGATCGGGCCCCGGAATCAGCAGCAAACATAACATTTCAGTTACATCTGCCT	n		n		n		26	15	21	13	75	45.3333	y
309	HiB_sRNA_00473	AACTAAAACCCCGAAAGCAGCGAACTCTCGGGGTTTTTC	y	2	n		n		12	8	11	8	39	48.7179	y
310	HiB_sRNA_00476	TGCCGAGAGGGCGGAGAATAAAATACCCGAAAGGGGAATAATCCCGGCCGTTCTTTGTTTCGGTTTACGAACCTCTTGGCGACCCTATT	n		y	sRNA-Xcc1	n		22	22	21	24	89	50.5618	y
311	HiB_sRNA_00478	ACGAAAAATCCGACCGCACTTTTCCCAAAGAAATCCGTGCGGCGGATTGCTACACCCAAAATTCACAA	n		n		n		24	12	21	11	68	47.0588	y
312	HiB_sRNA_00500	AGAGGAGGTAGAAAATCGCAATAAAT	n		n		n		13	4	2	7	26	34.6154	y
313	HiB_sRNA_00510	ACGGAGGAATGGTCGAGTGGTTGAAGGCACCGGTCTTGAAAACCGGCGAGGGTTTACGCCCTCCTAGGGTTCGAATCCCTATTCCTCCGCCATCA	n		y	tRNA	y	-	20	21	26	28	95	56.8421	y
314	HiB_sRNA_00542	TCTTGTAGTGGATAAGCGTGAAT	n		n		n		6	8	2	7	23	39.1304	n
315	HiB_sRNA_00543	AAGTTTACATCGCCTTGCACGATAGGTTAAATCAA	n		n		n		12	10	7	6	35	37.1429	y
316	HiB_sRNA_00555	AACTCAGGATCTACGAAATAGCCCGACAGCGGCAACTGGCGGACTATC	n		n		n		15	7	14	12	48	54.1667	y
317	HiB_sRNA_00574	GACGAGAGACAGCGAGTGCTCACACAGATTG	n		n		n		10	4	7	10	31	54.8387	n
318	HiB_sRNA_00594	CATTGGGGACAACTCCTACATCGTCCCCTTGCGATTATCTTAGATAACTGTTCCGGAACAGCTAACTAAACAACAGATAATCAAGAAA	n		n		n		31	21	22	14	88	40.9091	y
319	HiB_sRNA_00615	TCGGTTAAGGCGAAGCACATTGGTCA	n		n		n		7	6	5	8	26	50	n
320	HiB_sRNA_00621	CATATCTACAGTGAGGAAGATTGAACAATCTTCCTCTTTTTCTATCACGCTATTTCATTCT	y	1	n		n		16	24	14	7	61	34.4262	n
321	HiB_sRNA_00627	TTTTTTAACTTGATTTTAAGCAAAAAAAGCGAATCTTTCGATTCGCCTTGCTTTTAATAA	y	2	n		n		19	25	9	7	60	26.6667	y
322	HiB_sRNA_00633	TAGTAAGCGGTCTGGCTCACTAATAATAGTAGTACGACAAGGATA	n		n		n		16	11	7	11	45	40	y
323	HiB_sRNA_00634	CCTCTTCAAACGTTGCGAAAAAGCGCAACACTCGCTTTCAAG	n		n		n		13	9	13	7	42	47.619	y
324	HiB_sRNA_00635	ATTATAACGTTAAGTTGTAGATAAATAAACAGTATT	n		n		n		16	13	2	5	36	19.4444	y
325	HiB_sRNA_00640	GGATTTATATATTGCTGTCAAACGAAAAAAAT	n		n		n		14	10	3	5	32	25	y
326	HiB_sRNA_00654	GACGAGAGACAGCGAGTGCTCACACAGATT	n		n		n		10	4	7	9	30	53.3333	n
327	HiB_sRNA_00673	AAAAAAATGGCTAGTGCGAAAGGAGTGGGGGAATGCACTAGCCAAGTTTCATTACTATTAAATTA	y	1	n		n		25	16	8	16	65	36.9231	n
328	HiB_sRNA_00675	AGTTGTTAGGTTAATTCATTTGAGATGAAGTAGTATAAGGGTTAAAATCCTCAGTCTGATTAGATTGAGGATTTTTCTTTTTT	y	1	n		y	htpG	23	36	6	18	83	28.9157	y
329	HiB_sRNA_00676	AGTTCACGCACGCAAGCGGTTAATTTTGTTAGAGAATTGTAAACGCGTGCGTGAATTTTTTCAAATA	n		n		n		20	22	10	15	67	37.3134	y
330	HiB_sRNA_00688	GGTCAAGTTGTAGCAACTCAAGTTGGTGCATTAGCAAAAACTCAATTGGCTAACTTCATTAACCAACATATTTAATCGTTGTTTAAAGCTATAAGTAACTTTAGCGCATTGATAAGATTGCCCCTTAATGGGGCAATTTTTTTGTCT	y	1	n		y	trxA	45	51	25	26	147	34.6939	y
331	HiB_sRNA_00690	ATCCCCTGATTATCGCTAATCAGGGGATTCATCGCTCAATGGCGTTTAAAAACTCATCTTTCGATGATGATCGCTCTAAGGCGTTACGCTCG	y	2	n		n		22	28	23	19	92	45.6522	n
332	HiB_sRNA_00700	CTCGTTGTTACCAGCTACGCAGAACGAGCCTGCATATAGCCATACGCCGCCTACCTTGCGC	n		n		n		13	13	22	13	61	57.377	y
333	HiB_sRNA_00712	AATGTGGGCTGATTCTACCGCACTTTTGAGGTTCATAAAA	n		n		n		11	13	7	9	40	40	n
334	HiB_sRNA_00720	TTTTCAAGTGATGAATAATGATTGAATTTTGACTTTATGACCCCACTATTTAGTGGGGTTATTTTTTGGAA	y	1	n		y	-	19	31	7	14	71	29.5775	y
335	HiB_sRNA_00727	GTGAAAAATAACCGCACTTTTTAGATAAGG	y	2	n		n		12	8	4	6	30	33.3333	n
336	HiB_sRNA_00771	AGTGTGAGATTCCTCAAAGAGGAACGACTATAACTAGCCGTGGGTATACTTACCCACGGTTACGCTAGTT	n		n		n		20	18	15	17	70	45.7143	y
337	HiB_sRNA_00804	TTAAAGTGCGGTCATAAAACACAATGTTTTTTGACCGCAGTTTTCATCAATTACGCATAAAGCGGATTGATACGATCTACATTCAAACCGAATTTCGCAA	y	1	n		y	aceE	34	30	20	16	100	36	y
338	HiB_sRNA_00814	TTTGGTTTAGAGTTTGTTTGTCTCCTTTTACAAATTCTAAATTAG	n		n		n		10	23	5	7	45	26.6667	n
339	HiB_sRNA_00822	TAAAAAGAAGCCCGATCATTGTGATCGGACTTTTTTCTTAAATATA	y	2	n		y	mfd	16	16	7	7	46	30.4348	y
340	HiB_sRNA_00853	AAAAATAACGCCCGAAAGGGCGTTTTTATTTAGAGGAAATATTGCACAGAATCAGAT	y	2	n		y	-	23	14	8	12	57	35.0877	y
341	HiB_sRNA_00855	TTTGATGAAGCTAAACTTTAGAGATTTTATTCATAAATTCCTTTTTAATGCCCCTAATTATTTAGGGGCTTTTTTTATCTAAT	y	2	n		n		23	39	11	10	83	25.3012	y
342	HiB_sRNA_00857	AAACTCTTACTTTTGAGGTAA	n		n		n		7	8	3	3	21	28.5714	n
343	HiB_sRNA_00879	ATGCGGTCAAAATAGACCGCACTTTTCAGGCAATAAATAAACATTGCTT	y	2	n		y	-	18	13	10	8	49	36.7347	n
344	HiB_sRNA_00885	TGAATAACTTGGAGCGGTGGAAAGACAGACGCTCAATGCGTCTTTTTTTA	n		n		n		14	15	8	13	50	42	n
345	HiB_sRNA_00886	ATGATGAACTGTTTAGGAGGATCGAAAGATCCGCCGTTTT	n		n		n		11	12	6	11	40	42.5	y
346	HiB_sRNA_00890	TTAATACGAACTAAAAGGACTAAGCTTAGTCCTTTACTGACTTTCTAAC	y	2	n		n		17	16	10	6	49	32.6531	n
347	HiB_sRNA_00898	AAAGCGGCTAAAAAATAAGCCGCTTTTCATCATTATTTCCCTGCAAAAACTTT	y	3	n		y	-	19	16	12	6	53	33.9623	y
348	HiB_sRNA_00925	ACTTGTCGGAGCAGTCACTCTTAGAAATTA	n		n		n		9	9	6	6	30	40	y
349	HiB_sRNA_00952	ATCAACCGCACTTCTATCTAGTATCTAGATTATATTTCAATTAATTACTCGTCGCTTTACGTCTAGCAATAACTGCATCAGAAAGTTGTTGCAATAATCTTTCAGAATCTTCCCATCCAATGCACGCATCCG	n		n		y	aroG	39	44	33	16	132	37.1212	y
350	HiB_sRNA_00957	TATTAAAAAAGCGGTGATAATCTCCCTGCCGCAGCCTACTTGAGGTGGCTCGTCCTGCTCAGGTGTCCGAGAGCGTG	n		n		n		16	19	20	22	77	54.5455	y
351	HiB_sRNA_00971	AGGTAGATTTCATCCTGCAATGAAGTCATTTTATTTTCGTATTATTTACTGTGTGGGTTAAAGTTCAGTACGGGCTTTACCCATCTTGTAAAAAATT	n		n		n		26	39	14	18	97	32.9897	y
352	HiB_sRNA_00972	TTACAGTCTATACGCAACCCTGTTTTTACCCCTGT	n		n		n		7	13	11	4	35	42.8571	y
353	HiB_sRNA_00974	GGTTTCTTAAAGTAAAAGTGCGGTAAATTTTCAA	n		n		n		12	12	3	7	34	29.4118	n
354	HiB_sRNA_00986	TAAAAAAAACGCCTATTTGTGGGGAAATAGGCGGGAATGTTGGAGTGATTATCTAATATTGTTGTTGGAATGATT	y	1	n		n		24	25	5	21	75	34.6667	n
355	HiB_sRNA_01013	CCCTGAATGCTGACAGGGGTTAAAAGCCCTACTGACCATTAGT	n		n		n		12	10	11	10	43	48.8372	y
356	HiB_sRNA_01014	ATGCTTTTAAGCTCCCCAGCATATTAAGCATAACCGACTAAACACAAGGGGTA	n		n		n		19	12	13	9	53	41.5094	n
357	HiB_sRNA_01017	GAAAAACGGCCGTTTAAAACGACCGAGGTATTCTACAAAAATACAGCCAAAAAGAAAACGTT	y	1	n		n		29	10	12	11	62	37.0968	y
358	HiB_sRNA_01019	TGTTTGCATATAGTTCGGGAAACCGAACTTGAGTAACAATTTGTTACTCATTTACTTCCTGTATATTATTAAACCGATTTGGTTAAACGCTGCTCTCATTGAGTGG	y	1	y	GcvB RNA	n		28	40	18	20	106	35.8491	y
359	HiB_sRNA_01024	GTTATTGCCTGACTGGCGGGTCAGGCAGTAACTCAATCTCGATCAGCTTTGTTTAACAACTCT	n		n		n		14	20	15	14	63	46.0317	y
360	HiB_sRNA_01025	AATGATTATTATCGGGTTCTTGTTGCTGTCCTTTAGCTCCCCAGCTTGGTAGCAACCTAAAC	n		n		n		13	22	15	12	62	43.5484	y
361	HiB_sRNA_01032	GAACTTTTAATTAAAGTTACATTCTAAACAGTCACTTAACTAGGGTTTTGAATTTGCCCTACTTTATTACCTTTTGACAAATTCAATTCCTTTGTTTACGCCAAAGGAACGTTCAAAAGTGCA	n		n		n		39	45	23	16	123	31.7073	y
362	HiB_sRNA_01037	AAATAAAAAAGACTGAAGTTTAAACCTTCAGCCTTTTTGAACCCTAACGAATTTACTTTCTACTCTACCTGTTGGAGCAACCTGCAATCGCTTAACAGATG	y	1	y	Haemophilus regulatory RNA responsive to iron	n		34	30	23	14	101	36.6337	y
363	HiB_sRNA_01043	AATAAAAAAGCTATACTTCCCACCAGAAATATAGCTTTTTCAACAATAAAACAATTAAATAAGCACTTGCACTGGAGCTACATACCCTTGTGGCACTTGCTCTTTATCTTCAAAGGTTACAAATTCCCACGCTTCTTGATTTGCT	y	1	n		y	lpxC	49	45	34	17	145	35.1724	y
364	HiB_sRNA_01063	TATTAATGTAGTAAATCCCCTATAGCTTATCGGCATAGGGGATTTTATTTAA	y	2	n		y	xylB	16	20	7	9	52	30.7692	n
365	HiB_sRNA_01067	TTAATAAAAGTGCGGTAAAAATTCACCGCACTTTATTCTTTTTTGTTTATCCCTCAATCCCTTCAAACAGTGCTGTGCTTAAGTAGCGTT	y	4	n		1y, 2n	cysK	24	34	19	13	90	35.5556	y
366	HiB_sRNA_01098	ACAAAACAAGGGAGCATTAAAAAATGCTCCCTTTCTCTTAATCAACTTAACTTTATGGAATGACGAGTAATTAACCT	y	2	n		y	-	30	22	15	10	77	32.4675	y
367	HiB_sRNA_01103	ATAGAAAATACTATTCTTACCAACTAAATCTTCAATATTT	n		n		n		17	15	7	1	40	20	y
368	HiB_sRNA_01114	TATACCCACGGCAGTAAAATAAAGAAAAGGCACATTCCGTGCCTTTCTTTTTGCC	y	2	n		n		17	15	14	9	55	41.8182	n
369	HiB_sRNA_01139	TCGAGCTTACGGTTCGGATTGTTTAAAGCTGGTTAAACCTAGCTTGCTACCTCGTCAGGTCGCGCT	n		n		n		12	21	16	17	66	50	y
370	HiB_sRNA_01145	GATATAAAAACACCGCACTTTTATACAAAGTGCGGTGAGATTTTAC	y	1	n		n		17	13	8	8	46	34.7826	y
371	HiB_sRNA_01146	AAATAATAGTAGTAATGAATCTGCACCCAAAAGTTAGGCTAAGGTTTAACTGATTAGGGTGCAGATTTTTTT	y	2	n		n		25	24	8	15	72	31.9444	n
372	HiB_sRNA_01164	GTAGTTTAGTTGTAGTTTCATAATTTTATCCTTATTTTTGCCCACATTTATGTGGGCTTTTTTATG	y	1	n		y	-	12	35	8	11	66	28.7879	y
373	HiB_sRNA_01205	TCAATTTTTGTTGTAGTCTAAGGGGAAGTGGATCTTCCCCTTTTTAAA	y	1	n		n		11	20	7	10	48	35.4167	y
374	HiB_sRNA_01206	ACCCCAAAATAAAACCGCACTTCACGACGCTATTTGAGAAGTGCGGTTAAAATTTAAGTTATTTCAGATTATTC	y	2	n		n		26	22	15	11	74	35.1351	n
375	HiB_sRNA_01303	TCTGTGTGGGCACTTGTTGATTGACT	n		n		n		3	11	4	8	26	46.1538	n
376	HiB_sRNA_01304	TAATGCACCGCACACAACGACGCACTGTTGTGAAGTTTTTTAAGTTTCCAAGTGCGTCGTTATTTTTTG	y	10	n		n		16	25	14	14	69	40.5797	y
377	HiB_sRNA_01352	CTATAGTCTACCGAGAAGTTCGTTAGGATCCAATATTTTCA	n		n		n		12	14	8	7	41	36.5854	y
378	HiB_sRNA_01370	TCACTAATAAAAATGCGATGAAATTCTTTTCAAATTGCACCGCACTTTTAAGAATATA	n		n		n		23	19	10	6	58	27.5862	y
379	HiB_sRNA_01372	GAGCCAAGTGGATCGAGGGTGCTTGGTCGGCGTTATAGCTTCAGTGAGTT	n		n		n		9	14	8	19	50	54	y
380	HiB_sRNA_01387	GCCGTCTATTTCTGTATAGAAGTAGATTTTTTGAACAACATTCTATTATTGAATAACATTTA	n		n		n		20	26	8	8	62	25.8065	y
381	HiB_sRNA_01388	GCCCCGACGATAGGGAACGTTGGTCACTGATAG	n		n		n		8	6	8	11	33	57.5758	n
382	HiB_sRNA_01390	TTTGTTGGTGGGCTAAAGCCCACCCTACAACTACTAATCAACAATCAACGGTTCGCATTATAGGAAACA	n		n		n		23	17	17	12	69	42.029	y
383	HiB_sRNA_01430	TAAGAAAATAAAAATTCGCACGTAAAAACGTGCGAATCTTAGTCAATGCCTAACTCAAAAT	y	1	n		y	coaA	28	14	11	8	61	31.1475	y
384	HiB_sRNA_01444	TAGTAAGATCGGTGGGCTAAAGCCCACCCTAC	n		n		n		9	6	9	8	32	53.125	n
385	HiB_sRNA_01454	CCTTTGACGTAGATCAGCCACCAATC	n		n		n		7	6	9	4	26	50	y
386	HiB_sRNA_01462	ATCAGATACATTTGTTTAAGGACTAAA	n		n		n		11	9	3	4	27	25.9259	n
387	HiB_sRNA_01467	TTGTGGGGGAAGATGCCCGAAGGACGGAAGGGGGCTTTCTATATCTCCCCTCAACCTTC	n		n		n		12	14	15	18	59	55.9322	y
388	HiB_sRNA_01474	GAAACAAAAAAACCGCACTTTCAAAAAGTG	n		n		n		16	4	6	4	30	33.3333	n
389	HiB_sRNA_01500	ATAGAACTTAGCCCTTAAACTAAATGAAGTTCACTTCATCTATATTATACT	n		n		n		19	18	10	4	51	27.451	y
390	HiB_sRNA_01507	CCTAAAGCACCACGCCGTAAAGTGACGAGTAAATCAGAAAGAGCGGTCAATTAATTGAATGTTTTAGGGCT	n		n		y	lon	25	16	13	17	71	42.2535	y
391	HiB_sRNA_01520	TAGATTACAGAGCTTAGTCCTTGAT	n		n		n		7	9	4	5	25	36	n
392	HiB_sRNA_01523	CGCACTTTAGTGTGAAATCGGGCGAGTCAATTGGCTCGCCTTCGT	y	1	n		n		8	13	11	13	45	53.3333	y
393	HiB_sRNA_01548	TTTAAAACGTCCACTATTCTAACCCAATAAAAGTGCGGTCAAAT	n		n		n		17	12	10	5	44	34.0909	y
394	HiB_sRNA_01575	GAAAAACCCCGAGAGTTCGCTGCTTTCGGGGTTTTAGTT	y	2	n		n		8	12	8	11	39	48.7179	n
395	HiB_sRNA_01579	AATAGGGTCGCCAAGAGGTTCGTAAACCGAAACAAAGAACGGCCGGGATTATTCCCCTTTCGGGTATTTTATTCTCCGCCCTCTCGGCA	n		y	sRNA-Xcc1	n		22	22	24	21	89	50.5618	y
396	HiB_sRNA_01582	TTGTGAATTTTGGGTGTAGCAATCCGCCGCACGGATTTCTTTGGGAAAAGTGCGGTCGGATTTTTCGT	n		n		n		12	24	11	21	68	47.0588	y
397	HiB_sRNA_01593	CACCGCTAAAAATGCGGTCAAAATTGACCGCACTTTTTCACATGATT	y	2	n		y	iscU	15	13	12	7	47	40.4255	n
398	HiB_sRNA_01612	ATTTATTGCGATTTTCTACCTCCTCTTTGAGAA	n		n		n		7	15	7	4	33	33.3333	n
399	HiB_sRNA_01654	AGGATTCTTTTGAAAACTAAATACTGTAGATAAAATCTAATCTGGCAGTCTTATTGTAAAATAATATGTCTGTCAGATTAATTTT	n		n		y	raiA	31	33	9	12	85	24.7059	y
400	HiB_sRNA_01656	TCAACCAAAAGTAGAAGATGCGCTAAAAATCGCAGGATTGTTATAAAAATAAAGGGG	n		n		y	dapA	26	11	7	13	57	35.0877	y
401	HiB_sRNA_01672	GGATCTACTAAGATAGTCCGCCAGTTGCCGCTGTCGGGCTATTTCGTAGATCCTGAGTT	n		n		n		11	18	14	16	59	50.8475	y
402	HiB_sRNA_01681	TTATTTATCAGCCCTGTGCCGTAAAACTCCGTCCTTCAGGGCGGAGATATAAG	y	1	n		n		13	15	13	12	53	47.1698	y
403	HiB_sRNA_01691	AATCTGTGTGAGCACTCGCTGTCTCT	n		n		n		4	9	7	6	26	50	n
404	HiB_sRNA_01719	TGTTTAGTTAGCTGTTCCGGAACAGTTATCTAAGATAATCGCAAGGGGACGATGTAGGAGTTGTCCCCAATG	n		n		n		19	21	12	20	72	44.4444	y
405	HiB_sRNA_01744	CTAGTATGTAGAATGAAATAGCGTGATAGAAAAAGAGGAAGATTGTTCAATCTTCCTCACTGTAGATATG	y	1	n		n		26	20	8	16	70	34.2857	n
406	HiB_sRNA_01758	TTATTAAAAGCAAGGCGAATCGAAAGATTCGCTTTTTTTGCTTAAAATCAAGTTAAAAAA	y	2	n		n		25	19	7	9	60	26.6667	y
407	HiB_sRNA_01763	TTATCCTTGTCGTACTACTATTATTAGTGAGCCAGACCGCTTACT	n		n		n		10	17	11	7	45	40	y
408	HiB_sRNA_01764	CTTGAAAGCGAGTGTTGCGCTTTTTCGCAACGTTTGAAGAG	n		n		n		9	13	7	12	41	46.3415	y
409	HiB_sRNA_01765	CTAAATACTGTTTATTTATCTACAACTTAA	n		n		n		11	13	5	1	30	20	n
410	HiB_sRNA_01770	ATTTTTTTCGTTTGACAGCAATATATAAATCC	n		n		n		10	14	5	3	32	25	n
411	HiB_sRNA_01811	CAAATAACAGGTAAAAAGTGCGGTGAAAAATGACCGCACTTTTTGTTGATTAACGAACAAAAGGA	y	2	n		n		28	14	9	14	65	35.3846	y
412	HiB_sRNA_01820	AAAAAAGAAAAATCCTCAATCTAATCAGACTGAGGATTTTAACCCTTATACTACTTCATCTCAAATGAATTAACCTAACAACT	y	1	n		y	htpG	36	23	18	6	83	28.9157	n
413	HiB_sRNA_01822	TATTTGAAAAAATTCACGCACGCGTTTACAATTCTCTAACAAAATTAACCGCT	n		n		n		20	16	12	5	53	32.0755	n
414	HiB_sRNA_01832	AAGACAAAAAAATTGCCCCATTAAGGGGCAATCTTATCAATGCGCTAAAGTTACTTATAGCTTTAAACAACGATTAAATATGTTGGTTAATGAAGTTAGCCAATTGAGTTTTTGCTAATGCACCAACTTGAGTTGCTACAACTTGAC	y	1	n		y	trxA	52	45	25	25	147	34.0136	y
415	HiB_sRNA_01833	AGACTTCCGAGCGTAACGCCTTAGAGCGATCATCATCGAAAGATGAGTTTTTAAACGCCATTGAG	n		n		n		20	16	14	15	65	44.6154	y
416	HiB_sRNA_01843	TGCGCAAGGTAGGCGGCGTATGGCTATATGCAGGCTCGTTCTGCGTAGCTGGTAACAACGAG	n		n		n		13	14	13	22	62	56.4516	y
417	HiB_sRNA_01861	TCACGGAGGAATGGTCGAGTGGTTGAAGGCACCGGTCTTGAAAACCGGCGAGGGTTTACGCCCTCCTAGGGTTCGAATCCCTATTCCTCCG	n		y	tRNA	y	-	18	21	24	28	91	57.1429	y
418	HiB_sRNA_01865	TTCCAAAAAATAACCCCACTAAATAGTGGGGTCATAAAGTCAAAATTCAATCATTATTCATCACTTGAAAA	y	1	n		y	-	31	19	14	7	71	29.5775	y
419	HiB_sRNA_01875	CCTTATCTAAAAAGTGCGGTTATTTTTCACCGCACTTTACTAAT	y	6	n		1y, 1n	zevB	12	17	10	5	44	34.0909	n
420	HiB_sRNA_01881	TTAAGCCCTGTAGATTACAGGACTT	n		n		n		7	8	5	5	25	40	n
421	HiB_sRNA_01946	GCAACAAAAAACGCACAAGCTCACCTACAACCTTCTGGGGTAGATTAACATTCAGTTTCTAACCCTGAAATTTAATCAACTGGTAAGCGTTCCGCCTACCA	n		n		y	hmw1B, hmw1B	34	24	28	15	101	42.5743	y
422	HiB_sRNA_01956	TGTCTTCCCCAACTTATGGGGAAGA	n		n		n		6	7	6	6	25	48	y
423	HiB_sRNA_01969	TAGGGTGGGCTTCAGCCCACCGTTTTTATTCTATTTTTTATGGTTAATTGGTGGGCTAAAGCCCACCCTACAACTATAA	y	1	n		n		18	28	17	16	79	41.7722	n
424	HiB_sRNA_01970	TTTTAAAATTCGGGGTAGGGCTTTTAGACCTATTTATTACGA	n		n		n		11	17	5	9	42	33.3333	n
425	HiB_sRNA_02021	AAAAAGCCCCTAAATAATTAGGGGCATTAAAAAGGAATTTATGAATAAAATCTCTAAAGTTTAGCTTCATCAAAGGAATCT	y	2	n		n		36	22	11	12	81	28.3951	n
426	HiB_sRNA_02044	TTTATTTATTGCCTGAAAAGTGCGGTCTATTTTGACCGCA	y	2	n		y	-	9	16	7	8	40	37.5	n
427	HiB_sRNA_02052	GATAAAAAAAGACGCATTGAGCGTCTGTCTTTCCACCGCTCCAAGTTATTCA	n		n		n		16	14	13	9	52	42.3077	y
428	HiB_sRNA_02058	TTAGAAAGTCAGTAAAGGACTAAGCTTA	n		n		n		12	7	3	6	28	32.1429	n
429	HiB_sRNA_02066	AAAGTTTTTGCAGGGAAATAATGATGAAAAGCGGCTTATTTTTTAGCCGCTTT	y	3	n		y	-	16	19	6	12	53	33.9623	y
430	HiB_sRNA_02073	ACAATTTTAATGTTTAACTCATCAAAGCCTTTCTTCGGAAAGGCTTTATTTTT	y	2	n		y	ftsH	15	23	9	6	53	28.3019	y
431	HiB_sRNA_02092	TAATTTCTAAGAGTGACTGCTCCGACAAGT	n		n		n		9	9	6	6	30	40	y
432	HiB_sRNA_02119	GGACACCTGAGCAGGACGAGCCACCTCAAGTAGGCTGCGGCAGGGAGATTATCACCGCTTTTTTAATA	n		n		n		18	14	17	19	68	52.9412	y
433	HiB_sRNA_02134	TTGAAAATTTACCGCACTTTTACTTTAAGAAACC	n		n		n		12	12	7	3	34	29.4118	n
434	HiB_sRNA_02142	AATCATTCCAACAACAATATTAGATAATCACTCCAACATTCCCGCCTATTTCCCCACAAATAGGCGTTTTTTTTA	y	1	n		n		25	24	21	5	75	34.6667	y
435	HiB_sRNA_02157	AATATAAAAAAAGACCGCACTTTTAAAGTGCGGTCTGAAAATCAAAAGAAA	y	1	n		n		26	10	7	8	51	29.4118	n
436	HiB_sRNA_02158	ATGCAATGATTATGGTTGTTTTTAGTATGTCTGTTGTCGTGGGGCTTGCACTTTCAATCTTTTAATCAAATCAACTTTTTATTATCACCGCAGTTTTGTTTCTACAAAGTGCGGTGATTTTTTTTC	y	1	n		n		26	58	19	23	126	33.3333	n
437	HiB_sRNA_02173	ACTAATGGTCAGTAGGGCTTTTAACCCCTGTCAGCATTCAGGG	n		n		n		10	12	10	11	43	48.8372	n
438	HiB_sRNA_02174	GAGCAAGGGGCAGTTGCCTACCCCTTGTGTTTAGTCGGTTATGCTTAATATGCTGGGGAGCTTAAA	y	1	n		n		14	20	12	20	66	48.4848	y
439	HiB_sRNA_02178	GGATGAAAAAAACGCCACTCAATGAGAGCAGCGTTTAACCAAATCGGTTTAATAATATACAGGAAGTAAATGAGTAACAAATTGTTACTCAAGTTCGGTTTCCCGAACTATATGCAAACA	y	1	y	GcvB RNA	n		48	29	21	22	120	35.8333	y
440	HiB_sRNA_02185	AGAGTTGTTAAACAAAGCTGATCGAGATTGAGTTACTGCCTGACCCGCCAGTCAGGCAATAACG	n		n		n		20	14	14	16	64	46.875	y
441	HiB_sRNA_02186	TTTAGGTTGCTACCAAGCTGGGGAGCTAAAGGACAGCAACAAGAACCCGATAATA	n		n		n		20	10	11	14	55	45.4545	y
442	HiB_sRNA_02187	AAGGCAACAAGGTTTCTTGTTGCCTTAGTTG	y	1	n		n		7	11	5	8	31	41.9355	n
443	HiB_sRNA_02197	AACCCTAGTTAAGTGACTGTTTAGA	n		n		n		8	8	4	5	25	36	y
444	HiB_sRNA_02198	ACTTTTGAACGTTCCTTTGGCGTAAACAAAGGAATTGAATTTGTCAAAAGGTAA	n		n		n		19	17	7	11	54	33.3333	n
445	HiB_sRNA_02223	ATTAAATAAAATCCCCTATGCCGATAAGCTATAGGGGATTTACTACATTAATA	y	2	n		y	xylB	21	16	9	7	53	30.1887	n
446	HiB_sRNA_02226	TCAAGATAAAAATAGCCAGAATAACTGGCCATTTTTATATCCAAT	y	2	n		n		19	13	8	5	45	28.8889	n
447	HiB_sRNA_02233	AGAGAGGAAAGCAGAAAAACCTAACTTTTGCTAGGTTTTCCTATGTTTATTATTTTGCACAGTTACAGTGTG	y	1	n		n		22	25	10	15	72	34.7222	y
448	HiB_sRNA_02265	AAGATTTAGTTGGTAAGAATAGTATTTTCTAT	n		n		n		11	14	1	6	32	21.875	y
449	HiB_sRNA_02280	CAGGCAAAAAGAAAGGCACGGAATGTGCCTTTTCTTTATTTTACTGCCGTGGGTATACCTACCCTAGGTAGTGTGTACCTACCCTAGGCAATCAACCGTGGGTAAGTATACCCA	y	6	n		n		31	30	27	26	114	46.4912	y
