# Supplementary material for: Bacterial small RNAs may mediate immune response differences seen in respiratory syncytial virus versus rhinovirus bronchiolitis
Source: Front Immunol. 2024 Feb 12;15:1330991. doi: 10.3389/fimmu.2024.1330991 (PMC10895043; doi:10.3389/fimmu.2024.1330991)
Supplement: Supplementary file 3 [file DataSheet_3.xlsx]

## Sheet: SupplementaryData3
Number	sRNA	Gene Sequence	RITT?	# RITTS	Rfam annotation?	Rfam descriptions	Blast annotation?	Blast gene	#A	#T/U	#C	#G	Length	C+G%	Detected in M35?
1	Mn_sRNA_00023	GACTAAGTTTCTGTTAAGTGCAGAAACTTAGTCCAATTAAGT	n	0	n		n		14	14	6	8	42	33.3333	y
2	Mn_sRNA_00045	CATTAGCTGATGTGGCAGGACTTGCTACTGT	n	0	n		n		6	10	6	9	31	48.3871	y
3	Mn_sRNA_00046	ATAACCGCTAGGTTTGGTGGTGGGAGTATGTCAAC	n	0	n		n		8	10	5	12	35	48.5714	y
4	Mn_sRNA_00098	AAGAAGTTTGGGAAGTGGCTTCTAGCCCGTAGGTTGGGTTGAG	n	0	n		n		9	12	5	17	43	51.1628	y
5	Mn_sRNA_00099	GAATTTGTTGGGTTTCACTATCGTTCAACCCAACCTACGGGCTGAGAAAATA	n	0	n		n		15	15	11	11	52	42.3077	y
6	Mn_sRNA_00127	ACTTAATTGGACTAAGTTTCTGCACTTAACAGAAACTTAGTC	n	0	n		n		14	14	8	6	42	33.3333	y
7	Mn_sRNA_00149	ACAGTAGCAAGTCCTGCCACATCAGCTAATG	n	0	n		n		10	6	9	6	31	48.3871	y
8	Mn_sRNA_00198	CTCAACCCAACCTACGGGCTAGAAGCCACTTCCCAAACT	n	0	n		n		12	6	16	5	39	53.8462	y
9	Mn_sRNA_00199	TATTTTCTCAGCCCGTAGGTTGGGTTGAACGATAGTGAAACCCAACAAATTC	n	0	n		n		15	15	11	11	52	42.3077	y
10	Mn_sRNA_00205	TTGCCGACCTTCTGACAGACAAGTGTCAAAAGCCAAGCCCAGCCGTTGTGTACACA	n	0	n		n		16	11	17	12	56	51.7857	y
11	Mn_sRNA_00209	TGTGTACACAACGGCTGGGCTTGGCTTTTGACACTTGTCTGTCAGAAGGTCGGCAA	n	0	n		n		11	16	12	17	56	51.7857	y
12	Mn_sRNA_00221	AGGTTGGGTAAGCGATAGCGATACCCAAATAGCGATACC	n	0	n		n		13	7	8	11	39	48.7179	y
13	Mn_sRNA_00229	GGCTGTCAGTATCAGATTGATGCTT	n	0	n		n		5	9	4	7	25	44	y
14	Mn_sRNA_00232	CTTAAAATGTCGGGTTTTGTATCTCAACCCAACCTACTGAGCTGATTT	y	1	n		n		12	17	11	8	48	39.5833	y
15	Mn_sRNA_00316	GCAGGCACGGCAGGCACATCCTAATCATGAATAAAA	n	0	n		n		14	5	9	8	36	47.2222	y
16	Mn_sRNA_00345	AAAAATAAACTTAACTTTGCTCAAATAAGGGGCAAAAGTAAAGTTGTATTTTCATAATCACTCGCTTATTGT	n	0	n		n		28	24	10	10	72	27.7778	y
17	Mn_sRNA_00381	AAAAGTTGGACAACTGACCTTTGGGGTGTTTTTTTA	n	0	n		n		9	14	4	9	36	36.1111	y
18	Mn_sRNA_00412	AAGCATCAATCTGATACTGACAGCC	n	0	n		n		9	5	7	4	25	44	y
19	Mn_sRNA_00415	AAATCAGCTCAGTAGGTTGGGTTGAGATACAAAACCCGACATTTTAAG	y	1	n		n		17	12	8	11	48	39.5833	y
20	Mn_sRNA_00497	TTTTATTCATGATTAGGATGTGCCTGCCGTGCCTGC	n	0	n		n		5	14	8	9	36	47.2222	y
21	Mn_sRNA_00563	TAAAAAAACACCCCAAAGGTCAGTTGTCCAACTTTT	n	0	n		n		14	9	9	4	36	36.1111	y
22	Mn_sRNA_00588	GCCTTATCTGTAAGGATGGGGCTTAGGCAAACCTTAGCAATGCAATGTTTGCCTG	n	0	n		n		13	16	11	15	55	47.2727	y
23	Mn_sRNA_00591	AGTTAGGCTGTCTAATTTTGTCAAAAACGGCGTGCATTTGTGTGCCGTTTTTGTTGTTTT	y	1	n		n		10	27	8	15	60	38.3333	y
24	Mn_sRNA_00620	GAGTGATGCACTTAGGGTTTATTGCGAGAATTTTTTGCACA	n	0	n		y	-	10	15	5	11	41	39.0244	y
25	Mn_sRNA_00665	TGTGCAAAAAATTCTCGCAATAAACCCTAAGTGC	n	0	n		y	-	13	8	8	5	34	38.2353	y
26	Mn_sRNA_00713	GATAAAGCAAGTAGCAACCCCCTATAAAACCACAAACTCCCCCAGTTTGTGGTTTTATTCTTTG	y	2	n		n		20	18	17	9	64	40.625	y
27	Mn_sRNA_00882	CAAAAAAAGACCCACTGAAGGAGGGGCAGTGGGTTGAGGAAAAAGTT	y	1	n		n		19	6	6	16	47	46.8085	y
28	Mn_sRNA_00938	ATGGGATGAATCAAATCATCATCAAAAAATTGGCAAGTGATTGTTTTCACTTGTCATTTTTTTATGGTTAGAATTTGCCAAACAGCTGTCCCTAAA	y	1	n		n		31	34	15	16	96	32.2917	y
29	Mn_sRNA_00981	TGTAGGAGATTTATTAAAAGGGCGGATGATTCTGCCCT	y	2	n		n		10	12	5	11	38	42.1053	y
30	Mn_sRNA_01004	ATGTTTGATGGATAACAAAAACCCCAAAAGTCATGCTTTTGGGGTTTTTGGCGTGA	y	2	n		n		16	18	8	14	56	39.2857	y
31	Mn_sRNA_01112	AACTTTTTCCTCAACCCACTGCCCCTCCTTCAGTGGGTCTTTTTTTG	y	1	n		n		6	19	16	6	47	46.8085	y
32	Mn_sRNA_01236	TCACGCCAAAAACCCCAAAAGCATGACTTTTGGGGTTTTTGTTATCCATCAAACAT	y	2	n		n		18	16	14	8	56	39.2857	y
33	Mn_sRNA_01433	AGCTCTACAATCAACCAAAAAGCACCTAAAAGCGAG	n	0	n		n		17	4	10	5	36	41.6667	y
34	Mn_sRNA_01447	ACCCATCAGCAAGGAAGACGGCAAATGGACATGCCACCACGGATGAATGCTGATACATGAACCACGGATGATGAATGGAAGACAAAACCCATGCGGTAAGC	n	0	n		n		38	13	24	26	101	49.505	y
35	Mn_sRNA_01466	ATCAAAAAACCCCATTTATCAAAAGATGGTAAATGGGTTGGAGAAAGTGTT	n	0	n		n		21	13	6	11	51	33.3333	y
36	Mn_sRNA_01516	TGGTTTTGGCGTTTGGTGACTTTGTTTGGAGCTT	n	0	n		n		2	17	3	12	34	44.1176	y
37	Mn_sRNA_01539	ATGGGTTTTGTCTTCCATTCATCATCCGTGGTTCATGTATCAGCATTCATCCGTGGTGGCATGTCCATTTGCCGTCTTCCTTGCTGATGGGTG	n	0	n		n		12	36	22	23	93	48.3871	y
38	Mn_sRNA_01540	TGAGACGATAAAGCCCTAACTTGTGTCAGGGC	n	0	n		n		9	7	7	9	32	50	y
39	Mn_sRNA_01712	AAACATGATTGAACTGACCCCTAAATATTAAGATTTGGGGGTTTTTCATCAT	y	1	n		n		17	18	8	9	52	32.6923	y
40	Mn_sRNA_01981	ATGATGAAAAACCCCCAAATCTTAATATTTAGGGGTCAGTTCAATCATGTTT	y	1	n		n		18	17	9	8	52	32.6923	y
41	Mn_sRNA_02172	CACCAAAGACAACAAGAGCGGAACAACAAAAAGCC	n	0	n		n		19	0	10	6	35	45.7143	y
42	Mn_sRNA_02211	GGCTTTTTGTTGTTCCGCTCTTGTTGTCTTTGGTG	n	0	n		n		0	19	6	10	35	45.7143	y
43	Mn_sRNA_02234	CAACATATCCCCATTGGCGACACCCAGATTGGAC	y	1	n		n		10	6	12	6	34	52.9412	y
44	Mn_sRNA_02245	TCTGCTTTGACCCAAAAAACGCATGAGCTTGGCTTGTGCGTTTTTG	y	1	n		n		9	16	10	11	46	45.6522	y
45	Mn_sRNA_02271	GTCCAATCTGGGTGTCGCCAATGGGGATATGTTG	y	1	n		n		6	10	6	12	34	52.9412	y
46	Mn_sRNA_02273	TCAAACCGTCGCCCTATTTTTATCCTAAGAGTTTTTACCAATTTTTTTAAAATTGGCATTTTAGGACCTTATCTTTGGCTTTGACTTAATAAAAATAGGGG	n	0	n		n		28	41	17	15	101	31.6832	y
47	Mn_sRNA_02274	ATCAATTTTGGGGGAATGGGTTTTGACCTATAAAACCCATATCACCCAAAAACCAAAGTAGCACAAGGCGTTATTTATTGGCATTTTGCCTTAGCATT	n	0	n		y	-	31	30	19	18	98	37.7551	y
48	Mn_sRNA_02398	TGGTTTGTCCGTGAGTGACAGACCAAAACCAACATTTATTTAACCTT	n	0	n		n		14	15	10	8	47	38.2979	y
49	Mn_sRNA_02437	GTTAAATAAATGTTGGTTTTGGTCTGTCACTCACGGACAAACCA	n	0	n		n		13	14	8	9	44	38.6364	y
