# Supplementary material for: Bacterial small RNAs may mediate immune response differences seen in respiratory syncytial virus versus rhinovirus bronchiolitis
Source: Front Immunol. 2024 Feb 12;15:1330991. doi: 10.3389/fimmu.2024.1330991 (PMC10895043; doi:10.3389/fimmu.2024.1330991)
Supplement: Supplementary file 4 [file DataSheet_4.xlsx]

## Sheet: SupplementaryData4
Number	sRNA	Gene Sequence	RITT?	# RITTS	# Rfam	Rfam desc	Blast annotation?	Blast gene	#A	#T/U	#C	#G	Length	C+G%	Detected in M35?
1	Sp_sRNA_00001	GAAGGTAAGGTTCTTCCAGGACTTGCAGCCTTGACAGAA	n	0	n		y	-	11	9	8	11	39	48.7179	y
2	Sp_sRNA_00005	AATAGCCACACTGCCCGGAGTCAAGCTCAGCAAACAGCGTGGTTAAGGCATCG	n	0	n		n		16	8	15	14	53	54.717	y
3	Sp_sRNA_00044	ACATTTATCACCCAGATTTTTCTGGGTGATTTTGTCATAG	y	1	n		y	pbp1a	9	17	7	7	40	35	y
4	Sp_sRNA_00045	AAATCTCCAGACTAGAGAACTCACGGATAGTTCC	y	6	n		n		12	7	9	6	34	44.1176	y
5	Sp_sRNA_00069	CAACTTTGACCGCATCAGCGAGATTGCCCAACAGTATGTTACACTCAGATAAAAT	n	0	n		y	-	19	13	14	9	55	41.8182	y
6	Sp_sRNA_00074	TGACGTGGTTTGAATTTGATTTTCGAAGAGTATAAAAACTCTAGCCTTCA	n	0	n		1y, 5n	-	15	18	7	10	50	34	n
7	Sp_sRNA_00077	AGCACTGCTTTGAGGTTGTAGATGAAG	n	0	n		n		7	8	3	9	27	44.4444	n
8	Sp_sRNA_00080	TCTGATTCCTTTTTTCTATGCT	n	0	n		n		2	13	5	2	22	31.8182	n
9	Sp_sRNA_00084	CAAGAAAAAGCCTAGATAACTAGACTTTTTTAGCTTATTCTACCGTTACTGACTTGGCAAGG	y	1	n		y	glmS	20	19	12	11	62	37.0968	y
10	Sp_sRNA_00087	AGCCGCCTGATTGGGCGACTTTATTTTTATAGGGAGATTATTATGAAAAAGTTTTAGGAGTTTAAGTTAAGGTCTTCTTAACTTATGAAC	y	2	y	Cia-dependent small RNA csRNA1	n		26	34	10	20	90	33.3333	y
11	Sp_sRNA_00089	CTCAAGCTTATTTGGTCGTGAGCTTGGGGTCTTTTCTAACCT	y	2	n		n		6	17	9	10	42	45.2381	y
12	Sp_sRNA_00090	TAAAAAACTCCACCTGATTGGGTGGAGTTAAGGGAGATTATTATGA	y	2	n		n		16	13	5	12	46	36.9565	y
13	Sp_sRNA_00091	AGCCACCTGATTGGGTGGCTTC	n	0	n		n		3	6	6	7	22	59.0909	y
14	Sp_sRNA_00110	TAAGACTGGGAATTGCTCCCAGCCTTGATGTTTATAGAGCTGCACGTAAACGTGCTTCTGCATTTTCTACATTACGGACAGAGCGTGGTAGGAAGGCACGAATATCGTCTTCCTTGTAGCCAACTTGCAGGCGTTTT	y	1	n		y	spx	32	41	30	34	137	46.7153	y
15	Sp_sRNA_00119	AAAACAGTCAAAACTCCAAAGAAGTGCAGGACAAAAAAGCCTGCAACATCCATGAGCTTT	n	0	y	Streptococcus sRNA Spd-sr37	n		27	9	14	10	60	40	y
16	Sp_sRNA_00120	AATCTATTTTTCAAGTTAGAGAAAAGGAGT	n	0	n		n		12	10	2	6	30	26.6667	n
17	Sp_sRNA_00124	GACTCTTTACATATTATTTGTTCGTTAGTTCTTAATACCAGCCATTGTTAAG	n	0	n		n		13	23	9	7	52	30.7692	y
18	Sp_sRNA_00135	TAGAAAAACAGCCCCTGAGGACTGTTTGATCTTATACAGTAGCTGCTTGATCCAAGCTTTCACCGA	y	1	n		y	-	19	18	16	13	66	43.9394	y
19	Sp_sRNA_00143	AAGAAGAAAGCCTGAGCCTAATCGCTCGGGCTTTTTCTAT	y	2	n		y	-	11	11	9	9	40	45	y
20	Sp_sRNA_00150	TAAAAAACTCCACCTGATTGGGTGGAGTTAAGGGAGATTATTATGAA	y	2	n		n		17	13	5	12	47	36.1702	n
21	Sp_sRNA_00213	GACTTCCTGTAAGAACTCTTTAAAGTATTCCCTACAAATACCATATCCTTTCAGTAGATAATATACCCTTGTAGGAAG	n	0	n		n		26	25	17	10	78	34.6154	y
22	Sp_sRNA_00217	AGTGTATAAGGTTCATTAGAACACCAAAGCCCCTAACTAGTGCCATAGTTAAGGGCTTTTTTGACG	y	1	y	Streptococcus sRNA SpF66	n		20	19	13	14	66	40.9091	y
23	Sp_sRNA_00219	TAACATCTGCTATAATAGTAAGAGCAAGCTCTGGTATAAGGCTCATTAGTTTCACCTCCTCTCACGAACCCATAGGAACGTAATCGG	n	0	y	Streptococcus sRNA SpF66	n		27	23	21	16	87	42.5287	y
24	Sp_sRNA_00220	AATTGATAAGGTTCATTAGAACACCAAAGCCCCTAACTATGGCCGTAGTTAAGGGCTTTTTTGACG	y	1	y	Streptococcus sRNA SpF66	n		20	19	13	14	66	40.9091	y
25	Sp_sRNA_00222	AGCGAGCTCTATGATAAGGCTCATTAGTTTCACCTCCTCTCACGAACCCA	n	0	n		n		13	13	16	8	50	48	y
26	Sp_sRNA_00233	AGGTTGCTCAAAACATGGTTTTGAGGTTGTAGATGAAACTGACGTGGTTTGAA	n	0	n		n		15	17	5	16	53	39.6226	y
27	Sp_sRNA_00242	AGCAACCTGCGGCTAGCTTCCTAGT	n	0	n		n		5	6	8	6	25	56	y
28	Sp_sRNA_00246	ATGAGTAGCTTTTAATGTGTTTT	n	0	n		n		5	12	1	5	23	26.087	y
29	Sp_sRNA_00251	GGATTTTAGGAACAGTTGCTGGTGCCAATACCTTATTGGTTATTTGTCGAGATCAGCACGTTGCCAAACTCATGGAAGATCGTTTGCTAGATTTGATGAAAGATAAGTAAGGTCTTGGGAGTTGCTCTCAAGACTTATTTTTGAAAA	y	1	n		y	argR	41	49	21	36	147	38.7755	y
30	Sp_sRNA_00254	AAAACTGAACAAGACGAACCAATGTGCAGGGCGCTACAACATAAGTTGTAGTACTGAACAATGAAAAA	n	0	n		n		31	11	12	14	68	38.2353	y
31	Sp_sRNA_00282	GAGGGAGCAAACTCGGTTGGGAAACCAACT	y	1	n		n		10	4	6	10	30	53.3333	y
32	Sp_sRNA_00289	TCCATCGTATTATTTCACGTATGGATGGCGTGACTAGTTACTCTGAAGGTGATGAGCCAAATCGCTATGTTGTTGTAGATACAGAATACGTAAAATCAGGTTTATCCTGATTTTTTG	n	0	n		y	eloR ; kphB	31	42	18	26	117	37.6068	y
33	Sp_sRNA_00297	TGCTAAATAATTCTTGAGTTGATAGAAAGCAAGGCTTTGTGGTCTTGCTTTTTTATATG	y	1	n		y	gap	15	25	6	13	59	32.2034	y
34	Sp_sRNA_00331	GGCTGCATAATCCAAACGAATTCTATCAAAAATCAGTAGGAACTCGAGTCTACTGATTTTT	y	2	n		y	rpmH	21	18	12	10	61	36.0656	y
35	Sp_sRNA_00332	GGAAGCTAGCCGCAGGCTGTACTTGAGTACGGCAAGGTGAAGCTGACGTGGTTTGAAGA	n	0	n		1y, 10n	-	15	12	10	22	59	54.2373	y
36	Sp_sRNA_00334	GAGATAGAACTAAAGGTTGGAACGATTGTCCCAGCCTTTCTTTGCA	y	1	n		n		13	13	9	11	46	43.4783	y
37	Sp_sRNA_00335	TGTACATGGATAGAAAAGAAGCCTGATGGAAACATCGGGCTTTTGATTTGCA	y	2	n		y	pflA	17	14	7	14	52	40.3846	y
38	Sp_sRNA_00341	AAGTATTCTACGTATCTTTGGTCGCAATGACTAAAAGGTCTATGAAATCAGTGTTTTGAGTGACACTGAT	y	1	n		y	-	21	24	10	15	70	35.7143	n
39	Sp_sRNA_00343	GTCCAGACAAGGCTCACAGCAGTTAAATCTTCTGAAAAAGTCAGATTTAGCTGCTCTTTTTGTGC	n	0	n		n		18	20	14	13	65	41.5385	y
40	Sp_sRNA_00350	AAAAAAACAAGGTCAGGATTTTGTTCCTGACCTTTGACAACTTTACCGATTCTTTAGTTCTACATAGCGCTT	y	2	n		y	-	21	25	15	11	72	36.1111	y
41	Sp_sRNA_00392	GCTTTTCATTATAGGTCATATGGGACTTTTTTTCT	n	0	n		n		6	18	5	6	35	31.4286	n
42	Sp_sRNA_00405	GAGGAACTCTTTAAAATGCTTTGATTCCATTGTGGCTCAAAGCATTTTTTATA	y	2	n		n		15	21	8	9	53	32.0755	y
43	Sp_sRNA_00415	AAAAGCTGTATTGGTGCCGAAACTTCACGGTT	n	0	n		n		9	9	6	8	32	43.75	y
44	Sp_sRNA_00423	GAAAAAAGAGACCAAAGAAAGTACTTGGTCTCTCGTTTGATTAGCTCAA	y	1	n		y	trxA	19	12	8	10	49	36.7347	y
45	Sp_sRNA_00427	AAAGTCCATTAACGGGCAGTCTCTGCG	n	0	n		n		7	6	7	7	27	51.8519	y
46	Sp_sRNA_00439	CTTCGCCTTGCCGTATATATGTTACTGACTTCGTC	n	0	n		n		5	14	10	6	35	45.7143	n
47	Sp_sRNA_00443	TGTGAGTCCTGCATTCCCTATCGATAAGATTATCCTCTCAAAAACTC	n	0	n		n		13	15	13	6	47	40.4255	y
48	Sp_sRNA_00446	TTGTGACAGAGGATTTTTTCT	n	0	n		n		4	10	2	5	21	33.3333	y
49	Sp_sRNA_00453	CGCACTCTCTAGTAGAAAGGGACTA	n	0	n		n		8	5	6	6	25	48	y
50	Sp_sRNA_00475	ACCGTTACTTGTCAGAACTTTTCCAAAAAGGTTTGGATGTCACTGATGAAGAAGGTGACGATGTGACAAACGGTATCTTTGTAGGCGCTAAAACTGAAACAGATAAAACAATTTGGATGCTTGCAGCCGAACTTGGACAAGCACCTGGTTTGTAAGAAATAAGGAAACATAGATAAATCTGTAGGAAATTTCTTACAGATTTTTTC	y	2	n		y	-	71	58	32	45	206	37.3786	y
51	Sp_sRNA_00481	CAGCGAGACTTGTTATGATTAACAGGTCTCTTTTTGTTT	y	1	n		n		8	17	6	8	39	35.8974	y
52	Sp_sRNA_00484	TCAAGCCACGTCAGTGTCGCCTTACCGTATATATGTTACTGACTTCGTCAGTTCTATCTACAACCTCAAAG	n	0	n		n		18	22	20	11	71	43.662	y
53	Sp_sRNA_00504	AAGTAAGAGAGGATCAGACTGGTTCTCTCTTTTTGATTT	y	1	n		n		10	15	5	9	39	35.8974	y
54	Sp_sRNA_00510	AATCTTGCTTGGCAAGGTTCT	n	0	n		n		4	8	4	5	21	42.8571	n
55	Sp_sRNA_00511	GCAAGAAAAAATAGGTCTGTTAGATATTTGACAGACTTATTTTTTACAGA	y	1	n		n		19	17	5	9	50	28	y
56	Sp_sRNA_00512	GAGCCAAGTAGGGCAAAATAATGAGCTGGCGCTTTCTGTAGTATTTTCAAAAACAATGAAGTAATAAATTAGGGTGGAACCGCGTTTCTGACGCCCCTAGGTTAAATCAACCTAGGATTGTCAGATGTGGTTCTTTTGCTTATT	n	0	y	Streptococcus sRNA SpR19	n		42	44	24	34	144	40.2778	y
57	Sp_sRNA_00514	CACACTTCAATAAACCATACAACTACATCACAATGGCTGCCCTTACGGCTGAAAAATAAAAATGAATGAGCTATCTGGCCTTAAGTTAAGGTCAGATAGT	n	0	n		y	-	38	24	22	16	100	38	y
58	Sp_sRNA_00524	AAATTCTAATTGGAATGAAAGGCTAGAGAAATCTAGTC	y	1	n		n		16	10	4	8	38	31.5789	n
59	Sp_sRNA_00536	AGTTTTGAGGTTGTAGATAAGA	n	0	n		n		7	8	0	7	22	31.8182	n
60	Sp_sRNA_00538	AAGTATTCTGATGTATAAGGTCTTCAAAATCGGCTAAGAGCCGATTTTGAAGGCTTTTTCTATC	y	2	n		1y, 1n	-	18	23	10	13	64	35.9375	y
61	Sp_sRNA_00554	TCAGAAAAGAGCCCATTATTTTACAGCAATAGGCCCTCAGAGTAAGACTTCTCTA	y	1	n		n		19	14	13	9	55	40	y
62	Sp_sRNA_00557	CAGGCAAGGAGCGCGATAAAGTAGAAGGG	n	0	n		n		11	2	4	12	29	55.1724	n
63	Sp_sRNA_00558	TTGTTTAAGGAGACTTTTCTTTT	n	0	n		n		4	13	2	4	23	26.087	n
64	Sp_sRNA_00561	GAATACGGGCTACGGACGGTG	n	0	n		n		5	3	4	9	21	61.9048	n
65	Sp_sRNA_00569	CTGCAAGGAAATCCTTACAGTTTGAGTTTAGACGTTTAA	y	1	n		y	-	12	13	6	8	39	35.8974	y
66	Sp_sRNA_00575	CCATTGACAGAGATATAAAAAGAACGCTGAGAAGGTGTT	y	2	n		n		16	8	5	10	39	38.4615	y
67	Sp_sRNA_00577	AACTCCCTGATGATTCAAGGAGTTGTCTATAGTTAAATTAGT	y	1	n		y	-	13	15	6	8	42	33.3333	y
68	Sp_sRNA_00584	GTCGCTTTTCATTATAGATCTTATGGGATTTTTTTCT	n	0	n		n		6	20	5	6	37	29.7297	n
69	Sp_sRNA_00585	TAATATCTATAGTGGATTTACCCACTACAAATATTATAGAGCCCAAAGTTT	n	0	n		n		19	17	9	6	51	29.4118	y
70	Sp_sRNA_00589	AAGGCTTTCCGAGTTTTCGGAGAGCCTGTTTTTTTGT	y	1	n		n		5	16	6	10	37	43.2432	y
71	Sp_sRNA_00607	ACAAAAAATGACCACAAATGAACTAGAAAATCAGCTGATTTCTAATTCACCTGTGATCA	n	0	n		n		26	14	12	7	59	32.2034	y
72	Sp_sRNA_00611	AAAAATCCTCACACAAAAAACTTGTGTGAGGACGTCGATGCGCGGTACCACCTCA	y	1	n		y	-	19	10	15	11	55	47.2727	y
73	Sp_sRNA_00618	GAGCAGGTTCACACAACTCATCAAGGTCCGCTCCTGCGTT	n	0	n		n		9	9	13	9	40	55	y
74	Sp_sRNA_00629	TGAAAAAATCCTGATTTTACTTGAAATCAGGATTTTTAACTTACTATTCACTCAAATCATATTCACTT	y	2	n		y	pavA	24	27	12	5	68	25	y
75	Sp_sRNA_00635	TAGAGGTGTACTATTCTAGTTCCAATCCACTATAGTTTGTGGATGAAGCTGGCGAAA	n	0	n		n		16	18	9	14	57	40.3509	y
76	Sp_sRNA_00669	CACTGTTTTGAGGTTGTAGATGAAACTGACGAAGTCAGTAACCATACATACGATAAGGCGATGCTGACGTGGTTTGAAGAGATTTTCGAAGAGTATAAAATC	n	0	n		17y	msrB, treP, glgP	34	28	14	26	102	39.2157	y
77	Sp_sRNA_00686	AAATAAGAAACAGTCCATAGAGGCTGTTTTTTTGTCT	n	0	n		n		12	13	5	7	37	32.4324	y
78	Sp_sRNA_00688	TGACTTCGTCAGTCTTATCTACAACCTCAAAGCAGTGCT	n	0	n		n		10	12	11	6	39	43.5897	y
79	Sp_sRNA_00690	TTACGAACTTCTCTACTAATCTAAAACAAGCTGGGATTGTCCCTGCATGTCTAAGTAAAATCCTTTTTGTCTCAC	n	0	n		y	-	21	26	18	10	75	37.3333	y
80	Sp_sRNA_00708	AGCTGATATAAATATGTCTGCTTCTTTTTTA	y	1	n		n		8	15	4	4	31	25.8065	y
81	Sp_sRNA_00714	AGATTTTACAATCTCCTCATAAAAGCAGCTATT	n	0	n		n		12	11	7	3	33	30.303	y
82	Sp_sRNA_00717	AAAAAGACCGGATTGCTCCGATCTTTTAAAGTTCTGCTCTATG	y	1	n		n		12	14	9	8	43	39.5349	y
83	Sp_sRNA_00724	AACAGCAAGGTTCCACGAAAAATGGGTAGTCTCCACCCTTTCACCGTCTAACCTTAGCTGCCTCTCTGGACTGCT	y	1	n		n		18	19	24	14	75	50.6667	y
84	Sp_sRNA_00733	TTGTAGATAAGACTGACGAAGTCAGT	n	0	n		n		9	7	3	7	26	38.4615	n
85	Sp_sRNA_00734	AAAAAGGCAACGGATTTGCCGTTGCTTTTTTGCATGGTTACGATAGTCTTGGTAAAATAGA	y	2	y	Streptococcus sRNA SpF25	n		18	20	8	15	61	37.7049	y
86	Sp_sRNA_00738	AATATAAATAACCGCTAAGAATAAGGCTTAACGGTTATCTTCTACCTATCTATTT	y	1	n		n		20	19	10	6	55	29.0909	y
87	Sp_sRNA_00758	AAACCACGTCAGCTTCACCTTGCCGTACTCAAGTACAGCCTGCGGCTAGCTTCCTAGTTT	n	0	n		1y, 6n	-	13	16	20	11	60	51.6667	y
88	Sp_sRNA_00763	TAAAAAACATCAAGAAACTTCTTCTGATGTGATTAAATAGGTTCCTGCTCAC	n	0	n		n		19	16	10	7	52	32.6923	y
89	Sp_sRNA_00764	ATAAGCAAGAGGCGAAGATATTTCCCCGCCTCACTTTTCATATTCTTACTAT	y	1	n		n		15	17	13	7	52	38.4615	y
90	Sp_sRNA_00767	GACTCACATATATACGGCAAGGCAACGCTGACGTGGTTTGAAG	n	0	n		n		13	9	9	12	43	48.8372	n
91	Sp_sRNA_00777	TTCGACGACGAGTTAGTAAGGAAGCTAGGCAAACGCCATAGCGATTGCCGTTTTCTGACGAGTTGCTTTAGCTACCGTCAGAATTGCCGAATCGAACACGCCCTAAGCTCTGAGTAAAAAAGATAGA	n	0	n		n		39	29	28	31	127	46.4567	y
92	Sp_sRNA_00787	CGATGCCTTAACCACGCTGTTTGCTGAGCTTGACTCCGGGCAGTGTGGCTAT	n	0	n		n		8	15	14	15	52	55.7692	y
93	Sp_sRNA_00788	TACTTCAAACCTGTTGTGAGGTAAGTTA	n	0	n		n		8	10	4	6	28	35.7143	y
94	Sp_sRNA_00795	AGACGTTGAAGTCGAGATTCACCAAGGTCAACAACCTGTTTACCCATACCTATTTAGTGTGGAATAAGATTAATGAAGGACTGAGAAATCAGTTCTTTTTTC	y	1	n		y	-	33	31	18	20	102	37.2549	y
95	Sp_sRNA_00827	CTATGACAAAATCACCCAGAAAAATCTGGGTGATAAATGT	y	1	n		y	pbp1a	17	9	7	7	40	35	y
96	Sp_sRNA_00828	GGAACTATCCGTGAGTTCTCTAGTCTGGAGATTT	y	6	n		n		7	12	6	9	34	44.1176	y
97	Sp_sRNA_00834	TCTAATGAGTTGTTTGGTCGCTTTTCATTATAGGTCATATGGGACTTTT	n	0	n		n		9	23	6	11	49	34.6939	y
98	Sp_sRNA_00836	AGAAAACCTCTCCGAGGCTGGAGAGGTTGAAATCTTTACTTACGATATAAGCGGTCGTATTGGTAGTATGGGTCAAAGGTTAC	y	1	n		y	-	24	23	13	23	83	43.3735	y
99	Sp_sRNA_00852	ATTTTATCTGAGTGTAACATACTGTTGGGCAATCTCGCTGATGCGGTCAAAGTTG	n	0	n		y	-	13	19	9	14	55	41.8182	y
100	Sp_sRNA_00858	CTGAAGGCTAGAGTTTTTATACTCTTCGAAAATCAAATTCAAACCACGTCA	n	0	n		1y, 5n	-	18	15	11	7	51	35.2941	y
101	Sp_sRNA_00861	CTTCATCTACAACCTCAAAGCAGTGCT	n	0	n		n		8	7	9	3	27	44.4444	n
102	Sp_sRNA_00865	AGCATAGAAAAAAGGAATCAGA	n	0	n		n		13	2	2	5	22	31.8182	n
103	Sp_sRNA_00866	AAAGCAGTGCTTTGAGGTTGCAGATAGAACTGACGAAGTCAGTAACATATATACGGCAAGGCGACGTTGACG	n	0	n		1y, 11n	-	24	15	12	21	72	45.8333	y
104	Sp_sRNA_00870	CCTTGCCAAGTCAGTAACGGTAGAATAAGCTAAAAAAGTCTAGTTATCTAGGCTTTTTCTTG	y	1	n		y	glmS	19	20	11	12	62	37.0968	y
105	Sp_sRNA_00873	TTAAGAAGACCTTAACTTAAACTCCTAAAACTTTTTCATAATAATCTCCCTATAAAAATAAAGTCGCCCAATCAGGCGGCTT	y	2	n		n		31	24	19	8	82	32.9268	y
106	Sp_sRNA_00874	AAGGAATTGAGTACTAGTTCTATATCATAGGTTAGAAAAGACCCCAAGCTCACGACCAAATAAGCTTGAGGTCTTTTTTGACACTATTTGTCCTTGTTTAGCCATTTATCGACTATACGAAGAACGACACCGACCACAATTGGTCCGATGATAGTTTTGAGTACTAATTC	y	2	n		y	-	53	52	34	31	170	38.2353	y
107	Sp_sRNA_00875	TCATAATAATCTCCCTTAACTCCACCCAATCAGGTGGAGTTTTTTA	y	2	n		n		13	16	12	5	46	36.9565	y
108	Sp_sRNA_00877	TAATGAACTCCTAAACTTTTTCATAATAATCTCCTTCAAAAGTCGCCTGTATGGGTGGCTTTTATTTT	y	1	n		n		18	28	13	9	68	32.3529	y
109	Sp_sRNA_00891	GAAGTTTTAGGGGATGTGCACTGTACCATCCCC	n	0	n		n		7	9	8	9	33	51.5152	y
110	Sp_sRNA_00900	AAAACGCCTGCAAGTTGGCTACAAGGAAGACGATATTCGTGCCTTCCTACCACGCTCTGTCCGTAATGTAGAAAATGCAGAAGCACGTTTACGTGCAGCTCTATAAACATCAAGGCTGGGAGCAATTCCCAGTCTTA	y	1	n		y	spx	41	32	34	30	137	46.7153	y
111	Sp_sRNA_00906	ATGAACCCTTTCTAATGAGTTGGTTAGACGCTTTTCATTATAGGTCATATGGGGCTTTTT	n	0	n		n		13	25	9	13	60	36.6667	y
112	Sp_sRNA_00912	AAAGCTCATGGATGTTGCAGGCTTTTTTGTCCTGCACTTCTTTGGAGTTTTGACTGTTTT	n	0	y	Streptococcus sRNA Spd-sr37	n		9	27	10	14	60	40	y
113	Sp_sRNA_00916	CTTAACAATGGCTGGTATTAAGAACTAACGAACAAATAATATGTAAAGAGTC	n	0	n		n		23	13	7	9	52	30.7692	y
114	Sp_sRNA_00930	ATCGGTGAAAGCTTGGATCAAGCAGCTACTGTATAAGATCAAACAGTCCTCAGGGGCTGTTTTTCTA	y	1	n		y	-	19	19	13	16	67	43.2836	y
115	Sp_sRNA_00941	CATAGAAAAAGCCCGAGCGATTAGGCTCAGGCTTTCTTCTTAGTGATCACGGT	y	2	n		y	-	14	14	12	13	53	47.1698	y
116	Sp_sRNA_00947	TAATGAGTTGTTTTGTCGCTTTTCATTATAGGTCATATGGGACTTTTTT	n	0	n		n		9	25	5	10	49	30.6122	y
117	Sp_sRNA_00950	TCATAATAATCTCCCTTAACTCCACCCAATCAGGTGGAGTTTTTT	y	2	n		n		12	16	12	5	45	37.7778	y
118	Sp_sRNA_00951	AAGATAGGTCGGGTATACTATAGACAGTTACAAGAAGACCTCCTAAC	n	0	n		n		18	10	9	10	47	40.4255	y
119	Sp_sRNA_00974	TGAAAACTGAACAAGACGAACCAATGTGCAGGGCGCTACAACATAAGTTGTAGTACTGAACAAT	n	0	n		n		26	12	12	14	64	40.625	y
120	Sp_sRNA_01017	CGTCAAAAAAGCCCTTAACTATGGCACTAGTTAGGGGCTTTGGTGTTCTAATGAACCTTATACACT	y	1	y	Streptococcus sRNA SpF66	n		19	20	14	13	66	40.9091	y
121	Sp_sRNA_01018	CATCGGTTACCGATTACGTTCCTATGGGTTCGTGAGAGGAGGTGAAACTAATGAG	n	0	y	Streptococcus sRNA SpF66	n		14	15	9	17	55	47.2727	y
122	Sp_sRNA_01019	CGTCAAAAAAGCCCTTAACTACGGCCATAGTTAGGGGCTTTGGTGTTCTAATGAACCTTATCAATT	y	1	y	Streptococcus sRNA SpF66	n		19	20	14	13	66	40.9091	y
123	Sp_sRNA_01020	TTGTATTTCGTCTGCAGATGGCTAGATAGTAAGGAGTAGACCGAGTGACTAGC	n	0	y	Streptococcus sRNA SpF66	n		14	15	8	16	53	45.283	y
124	Sp_sRNA_01021	ATGGGTTCGTGAGAGGAGGTGAAACTAATGAGCCTTAT	n	0	n		n		11	10	4	13	38	44.7368	y
125	Sp_sRNA_01030	TTCAAACCACGTCAGTTTCATCTACAACCTCAAAACCATGTTTTGAGCAACCTGCGGCTAGCTT	n	0	n		n		18	18	19	9	64	43.75	y
126	Sp_sRNA_01039	ACTAGGAAGCTAGCCGCAGGTTGCT	n	0	n		n		6	5	6	8	25	56	y
127	Sp_sRNA_01047	TTTTCAAAAATAAGTCTTGAGAGCAACTCCCAAGACCTTACTTATCTTTCATCAAATCTAGCAAACGATCTTCCATGAGTTTGGCAACGTGCTGATCTCGACAAATAACCAATAAGGTATTGGCACCAG	y	1	n		y	argR	43	36	30	20	129	38.7597	y
128	Sp_sRNA_01081	AGTTGGTTTCCCAACCGAGTTTGCTCCCTC	y	1	n		n		4	10	10	6	30	53.3333	y
129	Sp_sRNA_01090	TTGTAGGAACCTCCAAAAGTTGGACAAAATGATTGAAA	n	0	n		n		16	9	5	8	38	34.2105	y
130	Sp_sRNA_01096	CATATAAAAAAGCAAGACCACAAAGCCTTGCTTTCTATCAACTCAAGAATTATTTAGCAA	y	1	n		y	gap	26	15	13	6	60	31.6667	y
131	Sp_sRNA_01128	AAATAAAAATCAGTAGACTCGAGTTCCTACTGATTTTTGATAGAATTCGTTTGGATTATGCAGCC	y	2	n		y	rpmH	21	22	10	12	65	33.8462	y
132	Sp_sRNA_01129	TCTTCAAACCACGTCAGCTTCACCTTGCCGTACTCAAGTACAGCCTGCGGCTAGCTTCC	n	0	n		1y, 10n	-	12	15	22	10	59	54.2373	y
133	Sp_sRNA_01131	TGCAAAGAAAGGCTGGGACAATCGTTCCAACCTTTAGTTCTATCTC	y	1	n		n		13	13	11	9	46	43.4783	y
134	Sp_sRNA_01132	TGCAAATCAAAAGCCCGATGTTTCCATCAGGCTTCTTTTCTATCCATGTACA	y	2	n		y	pflA	14	17	14	7	52	40.3846	y
135	Sp_sRNA_01138	ATCAGTGTCACTCAAAACACTGATTTCATAGACCTTTTAGTCATTGCGACCAAAGATACGTAGAATAC	y	1	n		y	-	24	19	15	10	68	36.7647	y
136	Sp_sRNA_01140	GCACAAAAAGAGCAGCTAAATCTGACTTTTTCAGAAGATTTAACTGCTGTGAGCCTTGTCTGGAC	n	0	n		n		20	18	13	14	65	41.5385	n
137	Sp_sRNA_01146	AAGCGCTATGTAGAACTAAAGAATCGGTAAAGTTGTCAAAGGTCAGGAACAAAATCCTGACCTTGTTTTTT	y	2	n		y	-	25	20	11	15	71	36.6197	y
138	Sp_sRNA_01198	ATTATACTCAATGAAAATCAAAGAACAAACTAGGAAGCTAGCCACAGGTTGCTCAAAACACTATTTTGAGGTTGCAGAT	n	0	n		1y, 5n	-	32	19	14	14	79	35.443	y
139	Sp_sRNA_01204	TATAAAAAATGCTTTGAGCCACAATGGAATCAAAGCATTTTAAAGAGTTCCTC	y	2	n		n		21	15	9	8	53	32.0755	y
140	Sp_sRNA_01215	AACCGTGAAGTTTCGGCACCAATACAGCTTTT	n	0	n		n		9	9	8	6	32	43.75	y
141	Sp_sRNA_01216	CTGCTTAATTGCGCGGGTTCAAT	n	0	n		n		4	8	5	6	23	47.8261	y
142	Sp_sRNA_01217	TAGAAACGCTGTGGTGTACGACTTCACACTTAAGTGTTGACCGACTATTTTTTGTATTATTAGGGAAACAAAAGTCTTCTAACAGCATGTAGGCCGTCTCACACGG	n	0	n		n		30	32	21	23	106	41.5094	y
143	Sp_sRNA_01221	TTGAGCTAATCAAACGAGAGACCAAGTACTTTCTTTGGTCTCTTTTT	y	1	n		y	trxA	12	18	9	8	47	36.1702	y
144	Sp_sRNA_01225	CGCAGAGACTGCCCGTTAATGGACTT	n	0	n		n		6	6	7	7	26	53.8462	y
145	Sp_sRNA_01239	GAGTTTTTGAGAGGATAATCTTATCGATAGGGAATGCAGGACTCACACCATCT	n	0	n		n		16	15	9	13	53	41.5094	y
146	Sp_sRNA_01243	AGAAAAAATCCTCTGTCACAA	n	0	n		n		10	4	5	2	21	33.3333	n
147	Sp_sRNA_01280	CTTTGAGGTTGTAGATAGAACTGACGAAGTCAGTAACATATATACGGTAAGGCGACACTGACGTGGCTTG	n	0	n		n		21	18	11	20	70	44.2857	y
148	Sp_sRNA_01300	AAATCAAAAAGAGAGAACCAGTCTGATCCTCTCTTACTT	y	1	n		n		15	10	9	5	39	35.8974	y
149	Sp_sRNA_01305	AAAGAACCTTGCCAAGCAAGATTCTTTTAGTGTCTAACTTAAAT	y	1	n		n		16	14	8	6	44	31.8182	n
150	Sp_sRNA_01306	TCTGTAAAAAATAAGTCTGTCAAATATCTAACAGACCTATTTTTTCTTGC	y	1	n		n		17	19	9	5	50	28	y
151	Sp_sRNA_01307	AATAAGCAAAAGAACCACATCTGACAATCCTAGGTTGATTTAACCTAGGGGCGTCAGAAACGCGGTTCCACCCTAATTTATTACTTCATTGTTTTTGAAAATACTACAGAAAGCGCCAGCTCATTATTTTGCCCTACTTGGCTC	n	0	y	Streptococcus sRNA SpR19	n		44	42	34	24	144	40.2778	y
152	Sp_sRNA_01310	TGGGGACAGATTGGCTAAAAACTATCTGACCTTAACTTAAGGCCAGATAGCTCATTCATTTTTATTTTTCAGCCGTAAGGGCAGCCATTGTGATGTAGTTGTATGGTTTATT	n	0	n		y	-	29	40	18	25	112	38.3929	y
153	Sp_sRNA_01337	GATAGAAAAAGCCTTCAAAATCGGCTCTTAGCCGATTTTGAAGACCTTATACATCAGAATACTT	y	2	n		1y, 1n	-	23	18	13	10	64	35.9375	y
154	Sp_sRNA_01346	AACTCTCGATAAGAAAAATGCACTGATTGATTACATCAGCGCACTTTTATGCTTATCCTACTTTAGCAACCAATTCTTCTGCGAAT	y	1	n		y	-	27	28	20	11	86	36.0465	y
155	Sp_sRNA_01352	TAGAGAAGTCTTACTCTGAGGGCCTATTGCTGTAAAATAATGGGCTCTTTTCTGA	y	1	n		n		14	19	9	13	55	40	y
156	Sp_sRNA_01356	CAAAAAGAAAAGTCTCCTTAAACAAGGAGACTTGAA	y	1	n		n		18	6	6	6	36	33.3333	y
157	Sp_sRNA_01365	TGCCAAATGGACTTGGCAACCAGATATCGCCTATCGTCAAGATGGTCGCTTAGAATAAAAAAATTTCCTGCAAGTTTATGCCTTGCAGGATTTTT	y	2	n		y	zwf	28	29	19	19	95	40	y
158	Sp_sRNA_01366	TTAAACGTCTAAACTCAAACTGTAAGGATTTCCTTGCAG	y	1	n		y	-	13	12	8	6	39	35.8974	y
159	Sp_sRNA_01383	AAACTTTGGGCTCTATAATATTTGTAGTGGGTAAATCCACTATAGATATTA	n	0	n		n		17	19	6	9	51	29.4118	y
160	Sp_sRNA_01387	ACAAAAAAACAGGCTCTCCGAAAACTCGGAAAGCCTTATTTTAAGCTGTTTC	y	1	n		n		19	13	12	8	52	38.4615	y
161	Sp_sRNA_01398	TTTTATTTTTTAAGGTTGTAGAATGATTTCAATCCACGATATTCAGCTACTTCACCAAGTTGGTCTTCGATA	n	0	n		y	eno	19	30	12	11	72	31.9444	y
162	Sp_sRNA_01406	TGATCACAGGTGAATTAGAAATCAGCTGATTTTCTAGTTCATTTGTGGTCATTTTTTGT	n	0	n		n		14	26	7	12	59	32.2034	y
163	Sp_sRNA_01411	TGAGGTGGTACCGCGCATCGACGTCCTCACACAAGTTTTTTGTGTGAGGATTTTT	y	1	n		y	-	10	19	11	15	55	47.2727	y
164	Sp_sRNA_01413	AACCGAAAGAGGATTAGTATATAGAGAAAGCCTTTTTTAAGG	n	0	n		y	-	17	11	4	10	42	33.3333	y
165	Sp_sRNA_01417	AACGCAGGAGCGGACCTTGATGAGTTGTGTGAACCTGCTC	n	0	n		n		9	9	9	13	40	55	y
166	Sp_sRNA_01420	ACAGCATTTAAAGAAATGAACTAGAATCGATAAAATCTGATTACAAGATGTAGTCAGATTTTG	y	1	y	Streptococcus sRNA SpF36	y	sdbB	27	18	7	11	63	28.5714	y
167	Sp_sRNA_01431	TTTCGCCAGCTTCATCCACAAACTATAGTGGATTGGAACTAGAATAGTACACCTCTA	n	0	n		n		18	16	14	9	57	40.3509	y
168	Sp_sRNA_01470	GTCAGTCCAATGACTGAACTGCCCCCCAAAAGTTAGACAGAAAAAATCTAACTTTTGGGGTGTTT	y	2	n		1y, 1n	-	21	17	14	13	65	41.5385	y
169	Sp_sRNA_01477	GTCTGAGTCGCTCTTTGAGTGGCAAGGGTCTT	n	0	n		n		4	11	6	11	32	53.125	y
170	Sp_sRNA_01481	AGCACTGCTTTGAGGTTGTAGATAAGACTGACGAAGTCAG	n	0	n		n		12	10	6	12	40	45	y
171	Sp_sRNA_01483	ACTATAAAAAAATCCTATTTGTGAGACAAAAAGGATTTTACTTAGACATGCAGGGACAATCCCAGCTTGTTTTAGATTAGTAGAGAAGTTCGTAAAT	n	0	n		y	-	37	29	13	18	97	31.9588	y
172	Sp_sRNA_01502	ATCATTAAAAAAGAAGCAGACATATTTATATCAGCT	y	1	n		n		17	10	5	4	36	25	y
173	Sp_sRNA_01506	TTCAGAAATAAAAAAGTATCGTTTTTATTTCTGAAGCTAGTAACTCT	n	0	n		n		17	18	6	6	47	25.5319	y
174	Sp_sRNA_01509	AATAGCTGCTTTTATGAGGAGATTGTAAAATCTCCTTTTTT	n	0	n		n		11	18	5	7	41	29.2683	n
175	Sp_sRNA_01513	CATAGAGCAGAACTTTAAAAGATCGGAGCAATCCGGTCTTTTT	y	1	n		n		14	12	8	9	43	39.5349	y
176	Sp_sRNA_01519	TGTCTAATCTTGTAAGCTGAACTCTAATTCGTAT	n	0	n		n		9	14	6	5	34	32.3529	y
177	Sp_sRNA_01529	ACTGACTTCGTCAGTCTTATCTACAA	n	0	n		n		7	9	7	3	26	38.4615	n
178	Sp_sRNA_01531	TCTATTTTACCAAGACTATCGTAACCATGCAAAAAAGCAACGGCAAATCCGTTGCCTTTTT	y	2	y	Streptococcus sRNA SpF25	n		20	18	15	8	61	37.7049	y
179	Sp_sRNA_01535	AAAAATAGATAGGTAGAAGATAACCGTTAAGCCTTATTCTTAGCGGTTATTTATATT	y	1	n		n		21	20	6	10	57	28.0702	y
180	Sp_sRNA_01540	TGAAATAAGAGTAGGACGAATCGATCAGGGCAGCCAAATCGATT	n	0	n		n		17	8	7	12	44	43.1818	y
181	Sp_sRNA_01559	TTGAACTGGAGAGTGGCTGTTTATACTCAATGAAAATCAAAGAGCAAACTAGGAAGCTAGCCGCAGGCTGTACTTGAGTACGGCAAGGTGAAGCTGACGTGGTTTGAAGAGATTTTCGAAGAGTATTATTCTGCAGCTTGTTGCCAACGTTTGGCTAGCATATGAGACAGGCTAGAAATCGCTAGGTTAAAGCTGAAGTAGATGAG	n	0	n		18y	glgP, dinB, treP	63	53	31	59	206	43.6893	y
182	Sp_sRNA_01562	ATAGTAAGAATATGAAAAGTGAGGCGGGGAAATATCTTCGCCTCTTGCTTAT	y	1	n		n		17	15	7	13	52	38.4615	y
183	Sp_sRNA_01564	CTTCAAACCACGTCAGCGTTGCCTTGCCGTATATATGTGAGTC	n	0	n		n		9	13	12	9	43	48.8372	y
