# Supplementary material for: Bacterial small RNAs may mediate immune response differences seen in respiratory syncytial virus versus rhinovirus bronchiolitis
Source: Front Immunol. 2024 Feb 12;15:1330991. doi: 10.3389/fimmu.2024.1330991 (PMC10895043; doi:10.3389/fimmu.2024.1330991)
Supplement: Supplementary file 5 [file DataSheet_5.xlsx]

## Sheet: SupplementaryData5
>ENSG00000069431
ATGGAATA
>ENSG00000085644
CCAGCTGC
>ENSG00000090316
CGTGGGGC
>ENSG00000114209
TACAGTAC
>ENSG00000126259
GAAAGATG
>ENSG00000132356
TTTTCTGT
>ENSG00000144445
TTCTTTTC
>ENSG00000144445
TTCTTTTC
>ENSG00000083067
TAAGAAGGT
>ENSG00000122378
TTCACACAA
>ENSG00000152942
GGCTGGCTT
>ENSG00000158161
TTACCAATC
>ENSG00000158773
TGACGACCT
>ENSG00000183020
TCCTCAGGA
>ENSG00000198522
TAAAGTCTC
>ENSG00000099203
ATGGCAGGGG
>ENSG00000145703
TGGTTTTCTG
>ENSG00000148926
CAGGGCGTAG
>ENSG00000185787
AGAGTGCCTC
>ENSG00000117461
CCACTTCCTCT
>ENSG00000141837
CTCGCCCGGGC
>ENSG00000172113
TCCTGTTCCAG
>ENSG00000196998
CCCCAGGGTCC
>ENSG00000082641
TCTTCCCCAGGC
>ENSG00000095906
AGGTGGCCTTAG
>ENSG00000114107
TTTGATTTGTTT
>ENSG00000122417
AAATTTGACAAT
>ENSG00000137955
AACCAGTACATT
>ENSG00000141837
CCTCGCCCGGGC
>ENSG00000141837
CCTCGCCCGGGC
>ENSG00000157214
AGCAGAAACTCT
>ENSG00000163818
AAATCTTCAGTT
>ENSG00000164022
AGTGGAAGCATT
>ENSG00000173020
AAACGCATAGTC
>ENSG00000186868
CCAGGGGCCTGA
>ENSG00000005700
ACTCCACAGTGAA
>ENSG00000104164
CAAACACAACTTT
>ENSG00000104231
AATCTTTGAATGA
>ENSG00000104872
GGAGACACCCTGA
>ENSG00000127419
GGCTCTGTGGCTG
>ENSG00000132334
TTTATTTGCCAGT
>ENSG00000139354
AATGAGTATGTAT
>ENSG00000165410
CTTGACTGTCATT
>ENSG00000204130
TAAGTGTTTCCTT
>ENSG00000205250
GCGTCTGTGGCTC
>ENSG00000025708
GCGGCAAAGGAGCT
>ENSG00000035115
AAATAGTATACGCT
>ENSG00000128604
CGTCTGCAGCCTTG
>ENSG00000132334
CTTTATTTGCCAGT
>ENSG00000132819
GGCAGGAACGCCCC
>ENSG00000165417
AAAAAAGCAACTCT
>ENSG00000166444
CACGGACCCAGAAT
>ENSG00000003400
TTGATATCATGTTGT
>ENSG00000025708
CGCGGCAAAGGAGCT
>ENSG00000104408
TTTCTTTATGGTTCT
>ENSG00000105287
CGAGGGCACAGGACC
>ENSG00000114209
GATAAATTACAGTAC
>ENSG00000125676
GATGGAAAGTCTTCA
>ENSG00000125746
TTTAACTGGGAGCAT
>ENSG00000135404
GAGGAGACCAGACCC
>ENSG00000139354
ATAATGAGTATGTAT
>ENSG00000140474
ATCATTCTTCTAGGG
>ENSG00000158062
GAGGGGGCGGGTGCT
>ENSG00000158062
GAGGGGGCGGGTGCT
>ENSG00000158062
GAGGGGGCGGGTGCT
>ENSG00000167578
CTGGCTCCACAGAGC
>ENSG00000167996
CACAGGATTCTCACC
>ENSG00000181904
TCCAGCTCAATTGTG
>ENSG00000197948
CCACTGTCATGGGGA
>ENSG00000198131
GCTGGCCACACTCTC
>ENSG00000053501
AGGTGGGCGGGGGTCT
>ENSG00000100722
TATTTCATAATGCATT
>ENSG00000102786
CACATTCTATTTTCTT
>ENSG00000104951
TTTTTCCGAAAATACT
>ENSG00000104951
TTTTTCCGAAAATACT
>ENSG00000104951
TTTTTCCGAAAATACT
>ENSG00000108375
GCTAGGCCTGAACATC
>ENSG00000109332
TGACTTTAAGGTAGCA
>ENSG00000112851
TTTTTGTCCACAGTGC
>ENSG00000126456
CATGAGGAGCGAGGGC
>ENSG00000146221
TCCAAGTCAGGTCATT
>ENSG00000156127
GTTTCTTTTAAAGCAT
>ENSG00000160255
TCTCACTGAAAGGTGT
>ENSG00000163001
TATTGATATATTAATA
>ENSG00000164185
TAGAGAGAAAAGGGCT
>ENSG00000164185
TAGAGAGAAAAGGGCT
>ENSG00000164342
GAATATTTAAATAAAT
>ENSG00000164342
GAATATTTAAATAAAT
>ENSG00000175182
CCAGGCATGATGTGGG
>ENSG00000178053
TCAAATGCATGGCTAT
>ENSG00000203780
ATGAGTGGTGCTCTCA
>ENSG00000221823
TACTCTCTGATAAGAG
>ENSG00000004777
TAATGTTGTCAGATGGT
>ENSG00000112183
TTGATCAGATGGCTGGT
>ENSG00000116678
TTTTTTTTTTTTATTGA
>ENSG00000126456
TCATAGCAGGAACCAGT
>ENSG00000126456
TCATAGCAGGAACCAGT
>ENSG00000126456
TCATAGCAGGAACCAGT
>ENSG00000136244
CAATCAGAAACTATTTC
>ENSG00000136560
CCGAGTCACTGTCTTGA
>ENSG00000136560
CCGAGTCACTGTCTTGA
>ENSG00000146243
CCAGAGGCAGTATTTGT
>ENSG00000149761
AAAGTCGTTTATTATTT
>ENSG00000158062
TTGAGGGGGCGGGTGCT
>ENSG00000158062
TTGAGGGGGCGGGTGCT
>ENSG00000160746
CTGGGCACGCTGGGCAC
>ENSG00000182670
CCCCTTCGTATTAAAGT
>ENSG00000025708
TTTCGCGGCAAAGGAGCT
>ENSG00000025708
TTTCGCGGCAAAGGAGCT
>ENSG00000025708
TTTCGCGGCAAAGGAGCT
>ENSG00000025708
TTTCGCGGCAAAGGAGCT
>ENSG00000074582
GAGCTGAGCCCAGCCTGA
>ENSG00000091106
GCTTCGAGTACACTTTAT
>ENSG00000109113
GAACAGTCTCCTCAGCCC
>ENSG00000117298
GCTCTCTCCGCTTCGTCC
>ENSG00000120833
TTAAAAAAAGAGAAACAT
>ENSG00000135679
CTCTTATAGACAGGTCAA
>ENSG00000163138
TAGCATTTAATGCAATTT
>ENSG00000163644
CTAAGTCCCAGCTGGTAA
>ENSG00000166171
GGGCTGTCTTCACCTTCT
>ENSG00000167904
GGTATTCTTTGGTGCTTA
>ENSG00000243156
CGGGTGGGCAAAGTTTTA
>ENSG00000083312
GCAGCTTAAGTGTATTAGA
>ENSG00000099331
AGGGCCTGGCATGCAGCCT
>ENSG00000104915
TATAAAAAAGGCTGACATT
>ENSG00000119906
TGCACTGTTATACCCTATT
>ENSG00000121749
AAAAAAGCAAGAACAGTGA
>ENSG00000132600
CTTTATTGCTCAAGAGTGG
>ENSG00000133392
CGTTTCCTCGCCTGGTGCA
>ENSG00000137575
TTCCATGGTGCCGTGAATT
>ENSG00000157637
TGACAATGCCGCAGGTGTT
>ENSG00000159842
GCAGCCACCCTGCCTCGGG
>ENSG00000164022
TTTTGGTAGTGGAAGCATT
>ENSG00000170955
AGGCAGGCAACACCAGCCC
>ENSG00000171863
TTTATTTAGTCATTTTTGT
>ENSG00000181061
CAAGACAGCATCTCTTCTT
>ENSG00000183273
TCTTTGTTAACAATTCGCC
>ENSG00000229809
CCAACACAGTTGAATTTCT
>ENSG00000058729
TGAAAGGCATACATTATTGT
>ENSG00000091106
TGGCTTCGAGTACACTTTAT
>ENSG00000091106
TGGCTTCGAGTACACTTTAT
>ENSG00000091106
TGGCTTCGAGTACACTTTAT
>ENSG00000103363
TCCCGAGTCCTGGGGCTTCA
>ENSG00000116205
GGGCTGGAACCGTCCTCAGG
>ENSG00000178750
AAAGTTTTAAAATAGCTTCT
>ENSG00000084710
AGGAGCTCAGGCTCTTGGAAT
>ENSG00000091879
TCCTCAGGTGGACTGGGATGT
>ENSG00000102904
ACGCAGGCTGCCCACAAGTTC
>ENSG00000103494
GGAGCCAGCAAAAAGAAGGTT
>ENSG00000132600
CACTTTATTGCTCAAGAGTGG
>ENSG00000134285
TTTTTTAAAATTTATTATTTA
>ENSG00000135374
GAGCTTGATGCCTGGAGCAGA
>ENSG00000138802
CTTATTCAATTTTATTCTACT
>ENSG00000177225
TTTGCATGCTGCTGCATGGTT
>ENSG00000181904
GGCCCTCTTTTCCTGCCTCAT
>ENSG00000005700
TGCATCTCAACTCCACAGTGAA
>ENSG00000068796
GAATTTTGAAAACCTCTTTTTA
>ENSG00000077238
AGTCATTCCCTTGATGGCTGTG
>ENSG00000099204
TCAAATGCTGAGAATTTTATTC
>ENSG00000100938
GGGAGGGTAGAACTGCTCAGGT
>ENSG00000107186
TGGTTCAATTCTGGCAGCCAAT
>ENSG00000114670
TTTCCTTATTTCAGAAATTCCT
>ENSG00000134242
ATGAGTAATTTAGGTAATTTTT
>ENSG00000136193
TGGGAATTAGATGCTCCTGAAT
>ENSG00000142621
GATTCAACGCGACATTTTAGAG
>ENSG00000153130
AAAACAGAAGGGTGTCAATCCC
>ENSG00000162923
TCATTATTCGCATCAGATTTAT
>ENSG00000167210
AGAGGGTGGGGGCCCTAGCCCC
>ENSG00000177225
TGCTGCTGCATGGTTTTATTCC
>ENSG00000196655
GGGGGTCCATAACAGGTTCAGC
>ENSG00000036054
TTTTTATATAATTTTCTTTTATA
>ENSG00000075785
TGTGCTCAACTCTCACTGCCCCC
>ENSG00000076053
TGCGTGCTACCTTGAGGGAACGT
>ENSG00000099977
CCCAAGAGGAAACTTTAACTCGG
>ENSG00000106477
TTTGCCTAAGTGAGACAAAGTCT
>ENSG00000110917
CCCCTCCACCCTGTTCAGGATAG
>ENSG00000133030
TGGGCTACTCTCCCCAGTGTCCC
>ENSG00000149743
TTTCTTTTTTATAAATTAATATT
>ENSG00000166181
CCATGGTCTGTTACAAAAGTAGG
>ENSG00000167674
GGCTGGGCCTGGCTGCCCGCGGC
>ENSG00000169189
CCGCAGGGACTTTTTGTTCGATT
>ENSG00000173818
GACGGAGCAAAGAGGGGCCGTGG
>ENSG00000183718
TCAGGAGATCGAGACCATCCTGA
>ENSG00000197858
TAGCTGCTGAAACAGACACTCAT
>ENSG00000204351
CATCATGTTTTTACATGGGGCAT
>ENSG00000017427
TAGTTCTTGTTTCCTGCACTCCCT
>ENSG00000062822
CCGCCCCATGGGATGCTTGCAAGG
>ENSG00000067365
CAAGGAGAGTAGTTAGACAACACG
>ENSG00000123415
TCCCATGCAAGGCCCCAAGGGCAC
>ENSG00000126391
TTTTCCACATCTGAATGTACCTTA
>ENSG00000130830
AGTGGGTTCCCCCATTCTACAAGC
>ENSG00000139146
TCCCCTTCTACATAAAAACCTCAG
>ENSG00000143382
CTTGATCAATACAAGTTTATTGAG
>ENSG00000145901
GGAGCCAAATGACACAATCTGGTC
>ENSG00000166377
TATTATTTGCAATTTCTTTTTAAT
>ENSG00000173083
TGTCAGGACTAGTATATTTTATTT
>ENSG00000197748
TCACTTATATAAACACATGTATAT
>ENSG00000115590
TTTGAATTATTTCATTCCATTTATT
>ENSG00000121281
GTTGTTTTCACTGTAGTTTTATTTC
>ENSG00000122033
CAGAGCATGCTTTTCTTTATTAAAA
>ENSG00000134001
ACATTCCAAGGCCGACAGCTCTTAT
>ENSG00000134285
TAAGTTTTTTAAAATTTATTATTTA
>ENSG00000152601
CTACATCTGGGTAACATACTTGTGG
>ENSG00000164144
TTTCTTTTTATTTTCCGCTGTGATT
>ENSG00000253598
TAGGAATTCAGTAATGCTTTAATTG
>ENSG00000078668
AAATCTGATGCTTTCCTCAAACCACA
>ENSG00000100027
AGACAGGAGTGGCTGATTCTGCTGCG
>ENSG00000103126
GAACCTCCTCAAACACCACCCCACAG
>ENSG00000115268
CATGTGCGCCTTTATTAGCTGAGCCA
>ENSG00000118492
TTAATGTTTTTGTTTGCTTTTTTTAT
>ENSG00000126246
TAGTCAGCAAAGTTCTTTATTGGGTG
>ENSG00000135404
ATGAGGAGGCTGAGGAGACCAGACCC
>ENSG00000140575
ACAGCTGACCGTTTATTACCCCTGCT
>ENSG00000149761
TCCAAGAATAAAGTCGTTTATTATTT
>ENSG00000151743
TAGCATTGATCATCTTCAAAAAAGCA
>ENSG00000158552
TACGTTTTATCAACTGCCAAGATCCT
>ENSG00000172009
TCTTTTTCTGTTTCCTTTTAATGACC
>ENSG00000174442
CTTATAGAGGACTTCATCAGCACACT
>ENSG00000204427
CTTCCATAATGAGTCCCAGTTGGTCC
>ENSG00000079337
TGCTCCAGCTCCAGTCCCAGCCCCTCC
>ENSG00000085760
TGAGTTATTTACATTTTTAATGTAATT
>ENSG00000100109
TCTGACTGGTTCTGGACCTGCCACAGT
>ENSG00000116670
GGCATCAGTGGGGTGGCAGGTGCCCCC
>ENSG00000136279
GGGGAAGGGCAAGATGTGCCCTCAGCC
>ENSG00000138758
AGAGAGTAGGGCTTGTCAACAGGATGG
>ENSG00000140548
TGTTAGTTATGATTTTTATTATATTGT
>ENSG00000141837
GAGGGGGCTGGGCTTCCACTTACGGAA
>ENSG00000154277
TTTTCATGTTGAAGGGAAGAGGGGAAA
>ENSG00000159363
GCCAGGAAAATATCATGACTTTATTTG
>ENSG00000165915
TTGGGGGACTGGGTACAGATGGCGAAG
>ENSG00000035115
TTGATTTCTTAATGATAACATTTAATAA
>ENSG00000062822
GCCCCCGCCCCATGGGATGCTTGCAAGG
>ENSG00000065989
GAGGGGAACAGGGACAGAGGTCTGGGGA
>ENSG00000079805
TGCTCATCCTTGTACATTTATTTAGGCA
>ENSG00000104907
GAAGGTGACGTGACATCTCTTTATTGGT
>ENSG00000104907
GAAGGTGACGTGACATCTCTTTATTGGT
>ENSG00000104907
GAAGGTGACGTGACATCTCTTTATTGGT
>ENSG00000109180
ACTCCTTCATGTCCAATGATGTAATTTT
>ENSG00000115268
GTCATGTGCGCCTTTATTAGCTGAGCCA
>ENSG00000126777
GCATGTGTCAAGGTAGGCCAGAGGATGA
>ENSG00000126777
GCATGTGTCAAGGTAGGCCAGAGGATGA
>ENSG00000135316
CTCCAATTTTACAGAGGCCCTACTGTTT
>ENSG00000142541
CATGAGGAATTAACAGTCTTTATTGGGC
>ENSG00000148335
TTCCTCAGTTTCTCCTGCCAGCCCCGGC
>ENSG00000159459
GAGTTGGTAATTTTTGGTTTGCTTTATT
>ENSG00000163913
TTCTGACAGTTTAACTCTTTATTCTCCT
>ENSG00000177225
TTTGCATGCTGCTGCATGGTTTTATTCC
>ENSG00000205923
CCAGTGTGCCCTGCTCACCCCATTAGTG
>ENSG00000041353
TTGGAATATTATTTCTTTATTGTTGAGTT
>ENSG00000054654
TTTGCTTTCTGGAGAATATACATGTTTAT
>ENSG00000054654
TTTGCTTTCTGGAGAATATACATGTTTAT
>ENSG00000109065
ACAGAGTGGCTGCCCACAAGGCCCAGCCA
>ENSG00000116127
GACAAAGAATAAGCTTTATTCAACCAGAC
>ENSG00000133961
TGGACAAGATACATAGCCATAATGATTGC
>ENSG00000133961
TGGACAAGATACATAGCCATAATGATTGC
>ENSG00000133961
TGGACAAGATACATAGCCATAATGATTGC
>ENSG00000133961
TGGACAAGATACATAGCCATAATGATTGC
>ENSG00000136244
ATTTAACAATAACAATCAGAAACTATTTC
>ENSG00000139154
CCTCTTCAACCTCTTCTGCGGCATTGTTC
>ENSG00000143303
TCTTCACCAACTCTCCCAGCCTCCGGATC
>ENSG00000158113
TGCTGGGAACAGCCTTTACTGCCCACGCC
>ENSG00000171811
TGGCTTTTGTTGTTTGTTTAGTGGAACAC
>ENSG00000179841
TTTTTTCTGCCGTGACTCTGGAGAGTAAG
>ENSG00000183742
CCCTCCCATCAAAAACACACGCTTTGTTT
>ENSG00000185862
AAGATCAGCTAAAAAGCAAGTTGTAATAT
>ENSG00000205133
TTCTCTTTCATGCATTGATTGTTGCTTAG
>ENSG00000073792
TCCGTTGTTTTGCTGGTGCCTGTGGGAGCC
>ENSG00000105619
TGAGTGTGGGGTCAGTTTATTGGGCATGCG
>ENSG00000105619
TGAGTGTGGGGTCAGTTTATTGGGCATGCG
>ENSG00000109332
AATGCAGGTTATTCTGACTTTAAGGTAGCA
>ENSG00000115694
ACCTCTGCACTCGCTCCACCAGGTGCACCA
>ENSG00000122417
CTACTACTTAGAGAAAATAAATTTGACAAT
>ENSG00000127328
TCCCCTAATTTAATTCTGTGTTTACAGGAC
>ENSG00000128918
GGCTGGGCTTCATCCTCCTTCTTGGCCTTC
>ENSG00000133943
TTGGTAATGCAAGTGTTTTTTATTTTCTTC
>ENSG00000138674
GCAATATTGAGTGGAAGAGAAGCTGTCCTT
>ENSG00000165325
TAATCTCTTTGTTCAATTTATTGAATGATG
>ENSG00000176108
ACACGCTTTCTGGACCTCAGTGGCCCCTGT
>ENSG00000182196
TCGTCCACAGGCCTTGGCCAGCGGGGGCCC
>ENSG00000185621
AGAATATCTTGAAGATCCACTTTTCCATTC
>ENSG00000185973
TTAAAGACATCTTTTGTTTATTGAACAATT
>ENSG00000010704
TCCTTCCCACAGTGAGTCTGCAGGCTGCGTG
>ENSG00000105221
CGAGCGTGCGTCCTCTGCGTGGGCAGACTGC
>ENSG00000110090
CTCGTTTTCCTTCCCAGCAGCTCCAGTGGAA
>ENSG00000112038
GGGAACAGGAATTTTAGGGTTCATGTCATAG
>ENSG00000112514
GGATCTTCATGATGAGCAGGAACAGGGCTCA
>ENSG00000125449
TTTCGAGAAATTTCATTTGCATGTTGAAATT
>ENSG00000127399
CTGCCAGGCTGTCCTGGGCCATAGGCCACGT
>ENSG00000140548
TAAATGTTAGTTATGATTTTTATTATATTGT
>ENSG00000143776
GGAGAGCGAGAGGTCCCAGTGCTGAGGCAGC
>ENSG00000176406
GGTTGCTGTGACAACAATTTTTTTACAGCTG
>ENSG00000185187
TGATCCTGCACTCTGGGGTGGGAGCTACATA
>ENSG00000186318
GGGAATCTCTATCTTCTGCCCATGGGCCTCC
>ENSG00000186318
GGGAATCTCTATCTTCTGCCCATGGGCCTCC
>ENSG00000186318
GGGAATCTCTATCTTCTGCCCATGGGCCTCC
>ENSG00000005436
TTAAAATTTTAGCATTTTCCAATAAAGTTTAT
>ENSG00000058404
AACTCTGTCCGGCGAAACCAGGGCGCAGCTCT
>ENSG00000065809
GGTGACACACGAGGTCTTGGTGCAGCCTCAGC
>ENSG00000100162
CCATGGTGGCCCTAAAGCCTTCCACCTCCAGG
>ENSG00000104047
AAAATAAAAAGACATAAGTGGCTTGTTAAAAA
>ENSG00000112530
TTTCACAACTCCTTGTTTTATTTAGTTTGGAA
>ENSG00000115268
TGGAGTCATGTGCGCCTTTATTAGCTGAGCCA
>ENSG00000115268
TGGAGTCATGTGCGCCTTTATTAGCTGAGCCA
>ENSG00000115268
TGGAGTCATGTGCGCCTTTATTAGCTGAGCCA
>ENSG00000115268
TGGAGTCATGTGCGCCTTTATTAGCTGAGCCA
>ENSG00000115268
TGGAGTCATGTGCGCCTTTATTAGCTGAGCCA
>ENSG00000115268
TGGAGTCATGTGCGCCTTTATTAGCTGAGCCA
>ENSG00000122033
TTTCTCTCAGAGCATGCTTTTCTTTATTAAAA
>ENSG00000122033
TTTCTCTCAGAGCATGCTTTTCTTTATTAAAA
>ENSG00000141644
CTTGAATCCTACAGTCTGTAGAAGCCTCCAGT
>ENSG00000141971
CTCCTCCTCAATGTCCGCCAGAGACTTGATGG
>ENSG00000147894
GCTTCATCCAGCTTTTATGAAAAGAAAAATTC
>ENSG00000165169
GTTAATGGCTTTAGCCCAACATTTTTAGTCAG
>ENSG00000168237
TGTAGGCCTCCTCTGAACTCCCAAAATGTGAC
>ENSG00000174844
AAACTTTTGGATGTTTTATAAATTTGTCCAAT
>ENSG00000262246
TTCCAGCTTGAGGATGAGCCGTGAGGTGTGCA
>ENSG00000042832
TCGGGTGAGGTTTTTGGGGAGCTCAAGGGCTGG
>ENSG00000064687
GGGCCTCCCCGCGGCCCCGCAGGGGAGGGAGGC
>ENSG00000090612
TTCTAGCATAATCACTAGTGAAATCTATATATT
>ENSG00000097033
TCATGATGGGCAACCTTTCCATAGTCCACCTAC
>ENSG00000099804
TGAGGTAAACTCGGCAAGTTTATTCTGGTGGTG
>ENSG00000104907
CGGGAGAAGGTGACGTGACATCTCTTTATTGGT
>ENSG00000112038
GCTTGGTGAAGGTCGGAATGGCATGAGACCCTG
>ENSG00000115268
CTGGAGTCATGTGCGCCTTTATTAGCTGAGCCA
>ENSG00000165959
GGTCCTGTCTTTTTTATTATCCAGACACACGTA
>ENSG00000168421
CATACATAAGTGTTGTGTGAAGTCTCTTGGGGT
>ENSG00000177989
GAGAGAGGCGGACACGATGCGGACTCGCAGACT
>ENSG00000100485
CCATTCCAGTGTCAATGACTACATATGGCTAAGG
>ENSG00000108465
GTTTTTTCCTCTTTTATTAAGTCCGCTATACTAA
>ENSG00000110719
CCCTAGTCATCTGTGGCAGCGAAGGTGAAGGGAC
>ENSG00000117602
CCTCACAGCGCGCAATCAAAGGTCTGGGGCTCAT
>ENSG00000147676
AAACTAACATACGACTGCCAGTTTCTAAGGAGTG
>ENSG00000164088
CTGACTGTGCAAGGGAATCACGAACACAGAGACG
>ENSG00000175267
AAACCAAATCTTCTGCGTGTTATTAGGAGGGGAG
>ENSG00000183137
TCCAGATATTTTGTGTTTTTATTAAAATCTCTTA
>ENSG00000048162
TAAAATATATTTGCTTTATTATGTACACACTATAT
>ENSG00000085276
TGGACTTGGTCCCACTCTGGTCAACCTTGATAACG
>ENSG00000127452
AAAACTGGGATGGGTCCCAAGGGCAGGTGGAGTAG
>ENSG00000132600
CCCAGCCCTCAGGCCACTTTATTGCTCAAGAGTGG
>ENSG00000135931
GCCAGCTTAAATGCAGCCTCTTGCATGTTATTTTT
>ENSG00000136861
GGGGAAGCACAAGCTTTATTGGCTGAAAGTTCTTC
>ENSG00000136942
TCTCAGCCAGCTGTGCTTTATTGACAATGCGCCCC
>ENSG00000142875
CTGTTAATTTTTCTCAAAGTTTTGTTTTGTTCATA
>ENSG00000163885
TAAGGTTTCCAGCTGATTTTATAGTAAGTGGTGAG
>ENSG00000177600
GTGTAAAAAGGCTTTATTTGCAGGGGAGCAGGAAT
>ENSG00000228300
TGGGGTCAGCACCAGCTGCAGAGACATGGCTGCAT
>ENSG00000010704
TTGTCTCCTTCCCACAGTGAGTCTGCAGGCTGCGTG
>ENSG00000101916
TCTTTATTATGGCGCGAAATCATGACTTAACGTCAG
>ENSG00000106799
TGAAGAAAAAAGGAGAGTTCAGGCAAAGCTGTAGAA
>ENSG00000122417
TACTCTTAAAAGAATGCTGTATTTGATTCAAATAAT
>ENSG00000151240
TTAGTTTTAAAGTAATCTCTCTTCATTCATAAAATG
>ENSG00000160703
TTGGTAGAAGGCACACGGCTTTTTAATAGCAGCAAG
>ENSG00000160953
CGGTAGCTCAGCGAAGGCCCCTTGATGTACTTCTCC
>ENSG00000169554
AAGAAACAGAGGAAAGAGGATGTCAAGACTGTCTTA
>ENSG00000174485
CAATATACATTGAATGTTTACACATACAAATACATC
>ENSG00000179115
AGTAGACACACCACACAGGACAACAGAAGGAACCTG
>ENSG00000204351
TTTGCTGTTTTATCATCATGTTTTTACATGGGGCAT
>ENSG00000039068
CAGCACATGGGTCTGGGGCCCGCCTCTCTCGAGTCCC
>ENSG00000103335
TTGGAGAAATTTTCTGCAAATTTTAATTGATAAGGTT
>ENSG00000109452
TGTATTTGTGTTCCTGTTTATTAACATGTTGGTAAAC
>ENSG00000112531
CATTGGGTGAAGAGTTCAGAGGTCAGAAGGTCATAGG
>ENSG00000130640
CTGACCCCACACCCTTCCTTCCTGTCACAGCCAGGGC
>ENSG00000139116
TCACAGCATTCAGTTTACAACCTATCTTCATTCATGT
>ENSG00000139192
GGGCAGCAGAGCTTCGTTTGCCAAGCTCAGTCGTACT
>ENSG00000141002
TTTTTAAATAAAGACAGTACATTTTATTTTTCCTTTT
>ENSG00000143933
TTTGTACAAGAAATTTAACACATTCTGTACAAGGTCT
>ENSG00000151914
AAATGCTCAAGGAAGGGCCTTGGTAGAACCAATTGCA
>ENSG00000155465
AAACCCCTGCTTTCCACATCAGGATTCCAGATGGTGT
>ENSG00000168071
TGCAGTTCAGCTTTATTCTCATGCCCCTCATGTCCAG
>ENSG00000171863
TACTGTGAATATATACTTTTTATTTAGTCATTTTTGT
>ENSG00000171863
TACTGTGAATATATACTTTTTATTTAGTCATTTTTGT
>ENSG00000171863
TACTGTGAATATATACTTTTTATTTAGTCATTTTTGT
>ENSG00000215187
TCTGTTTATGTATTTATTTATTTATTTATTATACCTA
>ENSG00000216937
CTGCATCTGTTTGTATTCAGCATCTAACAAAACTTGA
>ENSG00000101928
AAGACAGATTTACTTCAGAAGTCAATTGAAATCCTTGC
>ENSG00000105063
AGGACGGAAGATTTGGCCGCCGCTGCCGCACCAGGCAG
>ENSG00000124333
TTCTCTCATATCCTTGGTTAATGGTAACTTCTTCTTTC
>ENSG00000134909
TCCAGCAGAGGCTGCTTCAACTCTATTGCTCGCAGGGC
>ENSG00000136861
GTGGGGGAAGCACAAGCTTTATTGGCTGAAAGTTCTTC
>ENSG00000158552
CTCCAGACCAAGCCCTTGCCCACAGCTTGCGCTCTCTT
>ENSG00000171863
GTACTGTGAATATATACTTTTTATTTAGTCATTTTTGT
>ENSG00000177000
ACAGGAGTGGCTCCAACGCAGGGCGTCAGGACGCAGGG
>ENSG00000177600
GATGTGTAAAAAGGCTTTATTTGCAGGGGAGCAGGAAT
>ENSG00000180316
TGCTCCTCTCCGTGGGATTTAAGGAACATTAGACATGC
>ENSG00000257017
ATCTTGCTTTCAGGCAAGGGCTTCCGGCCAGCCTTGCA
>ENSG00000063177
TCAGCAAAAATCTTTTTAATAAGAGAGTAGGATCCAGGG
>ENSG00000103248
ATGGCGAGTCTGCAGTGAGCTCCGTGGCTGTCCACGAGG
>ENSG00000103248
ATGGCGAGTCTGCAGTGAGCTCCGTGGCTGTCCACGAGG
>ENSG00000103248
ATGGCGAGTCTGCAGTGAGCTCCGTGGCTGTCCACGAGG
>ENSG00000105372
TTACGAATGAGGCAATTTATTAACCCAGCATGGTTTGTT
>ENSG00000105372
TTACGAATGAGGCAATTTATTAACCCAGCATGGTTTGTT
>ENSG00000105372
TTACGAATGAGGCAATTTATTAACCCAGCATGGTTTGTT
>ENSG00000140563
AGACGTTCCTCATGCTTTTTGTTGTCCTTTCCCCACACT
>ENSG00000141837
GGTGCGTGGGGGGCCGGGCGGGCGCCACCTCGCCCGGGC
>ENSG00000173264
TGCTGTGGGCATCTGGCAGCCAGGGCCATGCCCCCCATC
>ENSG00000174276
TGACCAGTCACAGCTTTATTAATGACCAGGGTAACCCGT
>ENSG00000176406
GTAACGCTGGTTGCTGTGACAACAATTTTTTTACAGCTG
>ENSG00000176406
GTAACGCTGGTTGCTGTGACAACAATTTTTTTACAGCTG
>ENSG00000176406
GTAACGCTGGTTGCTGTGACAACAATTTTTTTACAGCTG
>ENSG00000243156
ACAGCACTTCACGGCTCTGCCGCCCACCGGACGGCCCCA
>ENSG00000062822
CTCCCTGGTCCCGCCCCCGCCCCATGGGATGCTTGCAAGG
>ENSG00000101311
TTTTCATAAGCAAATGCCTCCATTTTATCCTTTCATGCAT
>ENSG00000127054
TGGGAGAGGGCAGAGGTGGCGGCTGGGTGAGTTGCCGGCC
>ENSG00000142546
TTGCGCACCCAAGCCGGTTTATTTGGTCTCCCGCACACAC
>ENSG00000147676
CAAGTGAAACTAACATACGACTGCCAGTTTCTAAGGAGTG
>ENSG00000148019
CCCTAGTTTCTTTGCTTTTCTGGTTTTCAGGACAGTCAGA
>ENSG00000159842
GGAAGCCTGGCCCCTCTTGAAAAGCCCCCACAACTTGCTC
>ENSG00000176601
GCATCTGCAGTGGAACTGGGAAGAAAGTCTTGATGTATAT
>ENSG00000176601
GCATCTGCAGTGGAACTGGGAAGAAAGTCTTGATGTATAT
>ENSG00000176601
GCATCTGCAGTGGAACTGGGAAGAAAGTCTTGATGTATAT
>ENSG00000177600
GAGATGTGTAAAAAGGCTTTATTTGCAGGGGAGCAGGAAT
>ENSG00000183336
TCCAGATTTATAATTTAATGGCTGTGCAGATCCCAGTCCC
>ENSG00000184939
TCCTTGAATACGGTTCAGTTTATTTTAAAAGCGTTATTTA
>ENSG00000185760
TGGCTAAAGAACTGCTATGCCTGGAAAGAAAATGAAGAAC
>ENSG00000197008
CTTTCTCTCTAGTGTAAATTTTCTTATGTTCAGTAAGTTG
>ENSG00000197323
TTTTTTTTTTTTTAAACAATTGATTTAAATCCATGTCATT
>ENSG00000197323
TTTTTTTTTTTTTAAACAATTGATTTAAATCCATGTCATT
>ENSG00000063177
TGTCAGCAAAAATCTTTTTAATAAGAGAGTAGGATCCAGGG
>ENSG00000063177
TGTCAGCAAAAATCTTTTTAATAAGAGAGTAGGATCCAGGG
>ENSG00000063177
TGTCAGCAAAAATCTTTTTAATAAGAGAGTAGGATCCAGGG
>ENSG00000063177
TGTCAGCAAAAATCTTTTTAATAAGAGAGTAGGATCCAGGG
>ENSG00000076928
TCTCTTCTTAGATAATATATATTAAAAAATAAACCTCCAAT
>ENSG00000112308
TGCTGCATTCTCTGATCTTCTCCATTTTGCTGGTCAGTACT
>ENSG00000125447
CCTGCCTGGCTTCAAGGTGGAGATCACAGCGTCCTCTGGGG
>ENSG00000136522
TTCAAGAAAAACAAAATGGTAAATTTAATAGTTCAGACATC
>ENSG00000141298
ACAAACATTTCTTCTAGAAAGTCACATGTGTAGGCTCAGAA
>ENSG00000144031
TTCACTGGGCTGCCTCAGGGGGAGAGGTAGCCATAATAACT
>ENSG00000160551
TTTCCCAAGCTTCAGGAGAGCTATCATTTCCAACTAGTACT
>ENSG00000176155
TAATGTTGTAGTTACGGATCTTGGGGGGCCTCTGGCAGCCT
>ENSG00000177885
TTTCTTTAAATAATTGCTTCTTGACTCTTAGACGTTCCGGT
>ENSG00000182446
GGGGAGGCTGCACATCTCGCAGTGGCCTGTGCCTGGCTGGT
>ENSG00000186106
AGGAAACAGGCAATTAATTGCCTCATCTTCCATGAGCTCCT
>ENSG00000091073
CAGCGGGGTGGCCACCAGAGGCGGGCGTGCTGGGGTGCGAGG
>ENSG00000105379
TAGATGTTGAGAGTCAGTTTTATTGCCATCTCTGGGAGGGGC
>ENSG00000105379
TAGATGTTGAGAGTCAGTTTTATTGCCATCTCTGGGAGGGGC
>ENSG00000109065
TCCACGTGGCTGGTCTGCTCCAGAAGCCACTGATGCTCGGAC
>ENSG00000109171
ACTTTCAGGCACTCAAGAATGCTGAAACAGAACATCTGCCAC
>ENSG00000109180
CCCAGGTGGTGAAGATCGTCGTGCTTGTCCTGATCGTAAAGC
>ENSG00000112038
GCTTCCAATCTTATATTCTTTCACGGGAAAATATTGTAATTA
>ENSG00000125991
AGGCCAGGGAGAAAGAGGAGACAGAGGAAGCACCGAGGGTGA
>ENSG00000128159
TCCGAGAACACCTTTATTGTGCACGTCCCCCGCAGAGCAGCC
>ENSG00000128159
TCCGAGAACACCTTTATTGTGCACGTCCCCCGCAGAGCAGCC
>ENSG00000135441
CTATAGATGGGGTTTCTGGGACCACCCTACTTCCTCCTTAAC
>ENSG00000149016
TTAATAAACTAGCAGCTTTATTGCCCTTCAGGGGCCATGTCT
>ENSG00000164114
GGCAAACCGATAAATAACCAAATAATGTAAGAACTAGAATTA
>ENSG00000169738
GAAGCTTACAATTTGTGTTATTAAAAGCAAAATCGGCAAACG
>ENSG00000176014
CATGGGTCCGTTCGTTCTGATGTTTCGTTGTCTGCTCTGTCT
>ENSG00000197057
CGTGTGCCTTTTCCTAGGGGTAAAGGAAGAGAGATCAGGCTT
>ENSG00000079616
GGGTTATACAAAAATTTGAAAAGGCGGAGTGAGGAGACGACGG
>ENSG00000099246
CCCTAAAATAGCAGTTAAAGAGTTTATATACAGAAAGATGTCA
>ENSG00000122026
TTTTTGTAGCCCAGAGGTCCTTTATTTTTTTTTTTAACACCTA
>ENSG00000122026
TTTTTGTAGCCCAGAGGTCCTTTATTTTTTTTTTTAACACCTA
>ENSG00000122026
TTTTTGTAGCCCAGAGGTCCTTTATTTTTTTTTTTAACACCTA
>ENSG00000122026
TTTTTGTAGCCCAGAGGTCCTTTATTTTTTTTTTTAACACCTA
>ENSG00000124772
TGGCCTCTCCCAGGCCCCAGCCACCTGCCTGCTGAGACCAGGT
>ENSG00000125637
GGAGCCTCATCCTGGTGCAGGGACGGGCTCGAGTGGGACTTCT
>ENSG00000136147
GATTGCAATTTGACATGACTCTTGGCTTAGGAAACGGTAATCC
>ENSG00000151914
TTTTCATTGTAATTTTATAATTCAATATTTATTTGTACATCTG
>ENSG00000158486
AAGAATGAAATGCTTTTTATTTTCTGTCTTGAGACAAATGCCA
>ENSG00000158486
AAGAATGAAATGCTTTTTATTTTCTGTCTTGAGACAAATGCCA
>ENSG00000158486
AAGAATGAAATGCTTTTTATTTTCTGTCTTGAGACAAATGCCA
>ENSG00000160472
TCCGTCCACCGTATCTGTATTGAGCAGTCCCCCGGGGACTCCC
>ENSG00000165807
TATAAAGTCAAAGTAGTTTACTTGAGATATGGAATGTACCAGG
>ENSG00000100911
TCCACACAACATATAGATCATTTATTTTCCTTCTAGTCCCGGGT
>ENSG00000100911
TCCACACAACATATAGATCATTTATTTTCCTTCTAGTCCCGGGT
>ENSG00000100911
TCCACACAACATATAGATCATTTATTTTCCTTCTAGTCCCGGGT
>ENSG00000103197
AGGCAATACCGTCCAAGGCCAGTGCAGGAGGGAGGGCCCCGGCC
>ENSG00000106477
TGAAAAGAGGAAGAACATTTATTTGCCTAAGTGAGACAAAGTCT
>ENSG00000112701
GACGGAATGTTAAAGATTTAATAAAAGATCAGTGGAAAATTAAC
>ENSG00000114204
TATTTTTGAGAAATCATCTTTTATTCTGAGGCTGTGCTTTTCAT
>ENSG00000127452
CAGGCAGAGGCGCTTCAGGTTGGGGCACTTCTGGCCCAGGGCTC
>ENSG00000160392
TTTGAAAGTCACAAAAATATATTAAAACAGCAGCTGTCTTCACT
>ENSG00000187391
CCTTTAATTCATGTTTTTCTCTCTCACTCTTTAAGCTTTATTTT
>ENSG00000197238
TAGGGTGGCCCTGAAAAGGGCCTTTTATTGATAGAAAGGGACGC
>ENSG00000003400
GGCGATGTGGCTGGAAGGCAGGCAGAAGGAAGCCTCTGGAAAGAA
>ENSG00000095906
CCTCCTCCAGGGTCCTCATGAGCGCAGGGTCCAGGGGCACGGAGC
>ENSG00000102900
TTCTTTGACTTCATGTTTTTATTAACAGTAGTTTATCTTTTGCAT
>ENSG00000113163
TCCAACATGGAATGTCACACAGCCTTGCTTCAGTCACTGTTAATA
>ENSG00000129197
CTTCAACCCCATAGAATGATGTGAGTCCAAGCTGGCTCTAGAGGA
>ENSG00000145901
TGGCCACACCGTGCAAGTGGCTTCTAGTTTCTTGGCAATCTGAGA
>ENSG00000278705
TGGGCGGCCCTGAAAAGGGCCATTGGAAGAAAACTGACGAAAAGA
>ENSG00000007516
GAGGGTTGCAGACACATATATTTTTGAGGCTGGGTGACGAGAAAAT
>ENSG00000026508
TTACACCCCAATCTTCATGTCCACATTCTGCAGGTTCCTTGTCTCA
>ENSG00000100345
CTTGGGAAATGGATTTTACTGCAAATTCAGAGATGGAAAAGCACAG
>ENSG00000113163
CTCCAACATGGAATGTCACACAGCCTTGCTTCAGTCACTGTTAATA
>ENSG00000114841
TGCTTAGAAAATTCAGCTTTAATGGCCCCAGCCCTTCTGTCTGAGT
>ENSG00000115310
ATCCAGCACACCTTATCCTAGTAAAAACACTGCAGATTTTAAATAC
>ENSG00000126883
TCCACACACTTCCAACCTTATTTAATGCTTTTAATTAAGGTGAGAC
>ENSG00000134313
ATTATTTGGTGAGGAAGTCAACTGTGAGAAGTGACTCGAACTTAGT
>ENSG00000138346
TTAAGCAACATAGTGAGAGCTTTAATTTAAACAAGCAAATAAATAC
>ENSG00000140905
TGCTGGCTTGCGTTATTTCATACTAGTTTATTTAGGAGTTCCATTT
>ENSG00000149743
TTCTTTCTTGTTACTTTTTAAAATTTCTTTTTTATAAATTAATATT
>ENSG00000152763
TAAAATTTTCTAGACTTTATTTAATTATTACATGTAATTATATATT
>ENSG00000160310
CAATGTCCACACAAGAAATTAATTAGACCTCACATTAGGGAAAACA
>ENSG00000163075
TTTGTGACTGGTGAAAATTTTTTATTTGCATAGAGCTAACTTCATT
>ENSG00000166035
AAGGAGTAAGATTCATTTATTCTTTACACTGGGTCTTCATTAAATC
>ENSG00000183598
AGTGGCTCTGAAAAGAGCCTTTAGATCGACCACTTAAAAATATGCC
>ENSG00000100949
TATTCAGTCCCAATAAGTTAAAGGGCAAGGGTAGGGGGCAGGGCCTC
>ENSG00000105499
AACAAGTATTAATTTAATCCACAGAACAACTCCTGGTGGAGCCATCG
>ENSG00000106477
TTCTGAAAAGAGGAAGAACATTTATTTGCCTAAGTGAGACAAAGTCT
>ENSG00000106477
TTCTGAAAAGAGGAAGAACATTTATTTGCCTAAGTGAGACAAAGTCT
>ENSG00000129636
AACTAATCAAGTGAACAGCCATTCCATTATGTAATATTAAAGGCAAG
>ENSG00000141837
GTGCGTGGGGTGCGTGGGGGGCCGGGCGGGCGCCACCTCGCCCGGGC
>ENSG00000161010
TGTCCACATGTGAACTTTTTCTAGGTGGCAGGACAAATTGCGCCCAT
>ENSG00000161249
GACGACCAGTGCTTTTCGGGGCCTCGGTGGTGGTTGCAAGAAATTGC
>ENSG00000163320
TTTAATACTCCACATTTATCTTGATCACAATGGTGGTAACCTCCTAG
>ENSG00000163812
AGGTTGACAGCACTTTTTAGTGTTTGCTTCTCTCCCCACAGCAGCAT
>ENSG00000171365
TAAAATTAAAAAAAAATAAAATTTTATTGTACATAAATTTTAAAAAA
>ENSG00000178896
TGTGTGGGCAGAGGAGGGTTTTATTCTGGACATGGGTGGCTGGGTGG
>ENSG00000182670
TTCTTCGGATTCAACACACTGGTGGATGACACTTTAGTGAAGTGTGA
>ENSG00000184260
TGGGTGGCTCTAAAAAGAGCCTTTGGTCTTGGTTTGTTTGTCTGCAT
>ENSG00000189077
CACCTCTGGGCCTCTCTTTATTGAGGGCACTGGGCCCAGGTCTTCCT
>ENSG00000274997
TGGCTCTGAAAAGAGCCTTTGTTTTCCAGTTTTCACAACCTCGCTCC
>ENSG00000010626
ATCCTCTGTTCTCTGTCATACATGTGGTGGCTGCCCCTGGGAGTCTGA
>ENSG00000017427
AAGGATCCTGCGGTGGCATGTCACTCTTCACTCCTCAGGAGGGTCTTC
>ENSG00000067365
ATACACTCTAAGAACAGTCGAGACGCCGCGCCTTGTGGAGGCGATGGG
>ENSG00000070882
GGCAAGCACAGGAGAAATACACTAATGTTATCTTTCTTCTTTACTTTT
>ENSG00000070882
GGCAAGCACAGGAGAAATACACTAATGTTATCTTTCTTCTTTACTTTT
>ENSG00000079277
TTCTTATGGAATATAACATTTATTTGGTTCAAGATGAGCTAGGAATGA
>ENSG00000100612
ATTATTTATTTTTTATTTCATTCCATGTTGGAAGCAAAGTCATATCTA
>ENSG00000109332
AAAGTTTATTCCAGCTATAATGCAGGTTATTCTGACTTTAAGGTAGCA
>ENSG00000120756
TGTGAGGCATACAATATGTTTAATGTGGCAGAAAATCATATGAAATGA
>ENSG00000120805
GGAGAGAGGTGATGTAGTCTTCATTTCAGGGGAGAAGAATGGACTGAA
>ENSG00000123415
TGAGGCATAGAGAGGTTTATTAATTTGTCAATCAAAAAGTTCCAAGTT
>ENSG00000124143
CTGGTCATGGCTACAATCTTGGCTTCCTCTCCCTGAGGCCCTAGCCCC
>ENSG00000151576
CAGTGGTACAGGCTCAGTGTGAAGAGTGAGACTTGTATTTGCAAGATC
>ENSG00000168876
GTGAGTGGCCTTTTCAGAAAGGAGTCTCCGCACTGTGGTAAGATTGTC
>ENSG00000171806
TTTTTGGTCCTTCTGTTTATTTCATTTTGGATACTCAGTGAATGTTAA
>ENSG00000171806
TTTTTGGTCCTTCTGTTTATTTCATTTTGGATACTCAGTGAATGTTAA
>ENSG00000172922
GTTCCAAAGAGCTGGTTTACTGCTGTGAAGGGATCGCAGCTTTGAATT
>ENSG00000185760
TGCCCGGTCCATGATAAGTACTCCATGGATGTTAGCTTTTAATATTAA
>ENSG00000185760
TTTCCATAAATTCTGGTTTAATAAGTGGAGACTTTTGAGATGTGCATA
>ENSG00000232119
GATACAGCACAATATCCATATTTAGCCCAAGTGCATTCCTTCTGAGGC
>ENSG00000072958
GCCAGTTTTAAAATGCTGTGTTTATTTCTATCGTGGAAGAGATAAAACC
>ENSG00000102125
CAGCCCCAGCTCTGTGCGGGCCAAGAATCCAGAAGGCAGCAAGCAAGGC
>ENSG00000103363
CAGACTCCCAAATCTCTTTTATTGGGGGAAATGGGCCTCTTGGGGGTCC
>ENSG00000112038
AATATCTTGCATCCATGACCACAGTGGGCAAGGCACTCACCCTCTCTCT
>ENSG00000121680
AGGGGCTCCCTGCCCCACCCCTCCCCACACCCTCCTTCCGGGAGGTCTG
>ENSG00000123106
TTGTATGGAAGTCACTGATTCAGTTTATTGAAGCACAAATTAAAACTCT
>ENSG00000135373
TGACAAAGAATCCTGTCATCTGCAGAATCTCTATTCTTCCAGCTGGCTC
>ENSG00000142765
CCAAGGGCAGGCCCTGAGATGGGGGTCCAGAGAGAGAGGCTTGGTGGGG
>ENSG00000149016
GACTGTATTAATAAACTAGCAGCTTTATTGCCCTTCAGGGGCCATGTCT
>ENSG00000151092
CTTCAGTAAGTCCTTGATTATTGCCAGCTTTTCTATAATGTTCAGGTTC
>ENSG00000155324
CTTCAAAGGGAAACATGAGGTATTCCGATGGCCCAAGCAATCTGGTCGA
>ENSG00000248235
CCGTGGGCAGCGTCGGGGATCCGTCTGTAGGTGCTGGTGACTCCAGGCA
>ENSG00000002330
CTGTGGGCGGAAAACCCAAAACTTCCGATGGGACCAAGCCTTCCGTGGCT
>ENSG00000011566
TGGTATTAAAACTAACTTTATTTTGTTTAATGCATTAGGTGATGAAATCA
>ENSG00000062822
TTTATTAATTCTCCCTGGTCCCGCCCCCGCCCCATGGGATGCTTGCAAGG
>ENSG00000086666
GTCAATTTTTAGTTTGCAGATGCTCAAGAATTTTGTATTCCAGCAGGAGT
>ENSG00000090686
ACTCCTCTTCCCCTCTGGTCATTTCTTAGCAGTCAGCAAGTATTCAAAGA
>ENSG00000106772
GAATTCAGTTGATAGTTATTATATATACTGGACATTAAACTCACAAACCA
>ENSG00000115808
GTGCAGTTGATTACTTATAAACAGCTAGAAGGTGAAGATGATGCATTGCG
>ENSG00000135316
CATTACTCCACTGCAAGCTTCTGGTGTAATCCCACATAGCAAGTCAGTCT
>ENSG00000139218
TTAGTAGGAGCTAGCTTTTATTATTTTAATTAAACTTCAGCATTCATTTA
>ENSG00000142512
CTCTACCTTCCTCCCTAGCCGAAGTCCCAGTCCTAAAGCCTAAGAGACCC
>ENSG00000142512
CTCTACCTTCCTCCCTAGCCGAAGTCCCAGTCCTAAAGCCTAAGAGACCC
>ENSG00000148834
TTAGTGAAGGAAAATATCAGACATAGCTTTATTGCTGACTCCTGCCCCCT
>ENSG00000149806
GACTGAACTAAGTGGCTTTTTTATTAGAGAAAGCCAGAATTACAAAAGAC
>ENSG00000149806
GACTGAACTAAGTGGCTTTTTTATTAGAGAAAGCCAGAATTACAAAAGAC
>ENSG00000151135
CAATGCCACTGGCATTACAGTGCTGTGGAGCGCAAGTGTATCTCTATATT
>ENSG00000152763
TTGATAAAATTTTCTAGACTTTATTTAATTATTACATGTAATTATATATT
>ENSG00000159231
TTCATTCATTCCACCAACATTTATTAAGCAGCAAGCTCCGAAGCAGACGT
>ENSG00000173744
ATGTAATGTGACCACATAAAAGTTCGTTCCAGTAAATTGTCTATATAAGG
>ENSG00000173744
ATGTAATGTGACCACATAAAAGTTCGTTCCAGTAAATTGTCTATATAAGG
>ENSG00000034239
TGTGTGTGCCTCCTTTTTTACTCACTTGAGACAATATAGACATTTAGTTAT
>ENSG00000068024
AGCTTCAAGACAGAGACAGACAGACAAGAGAACAGCAGCTTCGAGGGAGTG
>ENSG00000113312
TCGTTAGCTGTGTGATCAGGGAGGGGACAGCAGGCGGGAACCCGTCATCAA
>ENSG00000115221
CATTAACATTTCATATCAGTGAAACAGACTTTTTTCATGCATAAAGTAGTT
>ENSG00000137713
GCAATATGTGTGGTACTTTATTTTTTATGTTCTTTTTTTAAATCTGGGGTA
>ENSG00000147813
TGGGGAAAAGTGAGTGATTCGTGTTGTTTCCAGTCAGCCCCGCTCCGAGTC
>ENSG00000149806
TGACTGAACTAAGTGGCTTTTTTATTAGAGAAAGCCAGAATTACAAAAGAC
>ENSG00000149806
TGACTGAACTAAGTGGCTTTTTTATTAGAGAAAGCCAGAATTACAAAAGAC
>ENSG00000164924
TGGTCTACTGTGTAAATTTTAGAATGAGGCAGACAAAAGTTGGAAGGCCGG
>ENSG00000167552
AAAACAGAATAAGCTTCCCTGTAAAAGCAGCACCTTTGTGACGTTTTAACT
>ENSG00000172009
GAGGAGCAAATGAATGGCAAACGCCAAGCCTTCTCCAGAGAAGGGTCTGTC
>ENSG00000177565
TTTTGGCTATGTACACATTCATAGTCGGTCCATGGCTTCCAACTAGTAGCG
>ENSG00000053747
TTTATCCATCCAACTGATTTATTTTTAAAATTTTATTTATTTACATTTTATT
>ENSG00000105427
GAAGGCCAGAGGCGAGACTGGTGGAAAAGGACGGGGAAGACAGGGAACTTCC
>ENSG00000106052
TTTTTTTTTTTTTTTTTACTGCTAAACTATATTAACTCATAATAAAAAGTAA
>ENSG00000106052
TTTTTTTTTTTTTTTTTACTGCTAAACTATATTAACTCATAATAAAAAGTAA
>ENSG00000110719
CTCTCCTGCCTCAGAGGTCAGGAAGGAGGTCTGGCAGGACCTGCAGTGGGCC
>ENSG00000114209
AAGGCAGTTCAATACTGCCACTGAGAAGTACATCTCTTAACATATACAACTT
>ENSG00000124171
AAATATGATAGTCTTTCCCATGGCAAATATCTCAAGTGAAAAGTAAAGCACT
>ENSG00000124357
AGAGCCCACGCACAGGATGGGGAGTCCAATCTTGCCCTGGAACAAGACCGGG
>ENSG00000129467
TCCAGACACCCCAGAGTCTCTTTATTGAGGTTCTTAGAAGGCGAGTGCAATC
>ENSG00000138674
AACATGTTTCTTTGGAAAAATGGCAATATTGAGTGGAAGAGAAGCTGTCCTT
>ENSG00000159588
TAGGCCCCAGTCCTGTGCATGTTCAGATGCTCATCTCCACATTCACTTGGGT
>ENSG00000163029
TTTTCCCTTCACAAATCCTTCAACATCAGGACAAGGCATGTTAAGTTACAAA
>ENSG00000176155
CCCCAGGGAGGAACCTGGTTTTAATGGGCCCTGTGCTCAGGGAGGCCTTCAG
>ENSG00000216937
TGCATTTCTGAATTTGTCATGTTGCTTATCTTGCTCAGAATTTCCTTCATTC
>ENSG00000276368
TGAAGTGGCTCTGAAAAGAGCCTTTGTTTTTATGCGCTTTTCAACTCGGTCT
>ENSG00000065809
CACCCACAGACAGCTCTGTGGGGTGACACACGAGGTCTTGGTGCAGCCTCAGC
>ENSG00000085760
TTTCTACCTTCAAACAAACAACACGTTGAGTTATTTACATTTTTAATGTAATT
>ENSG00000085760
TTTCTACCTTCAAACAAACAACACGTTGAGTTATTTACATTTTTAATGTAATT
>ENSG00000110330
CAACAATATTTTAAAGACCTTTTTATGCAGGTTAAAATATAGACTATTTTTCT
>ENSG00000115827
GCTGCTGGGGTGTTTGGCTAAAAGTCTCTTAGGTTACAATTATCTCACTCTTT
>ENSG00000115827
GCTGCTGGGGTGTTTGGCTAAAAGTCTCTTAGGTTACAATTATCTCACTCTTT
>ENSG00000122696
TTCTTCTTAGAAGGTCTATTCAGTTGATAAATGGCACTTAACTGATGGTTTTT
>ENSG00000122696
TTCTTCTTAGAAGGTCTATTCAGTTGATAAATGGCACTTAACTGATGGTTTTT
>ENSG00000126259
GGAGGAGTAAGGTCGCCAACTTGTCCTGGCTCCTCAGAAATCAGAACAATCCA
>ENSG00000126259
GGAGGAGTAAGGTCGCCAACTTGTCCTGGCTCCTCAGAAATCAGAACAATCCA
>ENSG00000138674
TAACATGTTTCTTTGGAAAAATGGCAATATTGAGTGGAAGAGAAGCTGTCCTT
>ENSG00000145725
TTGGTTTTTAAATATTTTATTATATTTGAATAAAATTTGTCTCCATCATAATC
>ENSG00000147813
TGTGGGGAAAAGTGAGTGATTCGTGTTGTTTCCAGTCAGCCCCGCTCCGAGTC
>ENSG00000169660
TCACCTGCAGCTTCCACTCTTTATTTCCAAAGAATCAGTGTCACACATGCAGA
>ENSG00000177989
GCGGACTCGCAGACTTTAAGCAAACACGTGTGGGGCCGCTCCCGCCTGGCGGG
>ENSG00000198586
AAGTGTGCATCTGGAAGCAAATTCAAAGATATCATGCCAATCTTGGAGGAAAG
>ENSG00000277775
GGTGGCTCTGAAAAGAGCCTTTGGTTTAAGTTGGCGCACACCCTCAGTACAAC
>ENSG00000079277
TCCCCATTCTTATGGAATATAACATTTATTTGGTTCAAGATGAGCTAGGAATGA
>ENSG00000083067
CACATTTTGAATACTAATTTTATTATACTTTTCTGATATCCCCTCTAGGAGAAG
>ENSG00000103852
AGGTGATTTGTACAGCACCCTAAATGACAGTGCCCAGGAATGTCCTAGGCTTTT
>ENSG00000114698
TCCAACTTTTCCATTTTTCAAAATTAACCATAGTTGATGGCTTGCTGTGTCTCT
>ENSG00000125652
GCTGTCCATTCCCCAACTTTATTCACAAATCTGGTGTCTGTAGAAAGCTGGGGG
>ENSG00000127922
TTAGCTGCATGATCAATGTGAAGCCTGACTCCTGAGTATTGGCAATTCTCCCCG
>ENSG00000134352
TTTTAGCTTTACTTTATAGGTACTGCTGAAGTTGTAGCAGGAACTACTAGTCCT
>ENSG00000144579
GGAGGAGGTGTGGGTATCATTGGTCAGGGGCAGGTCCTGGCCCCATCACCCTCA
>ENSG00000144579
GGAGGAGGTGTGGGTATCATTGGTCAGGGGCAGGTCCTGGCCCCATCACCCTCA
>ENSG00000147789
GTAAGTTAAGGCTATAGGTTTATTCACATATATACACATTTATATGTAAGTGGT
>ENSG00000148834
CATATTAGTGAAGGAAAATATCAGACATAGCTTTATTGCTGACTCCTGCCCCCT
>ENSG00000148834
CATATTAGTGAAGGAAAATATCAGACATAGCTTTATTGCTGACTCCTGCCCCCT
>ENSG00000155329
TGGAGTTTGTTTTTTATTGTTATAAATACGACATTCACAAATATCATCTAAAGC
>ENSG00000171858
TAGGTTTTCATTATTTATTTATGACAAATATTCCACATCTGTGATTCTCTCCAG
>ENSG00000177989
TGCGGACTCGCAGACTTTAAGCAAACACGTGTGGGGCCGCTCCCGCCTGGCGGG
>ENSG00000177989
TGCGGACTCGCAGACTTTAAGCAAACACGTGTGGGGCCGCTCCCGCCTGGCGGG
>ENSG00000178896
GCAGCAGCCTCCAACACCCGCTCCAGGTGGTCCTCGTGCAGCCGGGCATCCATC
>ENSG00000178927
AACGGGAGTGACCTGCTACGGCTGCAGCTCCGGCCAGATCAAAGTCCCACAGCC
>ENSG00000186868
CCACACTCTCTCATTCTCTCCTCTCCACAATTATTGACCGCCCCAGGGGCCTGA
>ENSG00000187609
CACGGCCATGGGCCCAGCAGTCGGGCACTTTCCATGTTTATTGTCTGGCTGTCC
>ENSG00000198223
TCAGGTTTTTATTATTTATTATTATTGTTTGTTTTGAGATGCAATCTTGCTCTG
>ENSG00000198791
TATAATTGCATTCACTGTAATACTTTAAAATATGGTTTAAAACAACATCCCAGC
>ENSG00000205220
TTTAACTGTATTTTCTGGGTTTATTCCCCCTTGTTCCAAGCTCTAAGCCTCAGC
>ENSG00000221968
GCTGGCTTGGTTGCTGGTGCCCTGAGCCCTTCTCTGCCCGCCTGGGTGTTGCCT
>ENSG00000249437
TCCTCAATATGCCCCAAGACAAATTATTGATTCAGCAGTTTTTAGCTGAATCTT
>ENSG00000004897
AGAAACACGTCAGCACTAGTCACACATCCAGTTGTAAAAGTCTGATTTCCAGAAG
>ENSG00000079482
TTTTCAAGGTACGATTGACTCTGCCCAGGGTGGGCAAGTATGTGTATGTTTTACT
>ENSG00000099795
TTGAGGGGCCTGAAGGCTTTTATTTGACTGGTCCATAGGGTGGGGGGTGCACCCC
>ENSG00000117335
TGAAGATTTTAATAGAGTCAAAAGATGAACTGGCAAACCAGGTTGTGGAATCTAT
>ENSG00000125384
ATTTCAAAATGATCTTCCAGATGCTATATAACTAAGAACTTTTAAACTACTGACC
>ENSG00000126545
GATAAGATGGTTTTCCTTGAGAGGAGAAATTCAGAGAATGAAATTTTCAATCATA
>ENSG00000138002
TTATTTATAAAACTTTAATGAGGGAGAGGCCCTAACTCTTCCTCAGCTCTACCAA
>ENSG00000138002
TTATTTATAAAACTTTAATGAGGGAGAGGCCCTAACTCTTCCTCAGCTCTACCAA
>ENSG00000140350
TTCTTCATCTTCCTCGTCATCTACCTCTCCATCGTTATAACCTTCTTCATCCCTG
>ENSG00000143774
ATGCTGCTGCCCTGGTCCTGTATGGGCCCGGGGTGCCGAGAACAGACAGCAAGCC
>ENSG00000158717
GATGCTCTGAGACATTTTATTTAAACTTTTTTTTTTAAAAAAAAGACAGCAATAA
>ENSG00000167766
TGGGTTTCTCTGAAGCAAAAATCTTGTATGTCGTGGCTTTCATGTCTTTCCAACA
>ENSG00000167996
CACAGGATTCTCACCTCAATCTTTGAGGCTGCAGGCAGGCACCCATCTCCCCATT
>ENSG00000168259
TCAAGATTAAACTGAGTGAATCTGCATTTTCTGGGTTCTGGGTGGTTGCCCTTCA
>ENSG00000172243
TTACATTGAAAACTTCTTCTCACAAATACTATATGAGGGCACACTACACAGTTGG
>ENSG00000178028
TCCAACTCAGCAGCTCTATTTACATAACAGCGTCGCCCACACCCCGTGGGGCCTC
>ENSG00000184270
TGGTGGCTCTTAAAAGAGCCTTTGGGGTGAATGAGTATGGTGTCAAGCCTCTTAA
>ENSG00000204406
TTTTTGACTCCCAGATTTACTTTGGTTTTTGCTCGCAGAAGTTGAAAAAGCTCAT
>ENSG00000277157
TAGGTGGCCCTGAAAAGGGCCGTTGGTTTTGCGGTAGTGTACTGTAGAGGTAAGC
>ENSG00000074582
AGTGTGGCAGATGTTTATTGAGCTAGAGGAGGAGAGCTGAGCTGAGCCCAGCCTGA
>ENSG00000074582
AGTGTGGCAGATGTTTATTGAGCTAGAGGAGGAGAGCTGAGCTGAGCCCAGCCTGA
>ENSG00000074582
AGTGTGGCAGATGTTTATTGAGCTAGAGGAGGAGAGCTGAGCTGAGCCCAGCCTGA
>ENSG00000088727
ATTCACCATAAAATATTTGCATCTCTTACTCCTCAGGTTCTTACATAAGACAACAT
>ENSG00000103199
GATGGGGTCTCACGGTGTTGCCCAGGTTGGTCTGGAACTCCTCTCAATCCTCCTGC
>ENSG00000104529
CAGTCTTTAATCGTGGCAGGGCCTCACGCACGCGCGCACGTACACACACTCAGGCT
>ENSG00000104529
CAGTCTTTAATCGTGGCAGGGCCTCACGCACGCGCGCACGTACACACACTCAGGCT
>ENSG00000104529
CAGTCTTTAATCGTGGCAGGGCCTCACGCACGCGCGCACGTACACACACTCAGGCT
>ENSG00000104529
CAGTCTTTAATCGTGGCAGGGCCTCACGCACGCGCGCACGTACACACACTCAGGCT
>ENSG00000104529
CAGTCTTTAATCGTGGCAGGGCCTCACGCACGCGCGCACGTACACACACTCAGGCT
>ENSG00000104529
CAGTCTTTAATCGTGGCAGGGCCTCACGCACGCGCGCACGTACACACACTCAGGCT
>ENSG00000104529
CAGTCTTTAATCGTGGCAGGGCCTCACGCACGCGCGCACGTACACACACTCAGGCT
>ENSG00000104529
CAGTCTTTAATCGTGGCAGGGCCTCACGCACGCGCGCACGTACACACACTCAGGCT
>ENSG00000104529
CAGTCTTTAATCGTGGCAGGGCCTCACGCACGCGCGCACGTACACACACTCAGGCT
>ENSG00000105835
AACAGCAGATCTTGTTTTATTTAGATGAGAAACTGAAAAGTAACAGATGGTAGATC
>ENSG00000124575
TGGGTGGCTCTGAAAAGAGCCGTTTAAAATTTTCAAAGGGGAACGTCCCGCCAGTT
>ENSG00000125503
GGGTGCGTGTGGCAGAAGCAGCTGTATAAATACGGGTGCGGGAAAGTCCCTCCGGG
>ENSG00000160867
TGAGCCCCAAGGCCCAAGGCCACCAGCCTATGTGCCTGCACAGCCTTGAGCCTTGC
>ENSG00000197409
TGGTTGGCTCTGAAAAGAGCCTTTGGGTTTTGGTTAGCACACATTCACAAGACAAT
>ENSG00000203780
TGTATTTCTATGCACTTTATAGGCATGGGGGAAAAAAAACAACTGACAGAGTTCTC
>ENSG00000213853
ATGGTTATCTGAATGTGGATTCTGTACTGCAGCAGAAGCAACCCAGCTCCGGAACT
>ENSG00000270882
TGGTCGGCCCTAAAAAGGGCCTTTGGGATCGAAACGTGCAAAGCTGGAGCGGCGGC
>ENSG00000052841
TTCTTATTCTTTTTTTTTAGAGCATGAGTAAAGAGAAAGAGAGAAGGAAGAAGTGCA
>ENSG00000074582
TAGTGTGGCAGATGTTTATTGAGCTAGAGGAGGAGAGCTGAGCTGAGCCCAGCCTGA
>ENSG00000074582
TAGTGTGGCAGATGTTTATTGAGCTAGAGGAGGAGAGCTGAGCTGAGCCCAGCCTGA
>ENSG00000074582
TAGTGTGGCAGATGTTTATTGAGCTAGAGGAGGAGAGCTGAGCTGAGCCCAGCCTGA
>ENSG00000074582
TAGTGTGGCAGATGTTTATTGAGCTAGAGGAGGAGAGCTGAGCTGAGCCCAGCCTGA
>ENSG00000102181
GGGAGCCGGGTGACAAGCGGTGGCACCATTGTGCATGCCTGCAGCTGGACAGGGCCC
>ENSG00000104825
TTGTCAGAACTAGGGTTTTGTTTATTAAACTGGAAATTATATTAACAATGAAACAAA
>ENSG00000112531
GGTCCACTTAACAGTAGTATAATTTTTAAGACTCATTCAACAGCTTAATTATTTCTA
>ENSG00000117155
CAACTTAGATGTGAAACTTGATGAACACATTAATGAAAAAAATTCCAGTCCACATGT
>ENSG00000120519
TTATACTGTCGGCCTTGTCAGCTTCACTCCCTGGAGGATGGACTCTTGGTATTTATT
>ENSG00000120963
CTAAGGTCTGAGACAGTAGAAGAGTCAAAGGTGTCATGAATTCACCTGTAAACAACC
>ENSG00000129467
TGGGCTCCAGACACCCCAGAGTCTCTTTATTGAGGTTCTTAGAAGGCGAGTGCAATC
>ENSG00000137713
AAAAGTGCAATATGTGTGGTACTTTATTTTTTATGTTCTTTTTTTAAATCTGGGGTA
>ENSG00000147687
TTTAATGAAAATAAATCTTCATCAGCAATTCACTGTAAGACAATTTAAGAAATCTGC
>ENSG00000164972
TTTGGGGTTGAAGAGTTTATTTATTGCTCTGCCCCCTTGGCACAGCAAGCCCAGGCT
>ENSG00000164972
TTTGGGGTTGAAGAGTTTATTTATTGCTCTGCCCCCTTGGCACAGCAAGCCCAGGCT
>ENSG00000164972
TTTGGGGTTGAAGAGTTTATTTATTGCTCTGCCCCCTTGGCACAGCAAGCCCAGGCT
>ENSG00000164972
TTTGGGGTTGAAGAGTTTATTTATTGCTCTGCCCCCTTGGCACAGCAAGCCCAGGCT
>ENSG00000186471
CTGCTGAGAGTCTCTTTATTGTTCTTCACACCGGTGTACCATGCTGGAGTGGTCGGC
>ENSG00000029153
TTTTTCGTAAATGAAATGCTTTAAAATGTTTCTCATTTTTGGAGTTAAAAATCAAAGG
>ENSG00000029153
TTTTTCGTAAATGAAATGCTTTAAAATGTTTCTCATTTTTGGAGTTAAAAATCAAAGG
>ENSG00000090924
CCATTCGCCGATGCAGATACCAGGAGTTGGAAGGCCGCAGCAGTTTTGAGGCCTGCGT
>ENSG00000096093
TGTATTTCAAAGCATAGTTCCAGTATCAAAAATTGTCTTGCATTTTCTCATCAGCAGG
>ENSG00000100316
TGTCAGTGGAAAATAACTTTTATTGAGACCCCACCAACTGCAAAATCTGTTCCTGGCA
>ENSG00000100316
TGTCAGTGGAAAATAACTTTTATTGAGACCCCACCAACTGCAAAATCTGTTCCTGGCA
>ENSG00000101255
TTGGAGCTACCCCCAAACTCAATCCACTGTTGGCAGCTGAGCGTGTAGTAGGGTGGTC
>ENSG00000103363
TGGGTCTGTAGACTGTTTATTAAAGGTGTGTTAAGGGGGCAGCCACTTCCCTCCGTGA
>ENSG00000104408
GTTTTATTATTTCATCTTTCTTTGATAGTTTTTTTTTTCATCTTTTCTTTATGGTTCT
>ENSG00000104408
GTTTTATTATTTCATCTTTCTTTGATAGTTTTTTTTTTCATCTTTTCTTTATGGTTCT
>ENSG00000105251
GAGGGCTTTGGGATACGATTCTGGGCCCGAGGACTCAAAAGGGGGCCGAGGGTCACTG
>ENSG00000109332
ACAGTAATTTAAAGTTTATTCCAGCTATAATGCAGGTTATTCTGACTTTAAGGTAGCA
>ENSG00000112146
TCTTTTGCGCTATATACTTTAATTCATGCAAAAGTGATAGAGGACTGGACTTGAGGCT
>ENSG00000125652
TTAGGCTGTCCATTCCCCAACTTTATTCACAAATCTGGTGTCTGTAGAAAGCTGGGGG
>ENSG00000138119
TGTTTCACAATATCCAATGTTTATTTTATGTTGAATTAGACACATACGTATTTTCAAC
>ENSG00000141401
CCCCAGGAGCCCACAGCAGCCCAGGGAGGCCTTGGGAGCAGCTTTGCCTCAGCCGCAG
>ENSG00000141562
TCTACTGAGAGGCTCTTGGCTCTGGCCCCAAGAGCAGCTGGAAGGCCCTGGCCTGACT
>ENSG00000148926
CCGGCGGCCGTAGCCCTGGGGGCTGATCTTGCTCCTGGGGGCGACGTTGTCCTTGTCC
>ENSG00000152582
TCACATTTAATTTTTGGAAGATTTATTGCAGAATTAAAAAAATCACACTCTTTTGTCT
>ENSG00000153789
GCCTCCAGGCAGTCTGGGATTATTTTAAACGGCTTGGGATTGCACTTACCCTACGTCG
>ENSG00000154240
GCTGGAAGAAGTCCACAGCACAGCCTGGAAATTGCATCCGTTGCATTCTCTCGTGCAG
>ENSG00000159692
GGTCCGAGGGTTTCCGGGCCCTCTGCCCAGGCGCCGAGGCTGGAGAGCTCCTCCCGGG
>ENSG00000163322
GCCTTTTATATAAATTTTATTTATTTTCTGGAGGATGTCAGTAACAAGCACTTGTAGG
>ENSG00000171201
GTCTTGGTCGGGAAGGAGGCTGTGGATAACCTGGGGCATCAGGATGGAGTGGTGGACC
>ENSG00000172053
CTCCAGGAGGATGAGGTAGGTTCAGTGCTTCCAGCTCACACCTTTCCTGGGTCTTCCT
>ENSG00000182858
GGTGCTGAGAGCCCCAGCTGAGGCTGTGGAGGAGGCCCTGGACCTGGTCTGGTGTCTG
>ENSG00000198625
GAGTCCTCCAGGTCATCATTTTTTCCCACTTCAATCACCTTCTCTAGAATGTATGCAT
>ENSG00000214530
GCGGCCGCCGCCCCAGGGCTCGCCCGGTCCTGTCTCCGTCCCTGAAGCGGTGCGGCGC
>ENSG00000221866
TTTCTGTGCTATGAATATTTATTTTTAGTTAAAGTGGATTCAAATTTCCAGAGTAATT
>ENSG00000277791
TGAAAGACAGGCTATTTTATTTCAAAAAAAGAAAAAAAAGTGGGCTCTGGGAACAGGG
>ENSG00000278677
TGGGTGGCTCTGAAAAGAGCCTTTTGTCTTGTAAGTTTACATTTTTAAAGTTCAGCCC
>ENSG00000075790
ACCGGTTAATGAATTTTTTCCTTTTATTGGTAAACAGCCACCATATACCAATGACATTA
>ENSG00000100722
TTTCATCAGTACATGAAAACTTCCAAACTGCATGATCTTCTGCCAGGCAGGACTGGGTG
>ENSG00000104825
GGTTGTCAGAACTAGGGTTTTGTTTATTAAACTGGAAATTATATTAACAATGAAACAAA
>ENSG00000112200
TAGGACATTTATCATCTTTATTCACTTAAAAGCTGAAGAGTAAACTCTTCTCAGATCTG
>ENSG00000114013
AGGAACTTACAAAGGAAAGGGTAGAAAAAATGAATACTTGTATGGGCTTTACTCTTTAA
>ENSG00000126215
GGCCCGAGCCCCGTGTGTCGGGGCTTCTCAGGCAGGGCTGTTGTGCAGCCGCCACCGTG
>ENSG00000138443
TTCAGATAATCTGGGAAGACCTGACTATTCCTGTGAGGCAAGCACAGCCCTGCTGAGCT
>ENSG00000144040
TCACAACCCCTTGTTGTACACCACTGTCCGGCTGCTCGTGGCCTGGGCTATCTCCGGCT
>ENSG00000151292
AATCACAAGACAGCAGATGAACATGTAAGTAACTCCCCAGGATCTGTCTGTGTCCAGAG
>ENSG00000167858
TACTGTTTACAATGTGGTTTAATGAGAATTGGAACTAGCCCTACTATTAGCAGACAGCA
>ENSG00000168214
TTTTTTGTTAACTTTTTGCCACACTCAAGTCAGTTTAAGTCCTAGCAAAAAGACGGTAG
>ENSG00000186074
GTCGATGAGGCAGGAGTGTGCTCACAGCCTGGGGTCCAAGAAGGAGCCTGGAGTGCAGG
>ENSG00000197530
TTTATAAAACACAGGGCGGGGGCACGCGAAGGCAGCTCGGGCGCGGCGGACGGCGCGGC
>ENSG00000043093
TGCAATTTTCTGTTGTATTTATTGTACAGACTATGTACATTCTAGAAGGTTCCTTTAGTG
>ENSG00000118200
GGCAGGAAAGATGAAGTGCAAATTTACCATGAATGTTCTGAAGCAAGTATTTCCCAACTT
>ENSG00000134744
TAATCCTGTGAGGTAAATAGGTTTTATTCTAGTTTTACTGATGATATATTTGAAAGTTGA
>ENSG00000139625
TATGTATATATATATAATTTATATAAATATTTCTCTATGTACAAGGAATACGAGTGGCTT
>ENSG00000143437
GCTTTTTAAAAACAAACAGTGATTTTTTCTCCCCCACCCCTTATCCTCACCCCAATAGTT
>ENSG00000149743
TGGTTTCAAACGAGTTCTTTCTTGTTACTTTTTAAAATTTCTTTTTTATAAATTAATATT
>ENSG00000159692
CTGGTCCGAGGGTTTCCGGGCCCTCTGCCCAGGCGCCGAGGCTGGAGAGCTCCTCCCGGG
>ENSG00000162643
TTAAGCCAAACAAATATATTTCCACTGGTGTTCGAGGAAAACATCTTTCATTTCTGAAAT
>ENSG00000178814
TAGGCGCCGTAGCTGCGTCCCCAGAACCGGGAGACTTAAGGCATCTTTATTGCGGGATCC
>ENSG00000182154
TAGCTGGCAAAGGCGTTTAATAGAAATGAGATGAGGGCAGGCCGCCCCTCCCCCGCCCAG
>ENSG00000197249
TTAATGTCATCCAGGGAGGGGGCCAGGGATGGAGGGGAGGGGTTGAGGAGCGAGAGGCAG
>ENSG00000275379
TGAGGGGCTCTGAAAAGAGCCTTTTGGGGTTGGACAGACTTCTTGGGCTGATAGGAATAT
>ENSG00000278637
TGGGCGGCCCTGAAAAGGGCCTTTGGTTCAGAAATGCAAGCTGTGGAGAAATCAGCAACC
>ENSG00000071073
CATGCTTAACTATCTTTAATTAACAAATTCACAGGAAAAAATGTGTTGGTTTCTCAGATGA
>ENSG00000075539
TTTACTGAAAATATATATTTATTAACATTAATGTAATTAACAATACACCTCACCCTTATAG
>ENSG00000076924
TGATGTACAAACGTAGCTGTATTGGGGAGGGGGTGGGGAGGGGGGATGGGGGAGGGACGGG
>ENSG00000083535
TCCATCAGAAAAAGAACTTCAGGAGTATATAATGGTCTACAGGTGCTTCCCATCCAAAACA
>ENSG00000103197
TTATTTATTTCACTGACAGGCAATACCGTCCAAGGCCAGTGCAGGAGGGAGGGCCCCGGCC
>ENSG00000110719
TCTTTATTCCTCTCCTGCCTCAGAGGTCAGGAAGGAGGTCTGGCAGGACCTGCAGTGGGCC
>ENSG00000117298
GGATGGGGGTCTCGTCCTCAGCCCCTTCCCCTCCTCCGTCTTGGCTCTCTCCGCTTCGTCC
>ENSG00000126759
CGAAGAGGCTAGTTTATTGAGGTTTGGAAGGTCAGGGGGCTCAGAGTGGAGGAGAGAAGTG
>ENSG00000145901
CTGGCCACCCATCTCAGCCTCTCATCCAGCTGAGGCTCTGGCCACACCGTGCAAGTGGCTT
>ENSG00000152944
AACTGATAGTGGTGCCCCTAGAACTGTAGTCCCAGTTACTGAAGAGGCTGAAGTGGGAGGA
>ENSG00000160345
ATGTTGTAACTGGGGTGGAAGTTGAGCCGGTCACAGGAGGTGATGCAGTTATCGGGGCCAG
>ENSG00000161013
GGGCGGGGCCGTATCTGGCCCTCCGGGGACGGCAGTGACGACACCCCCAGAAATGTGGGCT
>ENSG00000178031
CCGAGGTGGTTGCGTGAGTCCTTCGTGTGGCCAGGGTAGAGTTTTTCCCCACACCCTATCT
>ENSG00000181218
TAGGTGGCTCTGAAAAGAGCCTTTATGTCCATCAAAGGGGCCCCGGGGGCGGCGGGCGGCC
>ENSG00000010626
CTAGGCACCCCATTCTGCACCCCACACTGCCCAGAGGACCGGCACAGAGCAGATCCTGGGCC
>ENSG00000076944
GGCAGAGCGACGGGAAGAGTTTATTTCTCTGGAAAGGGAGGGGTAGGGGGCGGGGCCAGGGG
>ENSG00000100416
TCCATCTCTGTCAGAGCAAGGGACTCAGGCCTGGACCATCTTCTGGGCTGTCACTGGGGCTC
>ENSG00000102780
GCTTCCAAGGACTTTGTATTAAGTGGCAATAACTTCTCTTCCAAGAAATAGCACCAATATGA
>ENSG00000104549
ATTCATCAACTGAACAGTCCTAAGAAAATCTGGCAGGTTTGTATCCTCTGTGCCATCACAAC
>ENSG00000117620
TTACAAAGAATTCTAATTTTTCTATATACTTCTGGGGATTTAAAAAAATAGAAAAGAACATT
>ENSG00000130479
TGATGTGGCTGAATCTAGGGACAGGCGGGCTGGGCTGAGTGGGGGGCGTGTCGGCGATGGGG
>ENSG00000137691
TCAAGGTTAAGCAAATAATTTATTCTATTAACTAGAGATTTACATATTGTGATCTAGCAACA
>ENSG00000140464
GTCTCCCTGCCCAGAGGTCCATGCATAGCCATTCATTCGTTGATTCATTCCTTAACCAAGAA
>ENSG00000150556
TTAAGTTACTAAATACGTTTATTCAGTTACTCAACCAATATTTACGGGGCACCTACAATGTG
>ENSG00000156469
TATATTCATTTATTCATATATATATTCACTTTACAATACTGCATTTTAACATACATAAAAAT
>ENSG00000158406
TGGGCGGCCCTGAAAAGGGCCTTTGGTTGAAAATGAAAATAAGAGTGCAGCAAGCAGGAGCC
>ENSG00000159692
CTCTGGTCCGAGGGTTTCCGGGCCCTCTGCCCAGGCGCCGAGGCTGGAGAGCTCCTCCCGGG
>ENSG00000170525
GGAGGCCAAATGAGCAAGCAGGAAGAAAGCAGTGCAAGCAGCAGCGATGATCGGAGAGATAC
>ENSG00000176108
CAGTTCTGATTTCTGAATGTGTCTCTTTGAATGGGGTATGGCTCTCTTATGAGGTTGCCCAG
>ENSG00000021300
GGTCCAGGAGGAAGAGGAGTCTAGCAATCCAAGCGCAGGGGTCAGTGCTCCGAGTCCCAGGGC
>ENSG00000048052
TAAATGTTTCTTTGTACTATAATTTTCAATATAATTTTAGTTAGTTTTACCTGCTTAGAATTT
>ENSG00000076944
TGGCAGAGCGACGGGAAGAGTTTATTTCTCTGGAAAGGGAGGGGTAGGGGGCGGGGCCAGGGG
>ENSG00000076944
TGGCAGAGCGACGGGAAGAGTTTATTTCTCTGGAAAGGGAGGGGTAGGGGGCGGGGCCAGGGG
>ENSG00000079277
TCTGGCTCCTCTGCTAGTTCGTTCTCTTCGTGCTGAGATAGCTGGCGGTTAAGGGCGATGGCC
>ENSG00000087074
CTTATATAAACCCACACTTAGAAAAAATAAATAGTTAATAAATTATAGGCAAACCAGTTGGTC
>ENSG00000100852
TGAAACATGCATGTCTAGATTTGCTTTTTGTCCAAATCCAGCCTGTTTGCAATCACTTCCTAC
>ENSG00000103549
TGCATCCTTCTTGCGGGTGTTACAGCAGGGGCAGGTCAACCGCGCCTGGGCCAGGCAAAGGCA
>ENSG00000104529
CAGAGGGCCGGTCTCAGTCTTTAATCGTGGCAGGGCCTCACGCACGCGCGCACGTACACACAC
>ENSG00000104529
CCGGTCTCAGTCTTTAATCGTGGCAGGGCCTCACGCACGCGCGCACGTACACACACTCAGGCT
>ENSG00000114209
ACAGTACTTACTTGCCATCTTTAAAATACGTTTTCAGAGTATCACTGAAACTTTTGGAGTACT
>ENSG00000138674
TTTTTTTTTTTAACATGTTTCTTTGGAAAAATGGCAATATTGAGTGGAAGAGAAGCTGTCCTT
>ENSG00000138674
TTTTTTTTTTTAACATGTTTCTTTGGAAAAATGGCAATATTGAGTGGAAGAGAAGCTGTCCTT
>ENSG00000140464
TCCTGGGCTGAACTTCTGGGCCACTCACCGAGTTTTCGGCATCTGAGTCTTCCGAGCTGCTGA
>ENSG00000140983
GAATCAAAGCAAGTTGTCTTCAGAGACTGGGATCCGAGATAGAAAACACACAGTGAAGTTTAA
>ENSG00000141068
TGGGATGTTTCAGAAACACATTTTAAAAAGAAAGAGATCAGCAGCGAAAAACCATATGGCTGG
>ENSG00000141994
TTTTAAAAGAATAAAATTTATTGTACTCTCCTCGCCCCAGGGTGCCCCTGGGAAAGCCTGAGG
>ENSG00000141994
TTTTAAAAGAATAAAATTTATTGTACTCTCCTCGCCCCAGGGTGCCCCTGGGAAAGCCTGAGG
>ENSG00000147274
TTTCTTACTGCCAGCTTTATCTACTGTGAATCAATCAGCACTCCACGACCATAATGAGCAAAA
>ENSG00000164924
ATGGATGACAAATGGTCTACTGTGTAAATTTTAGAATGAGGCAGACAAAAGTTGGAAGGCCGG
>ENSG00000169756
GCCTAAATGCGGCAGCAGGAGCTCAGGAAGCGGTCATGCTGCTTAATGAAGGTAGCTTAACCA
>ENSG00000171302
GCACTCCTCTTGTTTTTATAAAAGCTGAGTCCTGATGGCCTTGCTCAGTGTTTCCGTTTTGAG
>ENSG00000175182
GCACAGAGGCTCTGCCCCTGGCAGCAGCCGGGGGATGCATGCCACTGCCAGGCATGATGTGGG
>ENSG00000178028
CAGCCTGGTCCAACTCAGCAGCTCTATTTACATAACAGCGTCGCCCACACCCCGTGGGGCCTC
>ENSG00000178028
CAGCCTGGTCCAACTCAGCAGCTCTATTTACATAACAGCGTCGCCCACACCCCGTGGGGCCTC
>ENSG00000187037
CTCCCCTATACCCATTTTTATTCCCAATATAAAGGAAGCAAATATGAATACTGTAGTTTGTGG
>ENSG00000198556
TACGCCCCGCGCAGTTTACAAAGTTGATGGGCAGGCAGGAGAAGAGTTACTGTTGCCACTGTT
>ENSG00000198855
GCCCTTTATGCTTCCCCATCACCACACTTGTGACACTGTCTCAGTCACATCACCTTGTCTATA
>ENSG00000250305
TGAGGTCTCAGAGAAAGCTGAGAGAGGGGACTTGGACCTAAGGGCCTGAGAGGAAAGGTTGTC
>ENSG00000094755
AGCAGCTGATCATGTTTTTTTCATATTGGATTCTTCATGGATGCTTGCTCCTGTGGTTGTGATT
>ENSG00000099326
CAGGAGTGGGGTCGGCAGAGATGGTGCTGTCCATGCGGAAGGCCTAGTCCCACCACACCCCATC
>ENSG00000101199
CGACGAGGGCAGAGTGCAAACACGAAGTCGCCCGGGGGCGCTGGGGACGGGGGCGCAGTGGGCC
>ENSG00000104529
GCCGGTCTCAGTCTTTAATCGTGGCAGGGCCTCACGCACGCGCGCACGTACACACACTCAGGCT
>ENSG00000104529
GCCGGTCTCAGTCTTTAATCGTGGCAGGGCCTCACGCACGCGCGCACGTACACACACTCAGGCT
>ENSG00000104529
GCCGGTCTCAGTCTTTAATCGTGGCAGGGCCTCACGCACGCGCGCACGTACACACACTCAGGCT
>ENSG00000104529
GCCGGTCTCAGTCTTTAATCGTGGCAGGGCCTCACGCACGCGCGCACGTACACACACTCAGGCT
>ENSG00000104529
GCCGGTCTCAGTCTTTAATCGTGGCAGGGCCTCACGCACGCGCGCACGTACACACACTCAGGCT
>ENSG00000104529
GCCGGTCTCAGTCTTTAATCGTGGCAGGGCCTCACGCACGCGCGCACGTACACACACTCAGGCT
>ENSG00000104529
GCCGGTCTCAGTCTTTAATCGTGGCAGGGCCTCACGCACGCGCGCACGTACACACACTCAGGCT
>ENSG00000104529
GCCGGTCTCAGTCTTTAATCGTGGCAGGGCCTCACGCACGCGCGCACGTACACACACTCAGGCT
>ENSG00000105701
GGGGAGTTGGGGAGCGCAGGGCAGGGTCCATGGTGTGCAGAGGGGGTGGCAGCCACCTAGGTGG
>ENSG00000109065
GTCTTTGAAGTGTATGGGCCCAACACCCTGCTCACACAGAGTGGCTGCCCACAAGGCCCAGCCA
>ENSG00000116678
CATTGTGCACACCTCAGGGAGAGCAGGTGCGGCAGCGAGGTAGGACGTAGTCTACAAGCATTTC
>ENSG00000116678
CATTGTGCACACCTCAGGGAGAGCAGGTGCGGCAGCGAGGTAGGACGTAGTCTACAAGCATTTC
>ENSG00000120913
CCATGCCAACTTATATAGGCATGACCCTGGCCCAGCAGTGAGGCAGGCTGAGGGCATGGCGGGC
>ENSG00000124429
TTTTTAGTTCATTTGATATTTTACCTCAATTTTAAAAGGCTGTACATATATCGTCAAAATAGGG
>ENSG00000162129
GCCATGCCACAGCCAAGGGGCCTTTATTGGATGGTGAGGGCACATAGGAGCAGGCAGGTGGCTG
>ENSG00000162129
GCCATGCCACAGCCAAGGGGCCTTTATTGGATGGTGAGGGCACATAGGAGCAGGCAGGTGGCTG
>ENSG00000164022
ACAAATATATTTCTCTTTATTACTTTTAAGGTTTTCTCTAATGTCTTTTGGTAGTGGAAGCATT
>ENSG00000173744
CAAGAGGTGGAGAGATGTAATGTGACCACATAAAAGTTCGTTCCAGTAAATTGTCTATATAAGG
>ENSG00000173818
AGCTCAACAGGCTGGTATTTCTGGCGGCGGTGGACTGGCTCATTGAGTGGGTCTAAGGTCCCCA
>ENSG00000173992
CCCCCTCTGGAAGTGGAAAGTGCTCGCCCTGGAGGACAGCAACAGAGCCAAGGTGAGGTCCTGC
>ENSG00000179335
GACATCTGGCTCTTCTGGTGTTCCCCAATTACATTCATAGCCACCCTATGGGGAAGGGGTAGGG
>ENSG00000184939
ATGTGATGATTTGACTTCAGGCCTGGTCTTCCAGTCTGAAAGAAATCCAAAGTACAAAAGTCCC
>ENSG00000187391
TGAATTCAAAAACAAAGTTTCCTTTAATTCATGTTTTTCTCTCTCACTCTTTAAGCTTTATTTT
>ENSG00000188738
TATGCTTTAAAAACCATTTTATTTTCTAAAAGAAGTAAGCATACTTATATCAGGTACAAAAGCT
>ENSG00000204351
GTCCAGCAACTCAAGCACACAACAGTGCTTTGCTGTTTTATCATCATGTTTTTACATGGGGCAT
>ENSG00000263020
TGTTTTCAGAGAGGGCAGTGCAGGATGCTGAGGGTGTTACAGAAAGATATTTGCACTGTGGAAT
>ENSG00000100429
GCGGCCGCGGGGCGCTGGCGTGCGGTGTCATTTCTGCGGTGTAAATGCTCCCACCTTGGCCGATT
>ENSG00000103152
CTAGAAATAAAACATTTATTCGGTTTTTAAACAATTAAAAAATCTTGTCTGGGCAGGCCCTTTGC
>ENSG00000105404
GCAGGACAGGCATGGGCAGGGGTGGGGCAGCTGGCCCGGGAGGCCGGCAGGTCCCAGAAGACACC
>ENSG00000108219
GCTGATGGCAGAGAAAGGCTCTGGCCTCCCAGCGTGGCTCAGCTCGGCTCCCTCAACTCTGCTCC
>ENSG00000116337
GGCGGGGTCTGAGGACAAAACGTGGTAAAAGTGCTGCGATGTGGTGGGCACTTCATGGACCAGGC
>ENSG00000126246
TCAAGAAGTACTTCAGTGCTAATTGTATACTGGGCTTAGTAGTCAGCAAAGTTCTTTATTGGGTG
>ENSG00000158773
GGGATTAGGCTGTTGCTCCTGGGCTATCTGCAGTTCTTGGGCCCAAAGCCCCTGAATCCCCATAG
>ENSG00000160013
TGCCACTACGTCCGGCTACTTTTTATTTATTTATTTGTTGTATTTTTAGTAGAGACAGGGTTTCA
>ENSG00000165915
GGAGGGGCAAGAAGCAGAGACTCCAGACACAGGTGGAATCCACATGGCTGCCACTGGAATCGCCA
>ENSG00000196747
TAGGTGGCTCTGAAAAGAGCCTTTGGTTCCTTTGGGATTGAGTTGCTGCAAACTAATCCAGGCTT
>ENSG00000197694
AGGAGCGGACATGCAGCAAGGCGACGCAGGGCAAGCAGCGAGGGGTGGGTGACCCAGGGAGTGGC
>ENSG00000204351
TGTCCAGCAACTCAAGCACACAACAGTGCTTTGCTGTTTTATCATCATGTTTTTACATGGGGCAT
>ENSG00000221838
TGAAAGACTTAGGTCCCTGTCAATCATCCTTTCAGACCCCTTCATCTTAGTTTATTTCCTTCCCC
>ENSG00000232629
CTGGGCAGGGGCAGGTGGGCATTACAGAAGAGTGATGACCAATCCCAGACAAAAGTCCTCAGGAG
>ENSG00000096093
GTGTAAGGTGTATTTCAAAGCATAGTTCCAGTATCAAAAATTGTCTTGCATTTTCTCATCAGCAGG
>ENSG00000096093
GTGTAAGGTGTATTTCAAAGCATAGTTCCAGTATCAAAAATTGTCTTGCATTTTCTCATCAGCAGG
>ENSG00000101557
GGATTATAGAAATGATCAACAAATAACATTTATTTTCACATCTAAGCATAAATACTAAAATGAAGA
>ENSG00000113387
AGCCAATGTAAAAAGACAGATTAAAACAACTAGAACAGTACAGGTTTTATTTATATGGCTCGAATT
>ENSG00000114209
AAAATTTACAGATAAAGGCAGTTCAATACTGCCACTGAGAAGTACATCTCTTAACATATACAACTT
>ENSG00000123415
TTTTACAGATGAGGAGCCTGAGGCATAGAGAGGTTTATTAATTTGTCAATCAAAAAGTTCCAAGTT
>ENSG00000123415
TTTTACAGATGAGGAGCCTGAGGCATAGAGAGGTTTATTAATTTGTCAATCAAAAAGTTCCAAGTT
>ENSG00000126759
CTGGGGTAGCCGACTCTCCCGCCTGTAATATAATGACCCCCTCCCAGGCATACTTTGCCCTCTCAC
>ENSG00000126883
TTCTGTACGGAAACAGACTGTTTAATAGTGGGAGGGAAAACCCAACATGAAATATAAAACAAGTAA
>ENSG00000135931
ATACATCTTACACTGTAATCAAAACAAAGCTTAAGAAAGTCAATTCCCGCTTCCTTTAGCCCTGAC
>ENSG00000169682
AGGGCTGTGGACTGAGCTGCCAGGTGCACAGGAGTGGGCAGACAGATGGACAGACAGACAGGCAGA
>ENSG00000056586
ACAAAAACAAATTTATCTTTAATTATATCAAGATTTGTACATATAAAGACGGGTTGAGTCTCAGGAT
>ENSG00000062822
TAGCAAAAGTCCAGAACTTTATTAATTCTCCCTGGTCCCGCCCCCGCCCCATGGGATGCTTGCAAGG
>ENSG00000062822
TAGCAAAAGTCCAGAACTTTATTAATTCTCCCTGGTCCCGCCCCCGCCCCATGGGATGCTTGCAAGG
>ENSG00000108387
TGCTGGGAGGGGCCGGCATGGACAGGAAGAAGAGGAGGAGATTTAAATATCCAGGGCTGAAAGCCAG
>ENSG00000108387
TGCTGGGAGGGGCCGGCATGGACAGGAAGAAGAGGAGGAGATTTAAATATCCAGGGCTGAAAGCCAG
>ENSG00000110344
AGAGAAACCACAAACAATTGTTTATCTGCACTCTGGGGTTGGTTTTGGTTTGGTTAGTTCACAGTAT
>ENSG00000124343
CAACAGTGATAAACACGGTTCTTGTTTTAGTTGTTTTTCTCAAAGTAATCAGGGGATCTTAACATCT
>ENSG00000124343
CAACAGTGATAAACACGGTTCTTGTTTTAGTTGTTTTTCTCAAAGTAATCAGGGGATCTTAACATCT
>ENSG00000125458
CCGCGGCATCCCCGCTCATTCCCGCTGCGCAGCTCCGCGCTTGCTATCTAAGATCTCCCTCCAGTTG
>ENSG00000129467
CAGACATCAATGGGCTCCAGACACCCCAGAGTCTCTTTATTGAGGTTCTTAGAAGGCGAGTGCAATC
>ENSG00000156469
AAAAATATATTCATTTATTCATATATATATTCACTTTACAATACTGCATTTTAACATACATAAAAAT
>ENSG00000161618
AGGTGTCTGTGGGGTGCATCTCCCCTTGGTGTGAGGTGTCCAAAATGCAGTAGGTGGCGCTCAGGCA
>ENSG00000163960
CTTAGTGACATGTATCTCACAGGAAAAGGGAAAAAAGGGGTAAGCTGAGAGAGGTCAAGCCATGGTG
>ENSG00000178927
CTCAGGCACACCGGGAATGTGCCATGGGTCCTGTGGGCGGTGCACGGGCTCAGGCACAGTGGGGCTG
>ENSG00000183401
TAGAGGAGGGTCTGGGCTAGTTTATTTTCTCTCTGGAGGGGTCTTCAGGGAGAGCAGTCCCGGCTGC
>ENSG00000183401
TAGAGGAGGGTCTGGGCTAGTTTATTTTCTCTCTGGAGGGGTCTTCAGGGAGAGCAGTCCCGGCTGC
>ENSG00000196866
TGGGTGGCTCTGAAAAGAGCCTTTGTTAAGACTGCTTCCTTAAAAAGCCAATATAAGAGTTCTCGTT
>ENSG00000205133
GAAAGTTTTGGTCCCAAAAGGTGCTTTCGTAAAGTTATTTCTCTTTCATGCATTGATTGTTGCTTAG
>ENSG00000275221
TAGGTGGCTCTGAAAAGAACCTTTTTGGTTTGGACCGAGGTATGAGTAATGAACTGCTCCAGCCCCG
>ENSG00000063245
ATTTGTGAACTTATTTTTTATATTTTCCTGATGCTGAGAACATTTAGAAGTTATAAAGAGACAGAGAT
>ENSG00000066777
GTAGGCTTTCTGCATCTCTTCTATTGATTTCATTCCCAGGCATCCTCCTTTCACTGGCAGCCCCATGC
>ENSG00000103426
TGCAGAAAAGAAATTTATTACCAAGCTATAAATTAGAGGCGGCGGGGTGGGCGGGGGGAGCCGAGCAG
>ENSG00000112782
TTTAAACTCTTAGGTTTTTTTTTCTGCCTCAAAGCCAGTACAGACAATGAGTTCCACATTTAGAAATT
>ENSG00000152942
TGCTGAAGTACCACTGAATGAAACAAAAATGAAGCTGTGAAGTAGCAATCTGATTAGCAGGCTGGCTT
>ENSG00000152942
TGCTGAAGTACCACTGAATGAAACAAAAATGAAGCTGTGAAGTAGCAATCTGATTAGCAGGCTGGCTT
>ENSG00000161249
GGCCAAGGGGAGGAGCTCCCTGACGACCAGTGCTTTTCGGGGCCTCGGTGGTGGTTGCAAGAAATTGC
>ENSG00000175792
GCGCCCACAGGCTGGACCCAGGCCAGGCACACCTGGGGAGTCTCTTACTGCTGAAAACCTCAGCCATC
>ENSG00000196705
CTCTGGCCAAAGGTCTTTGGTAAAATAAGAACACATAGCTTGGTTTTTACTGTGGTCCCTGAAGCAGT
>ENSG00000204859
TACGAGAGTCCAAAGCCACACGGTTTATTGAGGGGTGGGGCCAAGTGGGCTCTGGTGGCCAGAATGGG
>ENSG00000217930
TGCAGAAAAGAAATTTATTACCAAGCTATAAATTAGAGGCGGCGGGGTGGGCGGGGGGAGCCGAGCAG
>ENSG00000217930
TGCAGAAAAGAAATTTATTACCAAGCTATAAATTAGAGGCGGCGGGGTGGGCGGGGGGAGCCGAGCAG
>ENSG00000217930
TGCAGAAAAGAAATTTATTACCAAGCTATAAATTAGAGGCGGCGGGGTGGGCGGGGGGAGCCGAGCAG
>ENSG00000217930
TGCAGAAAAGAAATTTATTACCAAGCTATAAATTAGAGGCGGCGGGGTGGGCGGGGGGAGCCGAGCAG
>ENSG00000217930
TGCAGAAAAGAAATTTATTACCAAGCTATAAATTAGAGGCGGCGGGGTGGGCGGGGGGAGCCGAGCAG
>ENSG00000013288
TGTCCTGGGTCTGTTCTGTTACATGGAGTTCCTGGGGGAAGCCCTGGGGCCGGGGCATCTGCCCAGGGC
>ENSG00000088298
TATGATAGCCAAAAGCAATTTATTATAGTTTAGCCTCAAAAAAATAAAAATAAAAAAATTATCCAGTGG
>ENSG00000088298
TATGATAGCCAAAAGCAATTTATTATAGTTTAGCCTCAAAAAAATAAAAATAAAAAAATTATCCAGTGG
>ENSG00000103152
TTTTCTAGAAATAAAACATTTATTCGGTTTTTAAACAATTAAAAAATCTTGTCTGGGCAGGCCCTTTGC
>ENSG00000126456
AGGAACCAGTTTATTGGTTGAGGTGGTGGGGAACAGGGGGGTTGGAGGCACACCATGAGGAGCGAGGGC
>ENSG00000126456
AGGAACCAGTTTATTGGTTGAGGTGGTGGGGAACAGGGGGGTTGGAGGCACACCATGAGGAGCGAGGGC
>ENSG00000126456
AGGAACCAGTTTATTGGTTGAGGTGGTGGGGAACAGGGGGGTTGGAGGCACACCATGAGGAGCGAGGGC
>ENSG00000126456
AGGAACCAGTTTATTGGTTGAGGTGGTGGGGAACAGGGGGGTTGGAGGCACACCATGAGGAGCGAGGGC
>ENSG00000126456
AGGAACCAGTTTATTGGTTGAGGTGGTGGGGAACAGGGGGGTTGGAGGCACACCATGAGGAGCGAGGGC
>ENSG00000136051
TCCATTCCACTGGCAAAAGTTTTAACAATTCTGATGATTTCATCATATGTGCAGTGAATACCATCCGTA
>ENSG00000139343
TCAAGTTGAAAAACAAACAAATCTTTATTGTCTAGAAATATATATAAAAAAAATCCCCCACAAAAGATG
>ENSG00000144445
CACATATAATGATGTTTATTTGAATAGTTTACAAAATCAATGAAAAGTCATTTCATACCACTGATATCC
>ENSG00000146282
GAACAGCAAGGCATCTCAGAATAGATAACTAGAATTCACTTGACATTTTAAAAGCCATTTTAATGGAAA
>ENSG00000146282
GAACAGCAAGGCATCTCAGAATAGATAACTAGAATTCACTTGACATTTTAAAAGCCATTTTAATGGAAA
>ENSG00000169139
GATATTTAATCAAGACATTAACATGAGTAGAAGGTTGTTGATTTAAGACAAGTTTGAGATCCACTAAAA
>ENSG00000075213
TTGCATTTGTTTTTCCAGTTATTGTCTAGGCAAGTTTCTACTTGTTTGAGGTTTCTAGAGGTAATGCAGC
>ENSG00000091181
AATCTGCTATCCCTGCTGTTGTTTTTATTTCAGATACGGTGTGGGGCAGGAAAGCTGGATGTTATCTCCT
>ENSG00000100749
TAAGAAATATATAAATATTTATTTTTCTACAACCCTCTACACATTTTCTGTATTACAAAAAATGTTTGCC
>ENSG00000102879
CATGTGGCTGGGAATGGGAGGTGAGTGGATGGGTGTGAATGGCTGACCCTGCTGGAGGCCCTGCGGGGCT
>ENSG00000118520
ATGCTTAAGAAAATGATTAGCTTTCTAATTATGCCATTAACTATGAGATTTATATCGGATGTTTCCACAT
>ENSG00000119335
GACTGCAACTTGCTCCCAGGGACTGGAGAAAATTTAAAAAAAGGAAGGTTGGAATCCATCAGTGTTCTAT
>ENSG00000149273
ACAAAATTTTATTAAAGGTCTTTAGAGAGCAACATCCAGACTCCAGAATACAGCTGCCAAGGAGACCCTG
>ENSG00000151748
TTGTTTGCAATTTTTTATCTGTGAAAATATTTTAAAGCTCTTACAAAACTTAAATTTTTAAAAAATCAGC
>ENSG00000156531
TTTCAGTAACATCAGCATCCTTTATTATATTACAAATAAGTCAAATATATACTTTGCTTTAACATACGAA
>ENSG00000167840
TTATGGGATCCAGTCCTAAAGTAGATTAGACCGATGTAGAATTCTGTCTGGAGACGTTCTCCCCTTCAAT
>ENSG00000173480
TCCAGTATGAACTCTCCTGTGTTTAATGAGACGGGATGTTTCAGCAAACGATTTCCCATATTCACTGCAC
>ENSG00000188452
TTTAAAGCATGGCCACATTTCTTTATATTAAAATTCTAGTTTGTACATTTCTTTTAGAAACAATTACATG
>ENSG00000196588
GAAAGTGAACAGAGCAAGGCCTCTGTTATTATTTATTGTTGTATGTCCCTGTTTCTTAAAGCAACAGGCA
>ENSG00000261857
TTTGCACTGGGCTGATTGTATTTGCATAAAGCCAAGGAGGGGAAACGGCAGGGCCAGCGGTAGGCTGAGC
>ENSG00000261857
TTTGCACTGGGCTGATTGTATTTGCATAAAGCCAAGGAGGGGAAACGGCAGGGCCAGCGGTAGGCTGAGC
>ENSG00000054654
AGACAGGGTCTCTCTATGTTGTCCAGTCTGGTCTCAAACTCCTGGCCTCAAACAGTCCTCCAATCTCAGCC
>ENSG00000062822
CATATAGCAAAAGTCCAGAACTTTATTAATTCTCCCTGGTCCCGCCCCCGCCCCATGGGATGCTTGCAAGG
>ENSG00000065243
GAGCAAATGAAGGGTTGCTATTTTTAAGAGGTCTTCTTGTGAGTCAGCTTGGTTTCGCAGTGTCTAGCAAC
>ENSG00000079332
GCACTACTGAGCTATATTCCTTAAAAAAAAATAGAGGCCAAAAAAGAACAAAATATACATTAAAATACACA
>ENSG00000100364
CATGCAAAATGTATTTTATTAGCTCCTCCCACACTGCGATTTAGTGGATGAAATACGTTAGGCGAATCACT
>ENSG00000118307
TGTGTTGCAGAAATACCTGTCTTTCACCATGCTTGGTTCTTCATACTTACAATACAGTTTGTAAGTGGAGG
>ENSG00000130307
GATGTCACTCCAGGACAGTTTATGACATGCCACAGCTGTCTGGCATGTCCAGACATGGCTGGGTAAGGGGC
>ENSG00000138802
TCACGCGCTTCTCTGACAGATTATGCTTTACCTAGGTTATAGATCTTTTTCTTATTCAATTTTATTCTACT
>ENSG00000143546
TGAGGTATTGATGACTTTATTATTCTGCAGGTACATGTCCAGGGGCCCAGCCTCTGGGCCCAGTAACTCAG
>ENSG00000143546
TGAGGTATTGATGACTTTATTATTCTGCAGGTACATGTCCAGGGGCCCAGCCTCTGGGCCCAGTAACTCAG
>ENSG00000163001
TCAGTGTAAGGACTAAATAATTTATTTTTAAGACAATTTGAACTTCCATTTTGTTAAATTGTTCTTAATTA
>ENSG00000163001
TCAGTGTAAGGACTAAATAATTTATTTTTAAGACAATTTGAACTTCCATTTTGTTAAATTGTTCTTAATTA
>ENSG00000163001
TCAGTGTAAGGACTAAATAATTTATTTTTAAGACAATTTGAACTTCCATTTTGTTAAATTGTTCTTAATTA
>ENSG00000179085
TTAGAAAATAAACTGGCTCTTTAATGGGAAATGGGAGGAAGGGCTGTCCGCACAGGAATGGGGTTAGGCTG
>ENSG00000179085
TTAGAAAATAAACTGGCTCTTTAATGGGAAATGGGAGGAAGGGCTGTCCGCACAGGAATGGGGTTAGGCTG
>ENSG00000179085
TTAGAAAATAAACTGGCTCTTTAATGGGAAATGGGAGGAAGGGCTGTCCGCACAGGAATGGGGTTAGGCTG
>ENSG00000185897
GTCCCTCCTGGCGTGAGCGAGGAAGCGCCCTGAGGATGACATGCCAGCTACACCCTCCTCCCCCGGAGGAC
>ENSG00000196141
GGCAGCGAATTGGGTCAGCACCTCGGGCAGGGAACCAAAACTGAGTGAAAACTGCTCTTTTTCCTCCTAGC
>ENSG00000071054
AGTTACAAGGAATTCCAAGTTCTCAGGATCTTGAAGACTCTGGAGGCCAGTAATCCCTGGATCACACTGCTT
>ENSG00000100364
GCATGCAAAATGTATTTTATTAGCTCCTCCCACACTGCGATTTAGTGGATGAAATACGTTAGGCGAATCACT
>ENSG00000124383
ATTTTATTATAAAACAGAACAATGACACAATATAAGCTTACACATTAATATTTACATTATATTCAAAATATA
>ENSG00000170889
TTGTAAAGCGCTGATCCTGTTTATTTGGCAGGAAAACGAGACAATCCAGCAGCCCAGGAGGGACAGGTGGAC
>ENSG00000170889
TTGTAAAGCGCTGATCCTGTTTATTTGGCAGGAAAACGAGACAATCCAGCAGCCCAGGAGGGACAGGTGGAC
>ENSG00000170889
TTGTAAAGCGCTGATCCTGTTTATTTGGCAGGAAAACGAGACAATCCAGCAGCCCAGGAGGGACAGGTGGAC
>ENSG00000204536
TGGTCTGTCCCCACCCACTTCTCCAGGATCCTCCCAGCCCCCAGGCTGGCTTTCCCTCCAACTGTCAGCTGC
>ENSG00000269858
AGCAGCCAGCACAGGCCCAGGGCTCTCCTGAAGTCATTTAAGCTGTCTGCCATGCGGCTCTGGGACTGGCCA
>ENSG00000066813
AGTAAGGCCAAGGGCCCAAAGGGAAAAGAAAGAGAAAGAAGAGGGGAATCCAAATGAATGTCTCCTAGACGCC
>ENSG00000100055
TCAGATGCTCCTTCTCGGAATCTGAGTTTTCAAGCAGCATCAAGACTTACTAAGCACTCACTGTGGACCAGTT
>ENSG00000104907
TTCCTCACAGATCTCCCCCACGGCCGCTGTGCGAGGTTGGTCTCCTGAGGCCAGGTTTTCACTCTCTTTCAGT
>ENSG00000114268
ACACTGGAGGGCCTGGAATGACCCCCTCTGCAGAGAGCAGTGCCTGCCTAGTGGTCACAGTGGATGAACATGG
>ENSG00000114268
ACACTGGAGGGCCTGGAATGACCCCCTCTGCAGAGAGCAGTGCCTGCCTAGTGGTCACAGTGGATGAACATGG
>ENSG00000120690
AGAATCAGTCAGTCTGCATATAATTGAAAATGTTCAATTAACAAACAATTATTCATAAGCTTTGGTATATTAA
>ENSG00000142507
TTCTCTGTGACAAACTTTATTAAATTTTGCATCAGTACAGGGCATCTCTTATTGCATACTAGAATCCCAGGAT
>ENSG00000146038
AGCTTTGGTAAAGATTTATTTAACAACGCTCAGAATCTTCTCACTTGACAGGGAACCTTCCCATGGATTTCAA
>ENSG00000150773
TTTAGCCAAAATGAAGGTCCTTTAATTCACATGACTTTAGCACTGAAAACCCAAAACATATGATGCTCTTCTT
>ENSG00000150773
TTTAGCCAAAATGAAGGTCCTTTAATTCACATGACTTTAGCACTGAAAACCCAAAACATATGATGCTCTTCTT
>ENSG00000155158
ACTTTAATATAAGGTTGAATCTATAGCAGATGCCGATGCTAATTGAGGAAAAATTCCATCCTTCAAGTTCTGA
>ENSG00000165092
TTCTTAGCCCGCTCAACACTCCTTCGAACAAACTCATCATAAATTGATTCTTCCACAAAAATCCTGGATGCGG
>ENSG00000169583
GCCCTTCAGATGTCAGGACACCCTCACTCCCGACAAAGATGCCTTTATTGGGCGACAGACGCGGGGTGGGGCG
>ENSG00000179902
TCTTGCACAAATCTATTTAATGGAAGTGGGCCGCAGTATGTTTCACTATAATTAGTTCAGGGATCTGTCAACA
>ENSG00000197249
GCTCAACCCTTCTTTAATGTCATCCAGGGAGGGGGCCAGGGATGGAGGGGAGGGGTTGAGGAGCGAGAGGCAG
>ENSG00000060749
TGCAATAAAACATCATTTATTATGGCGATGTAAAGCAAGCACCAACAGCTTCAAAACATTACCAATTATAGCTC
>ENSG00000079616
ACCGGAGCAAAAACTGTATTTACACAACACGGGGTTATACAAAAATTTGAAAAGGCGGAGTGAGGAGACGACGG
>ENSG00000079616
ACCGGAGCAAAAACTGTATTTACACAACACGGGGTTATACAAAAATTTGAAAAGGCGGAGTGAGGAGACGACGG
>ENSG00000079616
ACCGGAGCAAAAACTGTATTTACACAACACGGGGTTATACAAAAATTTGAAAAGGCGGAGTGAGGAGACGACGG
>ENSG00000079616
ACCGGAGCAAAAACTGTATTTACACAACACGGGGTTATACAAAAATTTGAAAAGGCGGAGTGAGGAGACGACGG
>ENSG00000103152
CACAGTTTTCTAGAAATAAAACATTTATTCGGTTTTTAAACAATTAAAAAATCTTGTCTGGGCAGGCCCTTTGC
>ENSG00000112038
GCCATACTGATGTGAAAATGCCGAATTTGGAAGGGAGTCAAGGGCAGTGTCGGGCAACTGAAGAATAATCATGC
>ENSG00000116044
TTCACATCACAGTAGGAGCTTTTAGTATAATAGTACAAAAAAACTAGCTCAGAAAAGGTCAAATCCTCCTAAAT
>ENSG00000125995
TACTCAAAGACTTTCTTTTATTAGTACATGGGCTGGGATTGATGGGAAGGGACAGATGTAGTTGGCAACCATGG
>ENSG00000125995
TACTCAAAGACTTTCTTTTATTAGTACATGGGCTGGGATTGATGGGAAGGGACAGATGTAGTTGGCAACCATGG
>ENSG00000136490
AGCTCGACCTCCTTCCCACCTTCCCCCTGCCGGCTCCAGGCCTTCCGCAGAGGGGGTGGAAGGTTACAGAGGCC
>ENSG00000140264
GAATTACAAAGCTACTTTTAATACTTTGGGGTGAGCCCCACAGGAATAAAAAACACTGGGAAGGGGTAACCCCC
>ENSG00000147894
TAATATTTCTTTCTTTTTAAATGCAACTTCTGTTTTGTTTTTATTCGTAAAAGACACAATTTCATATTGCTTGA
>ENSG00000158552
CAATTTATAACAACAGAGCTTGAGTCAGTTCCAAAAGAATGCTTCCCAAAAGCAAGTGGAGGACTTGGCTGCCA
>ENSG00000174485
TTTAGAGTCTAAAAGTGTTATTTTATACACTGACTATACAATATACATTGAATGTTTACACATACAAATACATC
>ENSG00000177427
CGAAGGCCAGCAGCCTCTCCTGCAGTGTCAGACACAGCGGTGCTGGGGAGCTGAGCTGTGGTGTCACCTCAGGA
>ENSG00000185958
AAAGAGAACAAAATAGGCATTTTACTGAAAGATACTGAAATGTACTTTCAACATGCTTGTATTTAATTTTACAG
>ENSG00000197530
CCGAGAATCTTTCTTTTTATAAAACACAGGGCGGGGGCACGCGAAGGCAGCTCGGGCGCGGCGGACGGCGCGGC
>ENSG00000197530
CCGAGAATCTTTCTTTTTATAAAACACAGGGCGGGGGCACGCGAAGGCAGCTCGGGCGCGGCGGACGGCGCGGC
>ENSG00000197530
CCGAGAATCTTTCTTTTTATAAAACACAGGGCGGGGGCACGCGAAGGCAGCTCGGGCGCGGCGGACGGCGCGGC
>ENSG00000079616
CACCGGAGCAAAAACTGTATTTACACAACACGGGGTTATACAAAAATTTGAAAAGGCGGAGTGAGGAGACGACGG
>ENSG00000079616
CACCGGAGCAAAAACTGTATTTACACAACACGGGGTTATACAAAAATTTGAAAAGGCGGAGTGAGGAGACGACGG
>ENSG00000095059
TGGAAGGACTTCAGATACCATCTTATTCTAGAGACGTAGCTGACCAAAAAGTAGGGGAGGGGCTGGGTCTGCAAA
>ENSG00000102904
TGGATTCAGACAAACACTTTTATATTAAAAGCTAGGGGTTAGCAGGACTGGAGTACGCAGGCTGCCCACAAGTTC
>ENSG00000102904
TGGATTCAGACAAACACTTTTATATTAAAAGCTAGGGGTTAGCAGGACTGGAGTACGCAGGCTGCCCACAAGTTC
>ENSG00000112514
GACCCAAAGACGGGATTTATTGGGGGCCCAGTCATCACCTGGAAGTCAGAAGGCGTTGAAGTATCGCGGGGATCT
>ENSG00000117676
CCGGCCTGCTCCCTCTGGGAAGCATGCTGACTGTGTCAAGCTAGCACCGCCCTGTGGCCCGAATGCCCTGGTGCC
>ENSG00000123143
TCCGGCAAATCCCAAAGGCCTTTTTAAAAACTAAGAGCTCTCGGGCAGGGGCAGGGGCAGGGGCAGGGGAGGGGG
>ENSG00000123143
TCCGGCAAATCCCAAAGGCCTTTTTAAAAACTAAGAGCTCTCGGGCAGGGGCAGGGGCAGGGGCAGGGGAGGGGG
>ENSG00000126456
CATAGCAGGAACCAGTTTATTGGTTGAGGTGGTGGGGAACAGGGGGGTTGGAGGCACACCATGAGGAGCGAGGGC
>ENSG00000131037
CCGCTATTGGGGAGAGTCTGAGGAGTCCGTTCTCCCACGGGGCCTCGTCACTCTTTGCGAAGGGCGCCTGGCAGG
>ENSG00000131236
TCTAGAAAAGAACCGTCTTGATACAGATTTATCCCATGGTGTGAAGGGAGGGCAAAGAACCCAGTGGCACTTCGC
>ENSG00000135837
TGAAGAATCCTAATCCATTACTTTATTAACAACATTAAAAACATTTTAGACGTCACATACACATTAGCCTTGATA
[truncated: 36,922 more rows]
